# Supplementary material
Source: PubMed Central journal article supplement (PMC3839851)
Supplement: NIHMS55696-supplement-1.pdf [file NIHMS55696-supplement-1.pdf]

# Supplementary Figure 1

## Genome-wide copy number changes in 6 chondroblastomas.

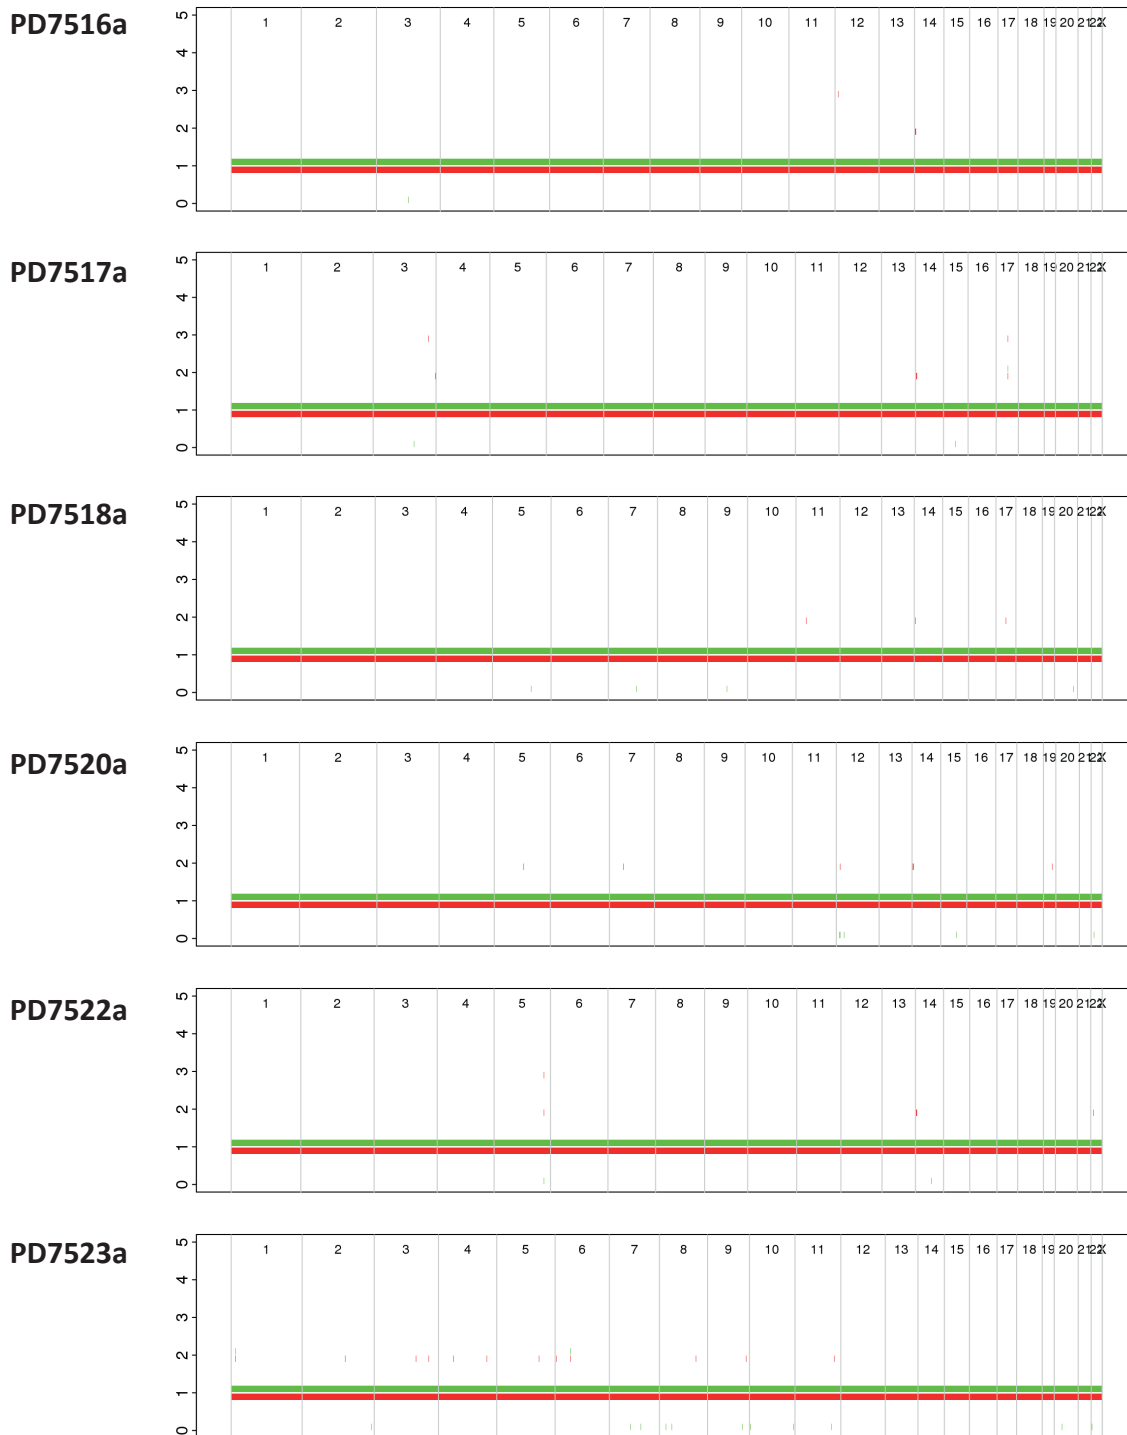

The copy number is shown on the y axis. X-axis represent relative genomic positions, in ascending order. Characters in plot area are chromosomes. Red and green lines represent the major and minor allele, respectively.

**Supplementary Table 1:**

Clinical features of cases included in the whole genome screen and in the extension series, with histone 3.3 mutation status

| Case ID  | Histone variant | Main histology            | Anatomical site               | Age at diagnosis | Sex |
|----------|-----------------|---------------------------|-------------------------------|------------------|-----|
| PD10000a | H3F3A G34W      | Giant cell tumour of bone | Femur, left                   | 35               | M   |
| PD10002a | H3F3A G34W      | Giant cell tumour of bone | Tibia, right                  | 14               | F   |
| PD10003a | WT              | Giant cell tumour of bone | Tibia, left                   | 30               | M   |
| PD10004a | H3F3A G34W      | Giant cell tumour of bone | Femur, right                  | 34               | F   |
| PD10005a | WT              | Giant cell tumour of bone | Patella, left                 | 18               | F   |
| PD10076a | WT              | Chondromyxoid fibroma     | Toe                           | 18               | M   |
| PD10077a | WT              | Chondromyxoid fibroma     | Tibia, left                   | 10               | F   |
| PD10078a | WT              | Chondromyxoid fibroma     | Toe, left                     | 21               | M   |
| PD10079a | WT              | Chondromyxoid fibroma     | Tibia                         | 34               | M   |
| PD10080a | WT              | Chondromyxoid fibroma     | Tibia                         | 23               | F   |
| PD10081a | WT              | Chondromyxoid fibroma     | Femur, left                   | 15               | F   |
| PD10083a | WT              | Chondromyxoid fibroma     | Metatarsal                    | 20               | F   |
| PD10084a | WT              | Chondromyxoid fibroma     | Calcaneus, right              | 12               | M   |
| PD12370a | WT              | Osteosarcoma              | Femur right distal            | 12               | M   |
| PD12423a | WT              | Chondromyxoid fibroma     | Metatarsal, left              | 24               | F   |
| PD12431a | WT              | Osteosarcoma              | Femur left distal             | 46               | F   |
| PD12435a | WT              | Osteosarcoma              | Right humerus                 | 70               | F   |
| PD12445a | WT              | Osteosarcoma              | Femur left distal             | 76               | F   |
| PD12446a | WT              | Osteosarcoma              | Fibula left distal            | 26               | F   |
| PD12447a | WT              | Osteosarcoma              | Femur left                    | 49               | M   |
| PD12448a | WT              | Osteosarcoma              | Tibia left distal             | 38               | F   |
| PD12449a | WT              | Osteosarcoma              | Humerus right proximal        | 6                | M   |
| PD12453a | WT              | Osteosarcoma              | Femur right distal            | 12               | M   |
| PD12454a | WT              | Osteosarcoma              | Fibula right proximal         | 23               | M   |
| PD12455a | WT              | Osteosarcoma              | Tibia left proximal           | 17               | F   |
| PD12456a | WT              | Osteosarcoma              | Tibia right                   | 20               | F   |
| PD12458a | WT              | Osteosarcoma              | Humerus                       | 15               | F   |
| PD12461a | WT              | Osteosarcoma              | Femur left                    | 19               | F   |
| PD3786a  | WT              | Osteosarcoma              | Humerus right diaphysis       | 9                | M   |
| PD3789a  | WT              | Osteosarcoma              | Femur                         | 62               | M   |
| PD3790a  | WT              | Chondrosarcoma            | Humerus                       | 75               | M   |
| PD3791a  | WT              | Osteosarcoma              | Fibula                        | 78               | M   |
| PD3792a  | WT              | Osteosarcoma              | Femur                         | 56               | M   |
| PD3793a  | WT              | Osteosarcoma              | Femur                         | 61               | M   |
| PD3794a  | WT              | Osteosarcoma              | Femur right distal            | 46               | F   |
| PD3796a  | WT              | Osteosarcoma              | Femur                         | 14               | M   |
| PD3797a  | WT              | Osteosarcoma              | Radius                        | 14               | F   |
| PD3799a  | WT              | Osteosarcoma              | Femur                         | 33               | F   |
| PD3804a  | WT              | Chordoma                  | Mets. Anterior abdominal wall | 58               | F   |
| PD3806a  | WT              | Chordoma                  | Sacrum                        | 43               | F   |
| PD3807a  | WT              | Chordoma                  | Sacrum                        | 61               | M   |
| PD3808a  | WT              | Chordoma                  | Sacrum                        | 61               | M   |
| PD3812a  | WT              | Chordoma                  | Sacrum                        | 67               | F   |
| PD3814a  | WT              | Chordoma                  | Sacrum                        | 75               | F   |
| PD3815a  | WT              | Chordoma                  | Sacrum                        | 69               | M   |
| PD3819a  | WT              | Chordoma                  | Sacrum                        | 58               | F   |
| PD3820a  | WT              | Chordoma                  | Sacrum                        | 58               | M   |
| PD3821a  | WT              | Chordoma                  | Sacrum                        | 63               | M   |

|         |               |                               |                        |    |   |
|---------|---------------|-------------------------------|------------------------|----|---|
| PD3862a | WT            | Osteosarcoma                  | Pelvis ilium           | 19 | F |
| PD4183a | WT            | Chordoma                      | Sacrum                 | 62 | M |
| PD4187a | WT            | Chordoma                      | Sacrum                 | 57 | M |
| PD4188a | WT            | Chordoma                      | Sacrum                 | 67 | F |
| PD4884a | WT            | Osteosarcoma                  | Tibia left             | 14 | F |
| PD4885a | WT            | Osteosarcoma                  | Pelvis ilium left      | 69 | F |
| PD4886a | WT            | Osteosarcoma                  | Tibia left distal      | 24 | M |
| PD4887a | WT            | Osteosarcoma                  | Femur right proximal   | 60 | F |
| PD4889a | WT            | Osteosarcoma                  | Femur right distal     | 11 | M |
| PD4890a | WT            | Osteosarcoma                  | Tibia right distal     | 56 | F |
| PD4891a | WT            | Osteosarcoma                  | Femur left distal      | 19 | F |
| PD4892a | WT            | Osteosarcoma                  | Tibia left proximal    | 18 | M |
| PD4893a | WT            | Osteosarcoma                  | Femur right proximal   | 62 | M |
| PD4894a | WT            | Osteosarcoma                  | Femur right distal     | 36 | M |
| PD4895a | WT            | Osteosarcoma                  | Femur left distal      | 24 | F |
| PD4896a | WT            | Osteosarcoma                  | Tibia                  | 60 | F |
| PD4897a | WT            | Osteosarcoma                  | Tibia                  | 13 | M |
| PD4898a | WT            | Osteosarcoma                  | Femur                  | 12 | F |
| PD4900a | WT            | Osteosarcoma                  | Pelvis ilium right     | 24 | F |
| PD4901a | WT            | Osteosarcoma                  | Femur                  | 13 | F |
| PD4902a | WT            | Osteosarcoma                  | Tibia right proximal   | 22 | M |
| PD4903a | WT            | Osteosarcoma                  | Femur right proximal   | 44 | M |
| PD4904a | WT            | Osteosarcoma                  | Femur left distal      | 15 | M |
| PD4905a | HIST1H3H G12R | Osteosarcoma                  | Femur right proximal   | 16 | M |
| PD4906a | WT            | Osteosarcoma                  | Humerus right          | 66 | M |
| PD4907a | WT            | Osteosarcoma                  | Femur left distal      | 19 | M |
| PD4908a | WT            | Osteosarcoma                  | Pelvic soft tissue     | 53 | M |
| PD4909a | WT            | Osteosarcoma                  | Femur right distal     | 16 | M |
| PD4910a | WT            | Osteosarcoma                  | Femur right distal     | 8  | F |
| PD4911a | WT            | Osteosarcoma                  | Femur right proximal   | 39 | M |
| PD4912a | WT            | Chondrosarcoma                | Femur                  | 72 | M |
| PD4913a | WT            | Osteosarcoma                  | Axilla                 | 80 | F |
| PD4914a | WT            | Osteosarcoma                  | Tibia & foot           | 47 | F |
| PD4915a | H3F3A G34R    | Osteosarcoma (not giant cell) | Femur                  | 47 | M |
| PD4916a | WT            | Osteosarcoma                  | Tibia                  | 45 | M |
| PD4917a | WT            | Osteosarcoma                  | Ilium                  | 69 | F |
| PD4918a | WT            | Osteosarcoma                  | Pelvis ilium           | 10 | M |
| PD4919a | WT            | Osteosarcoma                  | Tibia left proximal    | 49 | F |
| PD4920a | WT            | Osteosarcoma                  | Pelvis ilium           | 46 | F |
| PD4921a | WT            | Osteosarcoma                  | Femur left distal      | 64 | M |
| PD4922a | H3F3B G34R    | Osteosarcoma (not giant cell) | Femur left proximal    | 37 | F |
| PD4923a | WT            | Osteosarcoma                  | Femur right distal     | 37 | M |
| PD4924a | WT            | Osteosarcoma                  | Tibia left proximal    | 12 | M |
| PD4925a | WT            | Osteosarcoma                  | Pelvis ilium           | 31 | M |
| PD4926a | WT            | Chordoma                      | Sacrum                 | 54 | M |
| PD4927a | WT            | Chordoma                      | Sacrum                 | 65 | F |
| PD4928a | WT            | Chordoma                      | L3                     | 68 | M |
| PD4929a | WT            | Chordoma                      | Clivus                 | 6  | M |
| PD5915a | WT            | Osteosarcoma                  | Femur                  | 54 | F |
| PD5916a | WT            | Osteosarcoma                  | Pelvis ilium           | 75 | M |
| PD5918a | WT            | Osteosarcoma                  | Humerus left           | 20 | M |
| PD5919a | WT            | Osteosarcoma                  | Femur right            | 62 | F |
| PD5920a | WT            | Osteosarcoma                  | Femur left             | 13 | F |
| PD5921a | WT            | Osteosarcoma                  | Humerus right proximal | 15 | M |
| PD5922a | WT            | Osteosarcoma                  | Femur right distal     | 12 | F |
| PD5924a | WT            | Osteosarcoma                  | Femur left distal      | 81 | M |
| PD6341a | WT            | Chondrosarcoma                | Femur                  | 10 | F |
| PD6342a | WT            | Chondrosarcoma                | Pelvis                 | 73 | M |

|         |    |                |                     |    |   |
|---------|----|----------------|---------------------|----|---|
| PD6343a | WT | Chondrosarcoma | Foot                | 72 | M |
| PD6344a | WT | Chondrosarcoma | Tibia               | 31 | M |
| PD6345a | WT | Chondrosarcoma | Knee                | 81 | M |
| PD6346a | WT | Chondrosarcoma | Femur               | 70 | M |
| PD6349a | WT | Chondrosarcoma | Humerus             | 50 | M |
| PD6350a | WT | Chondrosarcoma | Femur               | 78 | M |
| PD6351a | WT | Chondrosarcoma | Pelvis              | 50 | M |
| PD6353a | WT | Chondrosarcoma | Humerus             | 36 | F |
| PD6354a | WT | Chondrosarcoma | Hand                | 81 | M |
| PD6355a | WT | Chondrosarcoma | Humerus             | 49 | M |
| PD6358a | WT | Chondrosarcoma | Femur               | 68 | M |
| PD6359a | WT | Chondrosarcoma | Pelvis              | 72 | M |
| PD6360a | WT | Chondrosarcoma | Femur               | 81 | M |
| PD6361a | WT | Chondrosarcoma | calcaneus           | 65 | M |
| PD6362a | WT | Chondrosarcoma | Tibia               | 30 | F |
| PD6363a | WT | Chondrosarcoma | Humerus             | 71 | M |
| PD6365a | WT | Chondrosarcoma | Pelvis              | 73 | M |
| PD6366a | WT | Chondrosarcoma | Hand                | 62 | F |
| PD6367a | WT | Chondrosarcoma | Femur               | 60 | M |
| PD6370a | WT | Chordoma       | Clivus              | 21 | F |
| PD6744a | WT | Chondrosarcoma | Rib                 | 69 | F |
| PD6745a | WT | Chondrosarcoma | Sternum             | 44 | M |
| PD6746a | WT | Chondrosarcoma | Pelvis              | 71 | M |
| PD6747a | WT | Chondrosarcoma | Pelvis              | 36 | F |
| PD6748a | WT | Chondrosarcoma | Rib                 | 53 | F |
| PD6749a | WT | Chondrosarcoma | Femur               | 55 | M |
| PD6750a | WT | Chondrosarcoma | Femur               | 66 | M |
| PD6751a | WT | Chondrosarcoma | Scapula             | 31 | M |
| PD6752a | WT | Chondrosarcoma | Rib                 | 42 | M |
| PD6753a | WT | Chondrosarcoma | Pelvis              | 39 | M |
| PD6754a | WT | Chondrosarcoma | Tibia               | 77 | M |
| PD6755a | WT | Chondrosarcoma | Pelvis              | 76 | M |
| PD6756a | WT | Chondrosarcoma | Rib                 | 52 | M |
| PD6757a | WT | Chondrosarcoma | Pelvis              | 53 | F |
| PD6759a | WT | Chondrosarcoma | Pelvis              | 44 | F |
| PD6760a | WT | Chondrosarcoma | Femur               | 51 | M |
| PD6761a | WT | Chondrosarcoma | Femur               | 68 | M |
| PD6762a | WT | Chondrosarcoma | Pelvis              | 65 | F |
| PD6763a | WT | Chondrosarcoma | Tibia               | 81 | F |
| PD6765a | WT | Chondrosarcoma | Sternum             | 66 | M |
| PD6767a | WT | Chondrosarcoma | Foot                | 26 | M |
| PD7054a | WT | Chondrosarcoma | Scapula             | 66 | M |
| PD7055a | WT | Osteosarcoma   | Femur left proximal | 47 | F |
| PD7061a | WT | Chondrosarcoma | Femur               | 44 | M |
| PD7062a | WT | Chordoma       | Sacrum              | 49 | F |
| PD7063a | WT | Chordoma       | Sacrum              | 65 | F |
| PD7183a | WT | Chordoma       | Coccyx              | 52 | M |
| PD7184a | WT | Chordoma       | Sacrum              | 64 | M |
| PD7185a | WT | Chordoma       | Sacrum              | 75 | F |
| PD7186a | WT | Chordoma       | ST Pelvis           | 56 | M |
| PD7187a | WT | Chordoma       | Sacrum              | 67 | M |
| PD7193a | WT | Osteosarcoma   | Femur distal        | 10 | M |
| PD7194a | WT | Osteosarcoma   | Femur distal        | 21 | F |
| PD7195a | WT | Osteosarcoma   | Maxilofacial        | 28 | M |
| PD7196a | WT | Osteosarcoma   | Femur Distal        | 19 | M |
| PD7197a | WT | Osteosarcoma   | Femur               | 11 | F |
| PD7299a | WT | Chondrosarcoma | Femur               | 43 | M |
| PD7300a | WT | Chondrosarcoma | Humerus             | 53 | M |

|         |            |                            |                        |    |   |
|---------|------------|----------------------------|------------------------|----|---|
| PD7301a | WT         | Chondrosarcoma             | Pelvis                 | 27 | M |
| PD7302a | WT         | Chondrosarcoma             | Femur                  | 41 | M |
| PD7303a | WT         | Chondrosarcoma             | Foot                   | 22 | F |
| PD7401a | WT         | Osteosarcoma               | Femur right distal     | 36 | F |
| PD7507a | WT         | Osteosarcoma               | Femur distal           | 46 | F |
| PD7508a | WT         | Osteosarcoma               | Femur Distal           | 34 | F |
| PD7509a | WT         | Osteosarcoma               | Fibula proximal        | 22 | M |
| PD7510a | WT         | Osteosarcoma               | Retroperitoneal        | 23 | F |
| PD7511a | WT         | Osteosarcoma               | Femur distal           | 83 | M |
| PD7512a | WT         | Osteosarcoma               | Tibia proximal         | 20 | M |
| PD7513a | WT         | Osteosarcoma               | Femur distal           | 11 | F |
| PD7516a | H3F3B K36M | Chondroblastoma            | Femur, left            | 16 | M |
| PD7517a | H3F3B K36M | Chondroblastoma            | Humerus, left          | 13 | M |
| PD7518a | H3F3A K36M | Chondroblastoma            | humerus, left          | 20 | M |
| PD7520a | H3F3B K36M | Chondroblastoma            | Humerus, right         | 11 | M |
| PD7522a | H3F3B K36M | Chondroblastoma            | Femur, left            | 16 | M |
| PD7523a | H3F3B K36M | Chondroblastoma            | Tibia, left            | 14 | M |
| PD7526a | WT         | Chondromyxoid fibroma      | Tibia, left            | 21 | F |
| PD9034a | WT         | Chondrosarcoma             | First finger           | 55 | M |
| PD9035a | WT         | Chondrosarcoma             | Foot                   | 27 | F |
| PD9036a | WT         | Chondrosarcoma             | Femur                  | 59 | F |
| PD9037a | WT         | Chondrosarcoma             | Ilium                  | 35 | F |
| PD9038a | WT         | Chondrosarcoma             | Tibia                  | 25 | F |
| PD9039a | WT         | Chondrosarcoma             | fibula                 | 51 | F |
| PD9040a | H3F3A K36M | Chondrosarcoma (not giant) | Femur                  | 72 | F |
| PD9041a | WT         | Chondrosarcoma             | Humerus                | 59 | M |
| PD9042a | WT         | Chondrosarcoma             | Scapula                | 55 | M |
| PD9044a | WT         | Chondrosarcoma             | Femur                  | 53 | M |
| PD9045a | WT         | Chondrosarcoma             | Rib                    | 53 | M |
| PD9048a | WT         | Chondrosarcoma             | Rib                    | 73 | M |
| PD9049a | WT         | Clear cell chondrosarcoma  | Vertebra               | 50 | M |
| PD9050a | WT         | Chondrosarcoma             | Pelvis                 | 33 | M |
| PD9051a | WT         | Chondrosarcoma             | Femur                  | 59 | M |
| PD9052a | WT         | Osteosarcoma               | Fibula right proximal  | 21 | M |
| PD9053a | WT         | Osteosarcoma               | Humerus right proximal | 18 | M |
| PD9054a | WT         | Osteosarcoma               | Femur                  | 12 | M |
| PD9055a | WT         | Osteosarcoma               | Femur right            | 22 | M |
| PD9072a | WT         | Soft tissue chondroma      | Foot                   | 61 | F |
| PD9083a | WT         | Soft tissue chondroma      | Hand                   | 23 | M |
| PD9092a | WT         | Soft tissue chondroma      | Heel                   | 19 | M |
| PD9094a | WT         | Soft tissue chondroma      | Foot                   | 46 | F |
| PD9099a | WT         | Synovial chondroma         | Knee                   | 48 | M |
| PD9104a | WT         | Clear cell chondrosarcoma  | Humerus                | 50 | M |
| PD9105a | WT         | Soft tissue chondroma      | Foot                   | 45 | F |
| PD9109a | WT         | Synovial chondroma         | Knee                   | 42 | M |
| PD9115a | WT         | Chondrosarcoma             | Scapula                | 44 | M |
| PD9388a | WT         | Chondrosarcoma             | Hand                   | 54 | M |
| PD9390a | WT         | Chondrosarcoma             | Sacrum                 | 58 | F |
| PD9391a | WT         | Chondrosarcoma             | Pelvis                 | 52 | M |
| PD9392a | H3F3B K36M | Chondroblastoma            | Humerus, left          | 17 | M |
| PD9393a | WT         | Chondrosarcoma             | Foot                   | 30 | F |
| PD9394a | WT         | Chondrosarcoma             | Femur                  | 51 | F |
| PD9396a | H3F3B K36M | Chondroblastoma            | Femur, left            | 35 | M |
| PD9397a | H3F3B K36M | Chondroblastoma            | Femur, left            | 9  | M |
| PD9400a | WT         | Chondrosarcoma             | Femur                  | 65 | M |
| PD9610a | WT         | Chondrosarcoma             | Fifth toe              | 47 | F |
| PD9611a | WT         | Chondrosarcoma             | Hand                   | 28 | M |
| PD9616a | WT         | Chondrosarcoma             | Pelvis                 | 59 | M |

|           |            |                           |                        |    |   |
|-----------|------------|---------------------------|------------------------|----|---|
| PD9967a   | WT         | Osteosarcoma              | Tibia right proximal   | 41 | F |
| PD9968a   | WT         | Osteosarcoma              | Femur                  | 17 | F |
| PD9970a   | WT         | Osteosarcoma              | Humerus                | 14 | M |
| PD9971a   | WT         | Osteosarcoma              | Femur                  | 19 | M |
| PD9973a   | WT         | Osteosarcoma              | Femur right distal     | 17 | M |
| PD9974a   | WT         | Osteosarcoma              | Tibia                  | 44 | F |
| PD9978a   | WT         | Osteosarcoma              | Femur right distal     | 17 | M |
| PD9980a   | WT         | Osteosarcoma              | Femur                  | 5  | F |
| PD9981a   | WT         | Osteosarcoma              | Tibia left proximal    | 12 | F |
| PD9983a   | WT         | Osteosarcoma              | Fibula right proximal  | 14 | F |
| PD9984a   | WT         | Osteosarcoma              | Femur                  | 13 | M |
| PD9985a   | WT         | Osteosarcoma              | Tibia right proximal   | 12 | M |
| PD9986a   | WT         | Osteosarcoma              | Femur                  | 72 | M |
| PD9989a   | WT         | Osteosarcoma              | Femur right distal     | 12 | F |
| PD9990a   | H3F3A G34W | Giant cell tumour of bone | Humerus, right         | 43 | M |
| PD9991a   | H3F3A G34W | Giant cell tumour of bone | Tibia, right           | 33 | F |
| PD9992a   | H3F3A G34W | Giant cell tumour of bone | Tibia                  | 30 | F |
| PD9993a   | H3F3A G34W | Giant cell tumour of bone | Fibula, left           | 21 | F |
| PD9995a   | H3F3A G34W | Giant cell tumour of bone | Femur, right           | 31 | F |
| PD9996a   | H3F3A G34L | Giant cell tumour of bone | Femur, right           | 29 | F |
| PD9997a   | WT         | Giant cell tumour of bone | SB, Finger, left index | 40 | M |
| PD9998a   | H3F3A G34W | Giant cell tumour of bone | SB, thumb, left        | 50 | M |
| PD9999a   | H3F3A G34W | Giant cell tumour of bone | Rib                    | 10 | F |
| S00010551 | WT         | Chondromyxoid fibroma     | Finger, right middle   | 36 | M |
| S00010552 | WT         | Chondromyxoid fibroma     | Femur, left            | 13 | F |
| S00010553 | WT         | Chondromyxoid fibroma     | Tibia                  | 20 | M |
| S00010554 | WT         | Chondromyxoid fibroma     | Tibia, left            | 8  | F |
| S00010555 | WT         | Chondromyxoid fibroma     | Femur, left            | 12 | F |
| S00010556 | WT         | Chondromyxoid fibroma     | Pubic ramus, right     | 44 | F |
| S00010557 | WT         | Chondromyxoid fibroma     | Ilium, left            | 30 | F |
| S00010558 | WT         | Chondromyxoid fibroma     | Metatarsal, right foot | 34 | F |
| S00010560 | WT         | Chondromyxoid fibroma     | Toe, right             | 13 | F |
| S00010561 | WT         | Chondromyxoid fibroma     | Ilium, left            | 57 | F |
| S00010562 | WT         | Chondromyxoid fibroma     | Metatarsal, right foot | 29 | M |
| S00010563 | WT         | Chondromyxoid fibroma     | Femur, right           | 26 | M |
| S00010564 | WT         | Chondromyxoid fibroma     | Calcaneus, right       | 27 | M |
| S00010566 | WT         | Chondromyxoid fibroma     | Tibia                  | 57 | M |
| S00010567 | WT         | Chondromyxoid fibroma     | Tibia, left            | 15 | F |
| S00010569 | WT         | Chondromyxoid fibroma     | Metatarsal, left       | 50 | M |
| S00010570 | WT         | Chondromyxoid fibroma     | Tibia, left            | 13 | F |
| S00010571 | WT         | Chondromyxoid fibroma     | Ilium, left            | 54 | F |
| S00010602 | H3F3B K36M | Chondroblastoma           | Acromion, left         | 28 | M |
| S00010611 | H3F3B K36M | Chondroblastoma           | Tibia, left            | 16 | M |
| S00010620 | H3F3B K36M | Chondroblastoma           | Femur, left            | 11 | F |
| S00010626 | H3F3A K36M | Chondroblastoma           | Femur, right           | 28 | M |
| S00010629 | H3F3B K36M | Chondroblastoma           | Humerus, right         | 14 | F |
| S00010632 | H3F3A K36M | Chondroblastoma           | Talus, left            | 29 | F |
| S00010635 | H3F3B K36M | Chondroblastoma           | Humerus, right         | 23 | M |
| S00010638 | H3F3B K36M | Chondroblastoma           | Humerus, left          | 49 | M |
| S00010641 | H3F3B K36M | Chondroblastoma           | Glenoid lesion         | 28 | F |
| S00010644 | H3F3B K36M | Chondroblastoma           | Tibia, left            | 18 | M |
| S00010647 | H3F3B K36M | Chondroblastoma           | Femur                  | 12 | F |
| S00010650 | H3F3B K36M | Chondroblastoma           | Tibia, right           | 16 | M |
| S00010653 | H3F3B K36M | Chondroblastoma           | Tibia, right           | 16 | M |
| S00010656 | H3F3B K36M | Chondroblastoma           | Calcaneus, left        | 25 | M |
| S00010659 | H3F3B K36M | Chondroblastoma           | Hip, left              | 15 | M |
| S00010662 | H3F3B K36M | Chondroblastoma           | Femur, right           | 16 | M |
| S00010700 | H3F3B K36M | Chondroblastoma           | Humerus, right         | 16 | F |

|           |            |                           |                                 |    |   |
|-----------|------------|---------------------------|---------------------------------|----|---|
| S00010705 | H3F3B K36M | Chondroblastoma           | Femur, left                     | 15 | M |
| S00010708 | H3F3B K36M | Chondroblastoma           | Humerus, right                  | 15 | F |
| S00010711 | H3F3B K36M | Chondroblastoma           | Femur, left                     | 15 | M |
| S00010714 | H3F3B K36M | Chondroblastoma           | Humerus, right                  | 14 | M |
| S00010717 | H3F3B K36M | Chondroblastoma           | Tibia, right                    | 16 | M |
| S00010723 | H3F3B K36M | Chondroblastoma           | Humerus, right                  | 13 | F |
| S00018760 | H3F3A G34W | Giant cell tumour of bone | Fibula, right                   | 30 | F |
| S00018761 | H3F3A G34W | Giant cell tumour of bone | Tibia, right                    | 21 | F |
| S00018762 | H3F3A G34W | Giant cell tumour of bone | Femur, left                     | 49 | M |
| S00018764 | H3F3A G34W | Giant cell tumour of bone | Tibia                           | 25 | M |
| S00025249 | WT         | Chondromyxoid fibroma     | Tibia, left                     | 26 | M |
| S00025265 | WT         | Chondromyxoid fibroma     | Tibia                           | 15 | F |
| S00036866 | H3F3A G34W | Giant cell tumour of bone | Radius                          | 70 | F |
| S00032539 | WT         | Chondromyxoid fibroma     | Tibia                           | 12 | F |
| S00032541 | WT         | Chondromyxoid fibroma     | Olecranon, left                 | 42 | F |
| S00032543 | H3F3B K36M | Chondroblastoma           | Humerus, right                  | 15 | M |
| S00032547 | H3F3A G34W | Giant cell tumour of bone | Pelvis, left                    | 48 | M |
| S00032549 | H3F3B K36M | Chondroblastoma           | Tibia, right                    | 17 | M |
| S00032551 | H3F3B K36M | Chondroblastoma           | Tibia, right                    | 15 | F |
| S00032553 | H3F3B K36M | Chondroblastoma           | Humerus, right                  | 14 | F |
| S00032555 | H3F3B K36M | Chondroblastoma           | Humerus                         | 14 | F |
| S00032571 | H3F3B K36M | Chondroblastoma           | Ankle                           | 35 | F |
| S00032573 | H3F3B K36M | Chondroblastoma           | Femur                           | 17 | M |
| S00032575 | H3F3B K36M | Chondroblastoma           | Fibula                          | 15 | M |
| S00032577 | H3F3B K36M | Chondroblastoma           | Femur                           | 15 | M |
| S00032579 | H3F3B K36M | Chondroblastoma           | Femur                           | 15 | M |
| S00032581 | H3F3B K36M | Chondroblastoma           | Scapula                         | 26 | M |
| S00032734 | WT         | Chondromyxoid fibroma     | Pubic ramus, right              | 44 | F |
| S00032738 | H3F3B K36M | Chondroblastoma           | Tibia, right                    | 15 | F |
| S00032740 | H3F3B K36M | Chondroblastoma           | Femur, left                     | 18 | M |
| S00032742 | WT         | Chondroblastoma           | Sacrum                          | 13 | M |
| S00032746 | H3F3B K36M | Chondroblastoma           | Patella, right                  | 19 | M |
| S00032748 | H3F3B K36M | Chondroblastoma           | Femur, right                    | 27 | M |
| S00032750 | WT         | Chondroblastoma           | Calcaneus, right                | 23 | M |
| S00032752 | H3F3B K36M | Chondroblastoma           | Femur                           | 23 | M |
| S00032754 | H3F3B K36M | Chondroblastoma           | Talus                           | 26 | M |
| S00032756 | H3F3B K36M | Chondroblastoma           | Humerus, left                   | 20 | F |
| S00032758 | H3F3A K36M | Chondroblastoma           | Femur, left                     | 17 | M |
| S00032760 | H3F3B K36M | Chondroblastoma           | Calcaneus, right                | 19 | M |
| S00032809 | H3F3B K36M | Chondroblastoma           | Humerus, right                  | 19 | M |
| S00032818 | H3F3B K36M | Chondroblastoma           | Femur                           | 16 | M |
| S00032826 | WT         | Chondromyxoid fibroma     | Knee, right                     | 20 | M |
| S00032832 | H3F3B K36M | Chondroblastoma           | Femur, right                    | 14 | F |
| S00032949 | H3F3B K36M | Chondroblastoma           | Humerus                         | 13 | M |
| S00032959 | H3F3B K36M | Chondroblastoma           | Femur                           | 16 | F |
| S00032961 | H3F3B K36M | Chondroblastoma           | Femur                           | 16 | M |
| S00032967 | H3F3B K36M | Chondroblastoma           | Tibia, right                    | 12 | F |
| S00032971 | H3F3B K36M | Chondroblastoma           | Humerus, left                   | 15 | F |
| S00032977 | WT         | Chondromyxoid fibroma     | Proximal phalangeal bone of the | 11 | M |
| S00032979 | H3F3B K36M | Chondroblastoma           | Femur                           | 17 | M |
| S00032981 | H3F3B K36M | Chondroblastoma           | Femur                           | 21 | M |
| S00032983 | WT         | Chondromyxoid fibroma     | Foot                            | 13 | M |
| S00032985 | H3F3A K36M | Chondroblastoma           | Tibia                           | 16 | M |
| S00032990 | WT         | Chondroblastoma           | Femur                           | 15 | M |
| S00032993 | H3F3B K36M | Chondroblastoma           | Vertebra                        | 34 | M |
| S00032995 | H3F3B K36M | Chondroblastoma           | Calcaneus                       | 15 | M |
| S00032997 | H3F3B K36M | Chondroblastoma           | Tibia                           | 14 | M |
| S00032999 | WT         | Clear cell chondrosarcoma | Femur                           | 16 | M |

|           |            |                           |                |    |   |
|-----------|------------|---------------------------|----------------|----|---|
| S00033001 | H3F3B K36M | Chondroblastoma           | Humerus        | 14 | M |
| S00033003 | H3F3B K36M | Chondroblastoma           | Humerus        | 16 | F |
| S00033005 | WT         | Chondromyxoid fibroma     | Hand           | 22 | M |
| S00033007 | WT         | Chondromyxoid fibroma     | Hand           | 11 | F |
| S00033009 | WT         | Chondromyxoid fibroma     | Femur          | 20 | M |
| S00033011 | WT         | Clear cell chondrosarcoma | Femur          | 51 | F |
| S00033014 | WT         | Clear cell chondrosarcoma | Femur          | 50 | F |
| S00033016 | WT         | Clear cell chondrosarcoma | Femur          | 19 | M |
| S00033017 | WT         | Clear cell chondrosarcoma | Hip            | 35 | M |
| S00033018 | WT         | Clear cell chondrosarcoma | Femur          | 38 | M |
| S00033019 | WT         | Clear cell chondrosarcoma | Femur          | 32 | M |
| S00033020 | WT         | Clear cell chondrosarcoma | Femur          | 31 | M |
| S00033021 | H3F3B K36M | Chondroblastoma           | Talus          | 19 | F |
| S00033023 | H3F3B K36M | Chondroblastoma           | Femur          | 21 | M |
| S00033029 | H3F3B K36M | Chondroblastoma           | Femur          | 20 | M |
| S00033031 | WT         | Chondroblastoma           | Tibia          | 29 | M |
| S00033033 | WT         | Chondromyxoid fibroma     | Foot           | 21 | F |
| S00033035 | WT         | Chondromyxoid fibroma     | Ulna           | 57 | F |
| S00033045 | WT         | Clear cell chondrosarcoma | Femur          | 53 | M |
| S00033047 | WT         | Clear cell chondrosarcoma | Tibia          | 21 | M |
| S00033050 | WT         | Chondromyxoid fibroma     | Humerus        | 26 | M |
| S00033053 | H3F3B K36M | Clear cell chondrosarcoma | Rib            | 38 | F |
| S00033059 | H3F3A G34W | Giant cell tumour of bone | Femur          | 24 | F |
| S00033062 | H3F3A G34W | Giant cell tumour of bone | Radius, left   | 30 | M |
| S00033065 | H3F3A G34W | Giant cell tumour of bone | Radius, right  | 29 | F |
| S00033071 | H3F3A G34W | Giant cell tumour of bone | Radius, right  | 40 | F |
| S00033074 | H3F3A G34W | Giant cell tumour of bone | Femur, right   | 39 | F |
| S00033077 | H3F3A G34W | Giant cell tumour of bone | Femur, left    | 29 | M |
| S00033079 | WT         | Clear cell chondrosarcoma | Femur          | 45 | M |
| S00033087 | H3F3A G34W | Giant cell tumour of bone | Femur, left    | 42 | F |
| S00033090 | H3F3A G34W | Giant cell tumour of bone | Femur, left    | 28 | F |
| S00033100 | H3F3A G34W | Giant cell tumour of bone | Humerus, right | 29 | F |
| S00033105 | H3F3A G34W | Giant cell tumour of bone | Femur, right   | 24 | M |
| S00033114 | H3F3A G34W | Giant cell tumour of bone | Femur, left    | 52 | M |
| S00033116 | WT         | Clear cell chondrosarcoma | Rib            | 64 | M |
| S00033126 | H3F3A G34W | Giant cell tumour of bone | Femur, right   | 50 | M |
| S00033131 | H3F3A G34W | Giant cell tumour of bone | Radius, left   | 46 | M |
| S00033136 | H3F3A G34W | Giant cell tumour of bone | Radius, right  | 14 | F |
| S00033141 | H3F3A G34W | Giant cell tumour of bone | Femur, right   | 65 | M |
| S00033146 | H3F3A G34W | Giant cell tumour of bone | Radius, left   | 30 | M |
| S00033151 | H3F3A G34W | Giant cell tumour of bone | Ischium, left  | 60 | M |
| S00033154 | H3F3A G34W | Giant cell tumour of bone | Humerus        | 37 | F |
| S00033157 | H3F3A G34W | Giant cell tumour of bone | Radius, left   | 24 | M |
| S00033160 | H3F3A G34W | Giant cell tumour of bone | Ulna, left     | 30 | F |
| S00033163 | H3F3A G34W | Giant cell tumour of bone | Pelvis, right  | 52 | M |
| S00033172 | H3F3A G34W | Giant cell tumour of bone | Femur, left    | 33 | M |
| S00033175 | H3F3A G34W | Giant cell tumour of bone | Femur, left    | 38 | M |
| S00033178 | H3F3A G34W | Giant cell tumour of bone | Humerus, left  | 31 | M |
| S00033181 | H3F3A G34W | Giant cell tumour of bone | Femur          | 30 | F |
| S00033184 | H3F3A G34W | Giant cell tumour of bone | Tibia, left    | 42 | M |
| S00033187 | H3F3A G34W | Giant cell tumour of bone | Femur, right   | 28 | F |
| S00033196 | H3F3A G34W | Giant cell tumour of bone | Humerus, right | 62 | F |
| S00033243 | H3F3A G34W | Giant cell tumour of bone | Femur, left    | 49 | M |
| S00033262 | H3F3A G34W | Giant cell tumour of bone | Fibula, right  | 30 | F |
| S00033285 | H3F3A G34W | Giant cell tumour of bone | Tibia, right   | 21 | F |
| S00033288 | WT         | Giant cell tumour of bone | Tibia          | 25 | M |
| S00033295 | H3F3A G34W | Giant cell tumour of bone | Tibia, left    | 50 | M |
| S00034558 | WT         | Chondromyxoid fibroma     | Tibia          | 15 | F |



|           |            |                 |               |    |   |
|-----------|------------|-----------------|---------------|----|---|
| S00035134 | H3F3B K36M | Chondroblastoma | Patella, Left | 16 | M |
| S00036864 | H3F3B K36M | Chondroblastoma | Femur         | 20 | M |

**Supplementary Table 2.** Substitutions and indels identified in 6 chondroblastoma genomes

NB: The annotation of H3F3A and H3F3B (and all other genes) in this table is per genomic convention and includes the start codon of each protein. In the remainder of this report, the start codon of histone 3.3 mutations was discounted in the annotation in keeping with previous reports of histone 3.3 mutations.

| Sample  | Variant class | Chrom | Start coordinate (bp) | Stop coordinate (bp) | Gene            | Transcript      | cDNA       | Protein   | Mutation consequence | WT base | Mut base |
|---------|---------------|-------|-----------------------|----------------------|-----------------|-----------------|------------|-----------|----------------------|---------|----------|
| PD7516a | Substitution  | 1     | 2820668               | 2820668              | -               | -               | -          | -         | -                    | G       | A        |
| PD7516a | Substitution  | 1     | 7596788               | 7596788              | CAMTA1          | CCDS30576.1     | Intronic   | -         | -                    | C       | T        |
| PD7516a | Substitution  | 1     | 11106656              | 11106656             | MASP2           | CCDS123.1       | c.369C>T   | p.N123N   | Silent               | G       | A        |
| PD7516a | Substitution  | 1     | 14316036              | 14316036             | C1orf196        | ENST00000412667 | Intronic   | -         | -                    | G       | T        |
| PD7516a | Substitution  | 1     | 18145840              | 18145840             | ACTL8           | CCDS183.1       | Intronic   | -         | -                    | G       | A        |
| PD7516a | Substitution  | 1     | 41116766              | 41116766             | RIMS3           | CCDS30687.1     | Intronic   | -         | -                    | C       | T        |
| PD7516a | Substitution  | 1     | 45421354              | 45421354             | EIF2B3          | CCDS517.1       | Intronic   | -         | -                    | C       | T        |
| PD7516a | Substitution  | 1     | 56732850              | 56732850             | -               | -               | -          | -         | -                    | G       | A        |
| PD7516a | Substitution  | 1     | 56781391              | 56781391             | -               | -               | -          | -         | -                    | T       | C        |
| PD7516a | Substitution  | 1     | 56894432              | 56894432             | -               | -               | -          | -         | -                    | C       | G        |
| PD7516a | Substitution  | 1     | 57448318              | 57448318             | -               | -               | -          | -         | -                    | C       | A        |
| PD7516a | Substitution  | 1     | 68527695              | 68527695             | -               | -               | -          | -         | -                    | A       | G        |
| PD7516a | Substitution  | 1     | 73586378              | 73586378             | -               | -               | -          | -         | -                    | C       | A        |
| PD7516a | Substitution  | 1     | 88686472              | 88686472             | -               | -               | -          | -         | -                    | C       | G        |
| PD7516a | Substitution  | 1     | 90987281              | 90987281             | -               | -               | -          | -         | -                    | G       | A        |
| PD7516a | Substitution  | 1     | 96142955              | 96142955             | -               | -               | -          | -         | -                    | G       | T        |
| PD7516a | Substitution  | 1     | 97020952              | 97020952             | -               | -               | -          | -         | -                    | C       | T        |
| PD7516a | Substitution  | 1     | 97919945              | 97919945             | DPYD            | CCDS30777.1     | Intronic   | -         | -                    | A       | G        |
| PD7516a | Substitution  | 1     | 98049014              | 98049014             | DPYD            | CCDS30777.1     | Intronic   | -         | -                    | G       | C        |
| PD7516a | Substitution  | 1     | 104688066             | 104688066            | -               | -               | -          | -         | -                    | G       | A        |
| PD7516a | Substitution  | 1     | 115328895             | 115328895            | -               | -               | -          | -         | -                    | C       | A        |
| PD7516a | Substitution  | 1     | 162159850             | 162159850            | NOS1AP          | CCDS1237.1      | Intronic   | -         | -                    | C       | T        |
| PD7516a | Substitution  | 1     | 169605977             | 169605977            | -               | -               | -          | -         | -                    | A       | T        |
| PD7516a | Substitution  | 1     | 170373721             | 170373721            | -               | -               | -          | -         | -                    | G       | T        |
| PD7516a | Substitution  | 1     | 176182952             | 176182952            | -               | -               | -          | -         | -                    | C       | A        |
| PD7516a | Indel         | 1     | 186057208             | 186057208            | -               | -               | -          | -         | -                    | -       | -        |
| PD7516a | Substitution  | 1     | 186993818             | 186993818            | -               | -               | -          | -         | -                    | C       | T        |
| PD7516a | Substitution  | 1     | 190613669             | 190613669            | -               | -               | -          | -         | -                    | C       | A        |
| PD7516a | Substitution  | 1     | 190812525             | 190812525            | -               | -               | -          | -         | -                    | C       | T        |
| PD7516a | Substitution  | 1     | 194106278             | 194106278            | -               | -               | -          | -         | -                    | T       | C        |
| PD7516a | Substitution  | 1     | 197785053             | 197785053            | -               | -               | -          | -         | -                    | G       | A        |
| PD7516a | Substitution  | 1     | 200634222             | 200634222            | DDX59           | CCDS30964.1     | Intronic   | -         | -                    | C       | A        |
| PD7516a | Indel         | 1     | 209484399             | 209484399            | -               | -               | -          | -         | -                    | -       | -        |
| PD7516a | Substitution  | 1     | 209601599             | 209601599            | -               | -               | -          | -         | -                    | G       | A        |
| PD7516a | Substitution  | 1     | 212141374             | 212141374            | INTS7           | CCDS1501.1      | Intronic   | -         | -                    | A       | G        |
| PD7516a | Substitution  | 1     | 216097554             | 216097554            | USH2A           | CCDS31025.1     | Intronic   | -         | -                    | T       | A        |
| PD7516a | Substitution  | 1     | 222666884             | 222666884            | -               | -               | -          | -         | -                    | C       | T        |
| PD7516a | Substitution  | 1     | 223530777             | 223530777            | SUSD4           | CCDS41471.1     | Intronic   | -         | -                    | A       | T        |
| PD7516a | Substitution  | 1     | 223861370             | 223861370            | -               | -               | -          | -         | -                    | C       | T        |
| PD7516a | Substitution  | 1     | 228019918             | 228019918            | PRSS38          | CCDS1563.1      | Intronic   | -         | -                    | A       | G        |
| PD7516a | Substitution  | 1     | 236085806             | 236085806            | -               | -               | -          | -         | -                    | C       | T        |
| PD7516a | Substitution  | 1     | 240235216             | 240235216            | FMN2            | ENST00000447095 | Intronic   | -         | -                    | T       | A        |
| PD7516a | Substitution  | 1     | 240894531             | 240894531            | -               | -               | -          | -         | -                    | A       | C        |
| PD7516a | Substitution  | 1     | 244068449             | 244068449            | -               | -               | -          | -         | -                    | C       | T        |
| PD7516a | Substitution  | 1     | 244268450             | 244268450            | -               | -               | -          | -         | -                    | C       | T        |
| PD7516a | Substitution  | 1     | 248066973             | 248066973            | -               | -               | -          | -         | -                    | A       | G        |
| PD7516a | Substitution  | 2     | 2035589               | 2035589              | MYT1L           | CCDS46222.1     | Intronic   | -         | -                    | T       | G        |
| PD7516a | Substitution  | 2     | 2264226               | 2264226              | MYT1L           | CCDS46222.1     | Intronic   | -         | -                    | G       | A        |
| PD7516a | Substitution  | 2     | 3265884               | 3265884              | TSSC1           | CCDS1651.1      | Intronic   | -         | -                    | C       | T        |
| PD7516a | Substitution  | 2     | 3809299               | 3809299              | ENSG00000214866 | ENST00000423741 | Intronic   | -         | -                    | C       | G        |
| PD7516a | Substitution  | 2     | 4448753               | 4448753              | -               | -               | -          | -         | -                    | G       | T        |
| PD7516a | Substitution  | 2     | 6696725               | 6696725              | -               | -               | -          | -         | -                    | C       | A        |
| PD7516a | Substitution  | 2     | 17369685              | 17369685             | -               | -               | -          | -         | -                    | A       | G        |
| PD7516a | Substitution  | 2     | 34669543              | 34669543             | -               | -               | -          | -         | -                    | G       | A        |
| PD7516a | Substitution  | 2     | 41001441              | 41001441             | -               | -               | -          | -         | -                    | G       | A        |
| PD7516a | Substitution  | 2     | 56195279              | 56195279             | -               | -               | -          | -         | -                    | G       | C        |
| PD7516a | Substitution  | 2     | 67600494              | 67600494             | -               | -               | -          | -         | -                    | A       | C        |
| PD7516a | Substitution  | 2     | 77686150              | 77686150             | LRRTM4          | CCDS46346.1     | Intronic   | -         | -                    | A       | G        |
| PD7516a | Substitution  | 2     | 87004776              | 87004776             | RMND5A          | CCDS1991.1      | Non-coding | r.5913a>g | 3prime UTR           | A       | G        |
| PD7516a | Substitution  | 2     | 96501467              | 96501467             | -               | -               | -          | -         | -                    | G       | A        |
| PD7516a | Substitution  | 2     | 98598901              | 98598901             | TMEM131         | CCDS46368.1     | Intronic   | -         | -                    | C       | T        |
| PD7516a | Substitution  | 2     | 99535770              | 99535770             | CZorf55         | CCDS42720.1     | Intronic   | -         | -                    | C       | T        |
| PD7516a | Substitution  | 2     | 103877864             | 103877864            | -               | -               | -          | -         | -                    | T       | A        |
| PD7516a | Substitution  | 2     | 104151485             | 104151485            | -               | -               | -          | -         | -                    | T       | G        |
| PD7516a | Substitution  | 2     | 107802821             | 107802821            | -               | -               | -          | -         | -                    | A       | T        |
| PD7516a | Substitution  | 2     | 111586716             | 111586716            | ACOXL           | CCDS42730.1     | Intronic   | -         | -                    | G       | A        |
| PD7516a | Substitution  | 2     | 113377705             | 113377705            | -               | -               | -          | -         | -                    | G       | C        |
| PD7516a | Substitution  | 2     | 116601460             | 116601460            | DPP10           | CCDS46400.1     | Non-coding | r.4410a>g | 3prime UTR           | A       | G        |
| PD7516a | Substitution  | 2     | 117422427             | 117422427            | -               | -               | -          | -         | -                    | T       | A        |
| PD7516a | Substitution  | 2     | 117661784             | 117661784            | -               | -               | -          | -         | -                    | C       | T        |
| PD7516a | Substitution  | 2     | 118476808             | 118476808            | -               | -               | -          | -         | -                    | G       | T        |
| PD7516a | Substitution  | 2     | 119397771             | 119397771            | -               | -               | -          | -         | -                    | G       | C        |
| PD7516a | Substitution  | 2     | 121231853             | 121231853            | -               | -               | -          | -         | -                    | C       | T        |
| PD7516a | Substitution  | 2     | 123500526             | 123500526            | -               | -               | -          | -         | -                    | A       | G        |
| PD7516a | Substitution  | 2     | 124179852             | 124179852            | -               | -               | -          | -         | -                    | A       | T        |
| PD7516a | Substitution  | 2     | 124605558             | 124605558            | -               | -               | -          | -         | -                    | A       | C        |
| PD7516a | Substitution  | 2     | 125141196             | 125141196            | CNTNAP5         | CCDS46401.1     | Intronic   | -         | -                    | C       | T        |
| PD7516a | Substitution  | 2     | 134250560             | 134250560            | NCKAP5          | CCDS46418.1     | Intronic   | -         | -                    | A       | G        |
| PD7516a | Substitution  | 2     | 137358596             | 137358596            | -               | -               | -          | -         | -                    | T       | G        |
| PD7516a | Substitution  | 2     | 139268490             | 139268490            | SPOPL           | CCDS33298.1     | Intronic   | -         | -                    | A       | T        |
| PD7516a | Substitution  | 2     | 139561916             | 139561916            | -               | -               | -          | -         | -                    | C       | T        |
| PD7516a | Substitution  | 2     | 141316725             | 141316725            | LRP1B           | CCDS2182.1      | Intronic   | -         | -                    | G       | A        |
| PD7516a | Substitution  | 2     | 141526557             | 141526557            | LRP1B           | CCDS2182.1      | Intronic   | -         | -                    | G       | A        |
| PD7516a | Substitution  | 2     | 143491094             | 143491094            | -               | -               | -          | -         | -                    | A       | G        |
| PD7516a | Substitution  | 2     | 157353807             | 157353807            | GPD2            | CCDS2202.1      | Intronic   | -         | -                    | G       | A        |
| PD7516a | Substitution  | 2     | 157575688             | 157575688            | -               | -               | -          | -         | -                    | G       | T        |
| PD7516a | Substitution  | 2     | 158367986             | 158367986            | -               | -               | -          | -         | -                    | A       | T        |
| PD7516a | Substitution  | 2     | 164088263             | 164088263            | -               | -               | -          | -         | -                    | C       | T        |
| PD7516a | Substitution  | 2     | 181040906             | 181040906            | -               | -               | -          | -         | -                    | T       | A        |
| PD7516a | Substitution  | 2     | 182568337             | 182568337            | -               | -               | -          | -         | -                    | G       | A        |
| PD7516a | Substitution  | 2     | 183570634             | 183570634            | -               | -               | -          | -         | -                    | A       | G        |
| PD7516a | Substitution  | 2     | 185570008             | 185570008            | ZNF804A         | CCDS2291.1      | Intronic   | -         | -                    | C       | T        |
| PD7516a | Substitution  | 2     | 186324623             | 186324623            | -               | -               | -          | -         | -                    | A       | G        |
| PD7516a | Substitution  | 2     | 188082274             | 188082274            | -               | -               | -          | -         | -                    | C       | T        |
| PD7516a | Substitution  | 2     | 192875545             | 192875545            | TMEFF2          | CCDS2314.1      | Intronic   | -         | -                    | G       | A        |
| PD7516a | Substitution  | 2     | 193987853             | 193987853            | -               | -               | -          | -         | -                    | A       | T        |
| PD7516a | Substitution  | 2     | 200498826             | 200498826            | -               | -               | -          | -         | -                    | T       | A        |
| PD7516a | Substitution  | 2     | 205952700             | 205952700            | PARDB3          | CCDS42806.1     | Intronic   | -         | -                    | T       | G        |
| PD7516a | Substitution  | 2     | 208311154             | 208311154            | -               | -               | -          | -         | -                    | A       | C        |
| PD7516a | Substitution  | 2     | 216584263             | 216584263            | -               | -               | -          | -         | -                    | C       | A        |





|         |              |    |           |           |            |                 |           |         |        |   |   |   |
|---------|--------------|----|-----------|-----------|------------|-----------------|-----------|---------|--------|---|---|---|
| PD7516a | Substitution | 9  | 118246100 | 118246100 | -          | -               | -         | -       | -      | - | T | C |
| PD7516a | Substitution | 9  | 128559534 | 128559534 | PBX3       | CCDS6865.1      | Intronic  | -       | -      | - | A | G |
| PD7516a | Substitution | 9  | 129604876 | 129604876 | -          | -               | -         | -       | -      | - | C | T |
| PD7516a | Substitution | 9  | 131655119 | 131655119 | LRRC8A     | CCDS35155.1     | Intronic  | -       | -      | - | C | T |
| PD7516a | Substitution | 9  | 137750604 | 137750604 | -          | -               | -         | -       | -      | - | C | T |
| PD7516a | Substitution | 9  | 138223849 | 138223849 | -          | -               | -         | -       | -      | - | G | A |
| PD7516a | Substitution | 10 | 10154037  | 10154037  | -          | -               | -         | -       | -      | - | A | G |
| PD7516a | Substitution | 10 | 13533633  | 13533633  | BEND7      | CCDS7099.1      | Intronic  | -       | -      | - | A | C |
| PD7516a | Substitution | 10 | 16277115  | 16277115  | -          | -               | -         | -       | -      | - | T | G |
| PD7516a | Substitution | 10 | 16347949  | 16347949  | -          | -               | -         | -       | -      | - | C | A |
| PD7516a | Substitution | 10 | 18881272  | 18881272  | NSUN6      | CCDS7130.1      | Intronic  | -       | -      | - | C | T |
| PD7516a | Substitution | 10 | 23756835  | 23756835  | -          | -               | -         | -       | -      | - | T | C |
| PD7516a | Substitution | 10 | 24860648  | 24860648  | -          | -               | -         | -       | -      | - | G | A |
| PD7516a | Substitution | 10 | 36493491  | 36493491  | -          | -               | -         | -       | -      | - | A | T |
| PD7516a | Substitution | 10 | 37828353  | 37828353  | -          | -               | -         | -       | -      | - | C | T |
| PD7516a | Substitution | 10 | 54689713  | 54689713  | -          | -               | -         | -       | -      | - | G | A |
| PD7516a | Substitution | 10 | 54854693  | 54854693  | -          | -               | -         | -       | -      | - | C | G |
| PD7516a | Substitution | 10 | 58972239  | 58972239  | -          | -               | -         | -       | -      | - | G | A |
| PD7516a | Substitution | 10 | 59011843  | 59011843  | -          | -               | -         | -       | -      | - | A | G |
| PD7516a | Substitution | 10 | 62118058  | 62118058  | ANK3       | CCDS7258.1      | Intronic  | -       | -      | - | A | G |
| PD7516a | Indel        | 10 | 63186485  | 63186486  | -          | -               | -         | -       | -      | - | - | - |
| PD7516a | Substitution | 10 | 66921669  | 66921669  | -          | -               | -         | -       | -      | - | A | G |
| PD7516a | Substitution | 10 | 80192750  | 80192750  | -          | -               | -         | -       | -      | - | G | T |
| PD7516a | Substitution | 10 | 83960569  | 83960569  | NRG3       | CCDS31233.1     | Intronic  | -       | -      | - | C | T |
| PD7516a | Substitution | 10 | 86029804  | 86029804  | -          | -               | -         | -       | -      | - | T | A |
| PD7516a | Substitution | 10 | 86546229  | 86546229  | -          | -               | -         | -       | -      | - | A | T |
| PD7516a | Substitution | 10 | 94467144  | 94467144  | -          | -               | -         | -       | -      | - | T | A |
| PD7516a | Substitution | 10 | 117013090 | 117013090 | ATRNL1     | CCDS7592.1      | Intronic  | -       | -      | - | T | C |
| PD7516a | Indel        | 10 | 117174209 | 117174212 | -          | -               | -         | -       | -      | - | - | - |
| PD7516a | Substitution | 10 | 126064395 | 126064395 | -          | -               | -         | -       | -      | - | G | C |
| PD7516a | Substitution | 10 | 129997191 | 129997191 | -          | -               | -         | -       | -      | - | A | G |
| PD7516a | Substitution | 10 | 132467822 | 132467822 | -          | -               | -         | -       | -      | - | T | A |
| PD7516a | Substitution | 10 | 132475834 | 132475834 | -          | -               | -         | -       | -      | - | T | A |
| PD7516a | Substitution | 10 | 135424512 | 135424512 | -          | -               | -         | -       | -      | - | A | G |
| PD7516a | Substitution | 11 | 1560531   | 1560531   | -          | -               | -         | -       | -      | - | G | A |
| PD7516a | Substitution | 11 | 8160847   | 8160847   | RIC3       | CCDS7788.1      | Intronic  | -       | -      | - | T | C |
| PD7516a | Substitution | 11 | 8591535   | 8591535   | STK33      | CCDS7789.1      | Intronic  | -       | -      | - | G | T |
| PD7516a | Substitution | 11 | 10058753  | 10058753  | SBF2       | CCDS31427.1     | Intronic  | -       | -      | - | A | G |
| PD7516a | Substitution | 11 | 10768060  | 10768060  | -          | -               | -         | -       | -      | - | A | G |
| PD7516a | Substitution | 11 | 21461187  | 21461187  | NELL1      | CCDS7855.1      | Intronic  | -       | -      | - | A | G |
| PD7516a | Substitution | 11 | 24895826  | 24895826  | LUZP2      | CCDS31446.1     | Intronic  | -       | -      | - | C | A |
| PD7516a | Substitution | 11 | 25024336  | 25024336  | LUZP2      | CCDS31446.1     | Intronic  | -       | -      | - | G | T |
| PD7516a | Indel        | 11 | 28711530  | 28711532  | -          | -               | -         | -       | -      | - | - | - |
| PD7516a | Substitution | 11 | 30166128  | 30166128  | -          | -               | -         | -       | -      | - | A | G |
| PD7516a | Substitution | 11 | 39331295  | 39331295  | -          | -               | -         | -       | -      | - | G | A |
| PD7516a | Substitution | 11 | 40058360  | 40058360  | -          | -               | -         | -       | -      | - | A | G |
| PD7516a | Substitution | 11 | 41998087  | 41998087  | -          | -               | -         | -       | -      | - | T | C |
| PD7516a | Substitution | 11 | 42989601  | 42989601  | -          | -               | -         | -       | -      | - | C | T |
| PD7516a | Substitution | 11 | 50171037  | 50171037  | -          | -               | -         | -       | -      | - | T | G |
| PD7516a | Substitution | 11 | 55402863  | 55402863  | -          | -               | -         | -       | -      | - | G | T |
| PD7516a | Substitution | 11 | 59072329  | 59072329  | -          | -               | -         | -       | -      | - | G | T |
| PD7516a | Substitution | 11 | 63273122  | 63273122  | -          | -               | -         | -       | -      | - | A | T |
| PD7516a | Substitution | 11 | 66729374  | 66729374  | -          | -               | -         | -       | -      | - | G | T |
| PD7516a | Substitution | 11 | 79119221  | 79119221  | ODZ4       | CCDS44688.1     | Intronic  | -       | -      | - | T | C |
| PD7516a | Substitution | 11 | 83430337  | 83430337  | DLG2       | CCDS41696.1     | Intronic  | -       | -      | - | A | T |
| PD7516a | Substitution | 11 | 92530879  | 92530879  | FAT3       | CCDS44706.1     | Intronic  | -       | -      | - | A | T |
| PD7516a | Substitution | 11 | 94047220  | 94047220  | -          | -               | -         | -       | -      | - | G | A |
| PD7516a | Substitution | 11 | 97768390  | 97768390  | -          | -               | -         | -       | -      | - | T | A |
| PD7516a | Substitution | 11 | 105665593 | 105665593 | GRIA4      | CCDS41706.1     | Intronic  | -       | -      | - | A | C |
| PD7516a | Substitution | 11 | 109567235 | 109567235 | -          | -               | -         | -       | -      | - | T | A |
| PD7516a | Substitution | 11 | 110135397 | 110135397 | RDX        | CCDS8343.1      | Intronic  | -       | -      | - | T | C |
| PD7516a | Substitution | 11 | 125200064 | 125200064 | PKNOX2     | CCDS41730.1     | Intronic  | -       | -      | - | A | G |
| PD7516a | Substitution | 11 | 125574944 | 125574944 | -          | -               | -         | -       | -      | - | C | T |
| PD7516a | Substitution | 11 | 125826119 | 125826119 | -          | -               | -         | -       | -      | - | T | C |
| PD7516a | Substitution | 11 | 133634818 | 133634818 | -          | -               | -         | -       | -      | - | T | C |
| PD7516a | Substitution | 12 | 3520074   | 3520074   | -          | -               | -         | -       | -      | - | G | A |
| PD7516a | Substitution | 12 | 6661729   | 6661729   | IFFO1      | CCDS41741.1     | Intronic  | -       | -      | - | T | G |
| PD7516a | Substitution | 12 | 6862648   | 6862648   | -          | -               | -         | -       | -      | - | G | C |
| PD7516a | Substitution | 12 | 7910427   | 7910427   | -          | -               | -         | -       | -      | - | G | C |
| PD7516a | Substitution | 12 | 8002662   | 8002662   | SLC2A14    | CCDS8585.1      | Intronic  | -       | -      | - | T | A |
| PD7516a | Substitution | 12 | 17732249  | 17732249  | -          | -               | -         | -       | -      | - | G | A |
| PD7516a | Substitution | 12 | 32000886  | 32000886  | -          | -               | -         | -       | -      | - | C | A |
| PD7516a | Substitution | 12 | 44690847  | 44690847  | TMEM117    | CCDS8745.1      | Intronic  | -       | -      | - | G | A |
| PD7516a | Substitution | 12 | 55114025  | 55114025  | -          | -               | -         | -       | -      | - | T | C |
| PD7516a | Substitution | 12 | 57910337  | 57910337  | MARS       | CCDS8942.1      | c.2676A>G | p.E892E | Silent | - | A | G |
| PD7516a | Substitution | 12 | 59180358  | 59180358  | -          | -               | -         | -       | -      | - | C | T |
| PD7516a | Substitution | 12 | 61357478  | 61357478  | -          | -               | -         | -       | -      | - | A | T |
| PD7516a | Substitution | 12 | 64124895  | 64124895  | -          | -               | -         | -       | -      | - | A | T |
| PD7516a | Substitution | 12 | 70759888  | 70759888  | -          | -               | -         | -       | -      | - | G | A |
| PD7516a | Substitution | 12 | 79213692  | 79213692  | -          | -               | -         | -       | -      | - | A | T |
| PD7516a | Substitution | 12 | 84769920  | 84769920  | -          | -               | -         | -       | -      | - | T | A |
| PD7516a | Substitution | 12 | 87000873  | 87000873  | -          | -               | -         | -       | -      | - | G | C |
| PD7516a | Substitution | 12 | 90813776  | 90813776  | -          | -               | -         | -       | -      | - | A | C |
| PD7516a | Substitution | 12 | 95000600  | 95000600  | TMCC3      | CCDS31877.1     | Intronic  | -       | -      | - | A | G |
| PD7516a | Substitution | 12 | 100572002 | 100572002 | -          | -               | -         | -       | -      | - | G | C |
| PD7516a | Indel        | 12 | 109732774 | 109732774 | -          | -               | -         | -       | -      | - | - | - |
| PD7516a | Substitution | 12 | 113683727 | 113683727 | TPCN1      | CCDS31908.1     | Intronic  | -       | -      | - | C | T |
| PD7516a | Substitution | 12 | 127091843 | 127091843 | -          | -               | -         | -       | -      | - | C | T |
| PD7516a | Substitution | 12 | 130776085 | 130776085 | -          | -               | -         | -       | -      | - | C | T |
| PD7516a | Substitution | 13 | 22035009  | 22035009  | -          | -               | -         | -       | -      | - | C | A |
| PD7516a | Substitution | 13 | 41710268  | 41710268  | AL354696.6 | ENST00000499512 | Intronic  | -       | -      | - | C | A |
| PD7516a | Substitution | 13 | 43537810  | 43537810  | EPST11     | CCDS9387.1      | Intronic  | -       | -      | - | C | G |
| PD7516a | Substitution | 13 | 66806100  | 66806100  | -          | -               | -         | -       | -      | - | C | T |
| PD7516a | Substitution | 13 | 67398898  | 67398898  | PCDH9      | CCDS9443.1      | Intronic  | -       | -      | - | T | C |
| PD7516a | Substitution | 13 | 69651096  | 69651096  | -          | -               | -         | -       | -      | - | C | A |
| PD7516a | Substitution | 13 | 70498981  | 70498981  | KLHL1      | CCDS9445.1      | Intronic  | -       | -      | - | C | A |
| PD7516a | Substitution | 13 | 81550714  | 81550714  | -          | -               | -         | -       | -      | - | G | A |
| PD7516a | Substitution | 13 | 84047441  | 84047441  | -          | -               | -         | -       | -      | - | G | T |
| PD7516a | Substitution | 13 | 92293541  | 92293541  | GPC5       | CCDS9468.1      | Intronic  | -       | -      | - | C | T |
| PD7516a | Substitution | 13 | 97270978  | 97270978  | HS6ST3     | CCDS9481.1      | Intronic  | -       | -      | - | T | C |
| PD7516a | Substitution | 13 | 106422773 | 106422773 | -          | -               | -         | -       | -      | - | G | T |
| PD7516a | Substitution | 14 | 22455825  | 22455825  | -          | -               | -         | -       | -      | - | C | T |
| PD7516a | Indel        | 14 | 24346768  | 24346768  | -          | -               | -         | -       | -      | - | - | - |
| PD7516a | Substitution | 14 | 24367628  | 24367628  | -          | -               | -         | -       | -      | - | G | A |
| PD7516a | Substitution | 14 | 28883823  | 28883823  | -          | -               | -         | -       | -      | - | T | A |
| PD7516a | Substitution | 14 | 29389828  | 29389828  | -          | -               | -         | -       | -      | - | C | A |
| PD7516a | Substitution | 14 | 33953543  | 33953543  | NPAS3      | CCDS9645.1      | Intronic  | -       | -      | - | A | G |
| PD7516a | Substitution | 14 | 36846064  | 36846064  | -          | -               | -         | -       | -      | - | C | T |
| PD7516a | Substitution | 14 | 42194076  | 42194076  | LRFN5      | CCDS9678.1      | Intronic  | -       | -      | - | A | C |
| PD7516a | Substitution | 14 | 50541902  | 50541902  | -          | -               | -         | -       | -      | - | C | T |
| PD7516a | Substitution | 14 | 51176294  | 51176294  | AL358334.1 | ENST00000501589 | Intronic  | -       | -      | - | T | A |









|         |              |   |           |           |            |                 |          |   |   |   |   |   |
|---------|--------------|---|-----------|-----------|------------|-----------------|----------|---|---|---|---|---|
| PD7517a | Substitution | 5 | 169241184 | 169241184 | DOCK2      | CCDS4371.1      | Intronic | - | - | - | C | A |
| PD7517a | Substitution | 5 | 170812337 | 170812337 | -          | -               | -        | - | - | - | A | T |
| PD7517a | Substitution | 5 | 175982165 | 175982165 | CDHR2      | CCDS34297.1     | Intronic | - | - | - | C | T |
| PD7517a | Substitution | 5 | 180633475 | 180633475 | -          | -               | -        | - | - | - | A | G |
| PD7517a | Indel        | 6 | 6168444   | 6168444   | -          | -               | -        | - | - | - | - | - |
| PD7517a | Substitution | 6 | 10018403  | 10018403  | OFCC1      | ENST00000485268 | Intronic | - | - | - | C | A |
| PD7517a | Substitution | 6 | 23532212  | 23532212  | -          | -               | -        | - | - | - | C | A |
| PD7517a | Substitution | 6 | 33798406  | 33798406  | -          | -               | -        | - | - | - | T | C |
| PD7517a | Substitution | 6 | 42041964  | 42041964  | TAF8       | CCDS43462.1     | Intronic | - | - | - | C | T |
| PD7517a | Substitution | 6 | 47910795  | 47910795  | C6orf138   | ENST00000398738 | Intronic | - | - | - | A | T |
| PD7517a | Substitution | 6 | 49805900  | 49805900  | CRISP1     | CCDS4931.1      | Intronic | - | - | - | T | A |
| PD7517a | Substitution | 6 | 56864592  | 56864592  | BEND6      | CCDS43476.1     | Intronic | - | - | - | A | T |
| PD7517a | Substitution | 6 | 57869669  | 57869669  | -          | -               | -        | - | - | - | T | A |
| PD7517a | Substitution | 6 | 57990430  | 57990430  | -          | -               | -        | - | - | - | C | A |
| PD7517a | Indel        | 6 | 63456662  | 63456662  | -          | -               | -        | - | - | - | - | - |
| PD7517a | Substitution | 6 | 64876800  | 64876800  | EYS        | CCDS47445.1     | Intronic | - | - | - | C | T |
| PD7517a | Substitution | 6 | 73107072  | 73107072  | RIMS1      | CCDS47449.1     | Intronic | - | - | - | A | C |
| PD7517a | Substitution | 6 | 76412043  | 76412043  | SEN6       | CCDS47454.1     | Intronic | - | - | - | C | G |
| PD7517a | Substitution | 6 | 76694835  | 76694835  | IMPG1      | CCDS4985.1      | Intronic | - | - | - | G | T |
| PD7517a | Substitution | 6 | 77855910  | 77855910  | -          | -               | -        | - | - | - | C | A |
| PD7517a | Substitution | 6 | 84944075  | 84944075  | -          | -               | -        | - | - | - | C | T |
| PD7517a | Substitution | 6 | 86490920  | 86490920  | -          | -               | -        | - | - | - | A | T |
| PD7517a | Substitution | 6 | 88185263  | 88185263  | SLC35A1    | CCDS5010.1      | Intronic | - | - | - | T | C |
| PD7517a | Substitution | 6 | 90339846  | 90339846  | ANKRD6     | CCDS47460.1     | Intronic | - | - | - | C | T |
| PD7517a | Substitution | 6 | 96006323  | 96006323  | -          | -               | -        | - | - | - | T | A |
| PD7517a | Indel        | 6 | 100845630 | 100845630 | -          | -               | -        | - | - | - | - | - |
| PD7517a | Substitution | 6 | 107185662 | 107185662 | -          | -               | -        | - | - | - | C | A |
| PD7517a | Substitution | 6 | 110698776 | 110698776 | -          | -               | -        | - | - | - | C | T |
| PD7517a | Substitution | 6 | 112572916 | 112572916 | LAMA4      | CCDS34514.1     | Intronic | - | - | - | C | T |
| PD7517a | Substitution | 6 | 113988810 | 113988810 | -          | -               | -        | - | - | - | C | A |
| PD7517a | Substitution | 6 | 116192253 | 116192253 | -          | -               | -        | - | - | - | C | T |
| PD7517a | Substitution | 6 | 116475305 | 116475305 | NT5DC1     | CCDS5104.1      | Intronic | - | - | - | T | C |
| PD7517a | Substitution | 6 | 120312860 | 120312860 | -          | -               | -        | - | - | - | G | A |
| PD7517a | Substitution | 6 | 123645958 | 123645958 | TRDN       | ENST00000334268 | Intronic | - | - | - | T | A |
| PD7517a | Substitution | 6 | 133701963 | 133701963 | EYA4       | CCDS5166.1      | Intronic | - | - | - | C | T |
| PD7517a | Substitution | 6 | 139674096 | 139674096 | -          | -               | -        | - | - | - | C | T |
| PD7517a | Substitution | 6 | 147099191 | 147099191 | C6orf103   | CCDS47498.1     | Intronic | - | - | - | C | T |
| PD7517a | Substitution | 6 | 154182093 | 154182093 | -          | -               | -        | - | - | - | C | A |
| PD7517a | Substitution | 6 | 161441802 | 161441802 | MAP3K4     | CCDS34565.1     | Intronic | - | - | - | G | A |
| PD7517a | Substitution | 6 | 168153789 | 168153789 | -          | -               | -        | - | - | - | C | G |
| PD7517a | Substitution | 7 | 5550470   | 5550470   | FBXL18     | CCDS43546.1     | Intronic | - | - | - | C | T |
| PD7517a | Substitution | 7 | 7404174   | 7404174   | COL28A1    | CCDS43553.1     | Intronic | - | - | - | G | A |
| PD7517a | Substitution | 7 | 10603400  | 10603400  | -          | -               | -        | - | - | - | A | T |
| PD7517a | Substitution | 7 | 26409724  | 26409724  | SNX10      | CCDS5399.1      | Intronic | - | - | - | G | T |
| PD7517a | Substitution | 7 | 29263684  | 29263684  | CHN2       | CCDS5420.1      | Intronic | - | - | - | T | G |
| PD7517a | Substitution | 7 | 33009107  | 33009107  | FKBP9      | CCDS5439.1      | Intronic | - | - | - | C | A |
| PD7517a | Substitution | 7 | 40434669  | 40434669  | C7orf10    | ENST00000309930 | Intronic | - | - | - | A | T |
| PD7517a | Substitution | 7 | 41888655  | 41888655  | -          | -               | -        | - | - | - | C | A |
| PD7517a | Substitution | 7 | 42961888  | 42961888  | PSMA2      | CCDS5467.1      | Intronic | - | - | - | A | G |
| PD7517a | Substitution | 7 | 43674387  | 43674387  | AC005189.1 | ENST00000509705 | Intronic | - | - | - | G | T |
| PD7517a | Substitution | 7 | 51136686  | 51136686  | COBL       | CCDS34637.1     | Intronic | - | - | - | C | T |
| PD7517a | Substitution | 7 | 55860216  | 55860216  | -          | -               | -        | - | - | - | G | T |
| PD7517a | Substitution | 7 | 56460257  | 56460257  | -          | -               | -        | - | - | - | G | T |
| PD7517a | Substitution | 7 | 57216966  | 57216966  | -          | -               | -        | - | - | - | A | C |
| PD7517a | Substitution | 7 | 63630504  | 63630504  | -          | -               | -        | - | - | - | G | A |
| PD7517a | Substitution | 7 | 64475633  | 64475633  | -          | -               | -        | - | - | - | G | A |
| PD7517a | Substitution | 7 | 67536375  | 67536375  | -          | -               | -        | - | - | - | G | A |
| PD7517a | Substitution | 7 | 68830528  | 68830528  | -          | -               | -        | - | - | - | T | A |
| PD7517a | Substitution | 7 | 83676245  | 83676245  | SEMA3A     | CCDS5599.1      | Intronic | - | - | - | G | T |
| PD7517a | Substitution | 7 | 84022314  | 84022314  | SEMA3A     | ENST00000424555 | Intronic | - | - | - | C | A |
| PD7517a | Substitution | 7 | 92202439  | 92202439  | FAM133B    | CCDS47641.1     | Intronic | - | - | - | G | A |
| PD7517a | Substitution | 7 | 94797905  | 94797905  | PPP1R9A    | CCDS34683.1     | Intronic | - | - | - | T | A |
| PD7517a | Substitution | 7 | 106038289 | 106038289 | -          | -               | -        | - | - | - | A | T |
| PD7517a | Substitution | 7 | 106120509 | 106120509 | -          | -               | -        | - | - | - | A | C |
| PD7517a | Substitution | 7 | 108358449 | 108358449 | -          | -               | -        | - | - | - | G | T |
| PD7517a | Substitution | 7 | 112591422 | 112591422 | -          | -               | -        | - | - | - | G | C |
| PD7517a | Substitution | 7 | 113439521 | 113439521 | -          | -               | -        | - | - | - | A | G |
| PD7517a | Substitution | 7 | 118396781 | 118396781 | -          | -               | -        | - | - | - | G | A |
| PD7517a | Substitution | 7 | 118665537 | 118665537 | -          | -               | -        | - | - | - | T | A |
| PD7517a | Substitution | 7 | 120097123 | 120097123 | KCND2      | CCDS5776.1      | Intronic | - | - | - | G | A |
| PD7517a | Substitution | 7 | 122961759 | 122961759 | -          | -               | -        | - | - | - | G | A |
| PD7517a | Substitution | 7 | 124403004 | 124403004 | GPR37      | CCDS5792.1      | Intronic | - | - | - | T | A |
| PD7517a | Substitution | 7 | 131476791 | 131476791 | -          | -               | -        | - | - | - | G | A |
| PD7517a | Substitution | 7 | 146647582 | 146647582 | CNTNAP2    | CCDS5889.1      | Intronic | - | - | - | T | G |
| PD7517a | Substitution | 7 | 147510234 | 147510234 | CNTNAP2    | CCDS5889.1      | Intronic | - | - | - | A | T |
| PD7517a | Substitution | 7 | 158963837 | 158963837 | -          | -               | -        | - | - | - | C | T |
| PD7517a | Substitution | 8 | 6283786   | 6283786   | MCPH1      | CCDS43689.1     | Intronic | - | - | - | C | T |
| PD7517a | Substitution | 8 | 6507870   | 6507870   | -          | -               | -        | - | - | - | A | T |
| PD7517a | Substitution | 8 | 7226544   | 7226544   | ZNF705G    | CCDS47773.1     | Intronic | - | - | - | C | T |
| PD7517a | Substitution | 8 | 9837455   | 9837455   | -          | -               | -        | - | - | - | T | C |
| PD7517a | Substitution | 8 | 13609560  | 13609560  | -          | -               | -        | - | - | - | G | A |
| PD7517a | Substitution | 8 | 14484399  | 14484399  | SGCZ       | CCDS5992.2      | Intronic | - | - | - | T | A |
| PD7517a | Substitution | 8 | 14759932  | 14759932  | SGCZ       | CCDS5992.2      | Intronic | - | - | - | T | C |
| PD7517a | Substitution | 8 | 16613443  | 16613443  | -          | -               | -        | - | - | - | G | T |
| PD7517a | Substitution | 8 | 19501538  | 19501538  | CSGALNACT1 | CCDS6010.1      | Intronic | - | - | - | G | A |
| PD7517a | Substitution | 8 | 20516856  | 20516856  | -          | -               | -        | - | - | - | T | C |
| PD7517a | Substitution | 8 | 27256283  | 27256283  | PTK2B      | CCDS6057.1      | Intronic | - | - | - | A | G |
| PD7517a | Indel        | 8 | 32261664  | 32261664  | -          | -               | -        | - | - | - | - | - |
| PD7517a | Substitution | 8 | 32808433  | 32808433  | -          | -               | -        | - | - | - | T | C |
| PD7517a | Substitution | 8 | 36217190  | 36217190  | -          | -               | -        | - | - | - | C | A |
| PD7517a | Substitution | 8 | 39125633  | 39125633  | ADAM32     | CCDS47846.1     | Intronic | - | - | - | C | T |
| PD7517a | Substitution | 8 | 40611568  | 40611568  | ZMAT4      | CCDS34885.1     | Intronic | - | - | - | G | T |
| PD7517a | Indel        | 8 | 47283508  | 47283508  | -          | -               | -        | - | - | - | - | - |
| PD7517a | Substitution | 8 | 53049254  | 53049254  | ST18       | CCDS6149.1      | Intronic | - | - | - | C | G |
| PD7517a | Substitution | 8 | 53315676  | 53315676  | ST18       | CCDS6149.1      | Intronic | - | - | - | G | C |
| PD7517a | Indel        | 8 | 58568345  | 58568345  | -          | -               | -        | - | - | - | - | - |
| PD7517a | Substitution | 8 | 68849751  | 68849751  | -          | -               | -        | - | - | - | C | A |
| PD7517a | Substitution | 8 | 69898442  | 69898442  | -          | -               | -        | - | - | - | G | A |
| PD7517a | Substitution | 8 | 73521722  | 73521722  | KCNB2      | CCDS6209.1      | Intronic | - | - | - | A | T |
| PD7517a | Substitution | 8 | 74218987  | 74218987  | RDH10      | CCDS6213.1      | Intronic | - | - | - | G | A |
| PD7517a | Substitution | 8 | 80600067  | 80600067  | -          | -               | -        | - | - | - | G | A |
| PD7517a | Substitution | 8 | 84275550  | 84275550  | -          | -               | -        | - | - | - | G | A |
| PD7517a | Substitution | 8 | 87395237  | 87395237  | WWP1       | CCDS6242.1      | Intronic | - | - | - | A | T |
| PD7517a | Substitution | 8 | 87634897  | 87634897  | CNGB3      | CCDS6244.1      | Intronic | - | - | - | C | A |
| PD7517a | Substitution | 8 | 106807175 | 106807175 | ZFPM2      | CCDS47908.1     | Intronic | - | - | - | C | T |
| PD7517a | Substitution | 8 | 111281427 | 111281427 | -          | -               | -        | - | - | - | G | A |
| PD7517a | Substitution | 8 | 111896849 | 111896849 | -          | -               | -        | - | - | - | G | T |
| PD7517a | Substitution | 8 | 112713413 | 112713413 | -          | -               | -        | - | - | - | G | C |
| PD7517a | Substitution | 8 | 113556201 | 113556201 | CSMD3      | CCDS6315.1      | Intronic | - | - | - | A | T |
| PD7517a | Substitution | 8 | 126675712 | 126675712 | -          | -               | -        | - | - | - | C | A |
| PD7517a | Substitution | 8 | 128072067 | 128072067 | -          | -               | -        | - | - | - | G | A |



|         |              |    |           |           |                 |                 |            |           |            |   |   |   |
|---------|--------------|----|-----------|-----------|-----------------|-----------------|------------|-----------|------------|---|---|---|
| PD7517a | Substitution | 13 | 69524186  | 69524186  | -               | -               | -          | -         | -          | - | C | T |
| PD7517a | Substitution | 13 | 75623624  | 75623624  | -               | -               | -          | -         | -          | - | C | T |
| PD7517a | Substitution | 13 | 91062718  | 91062718  | -               | -               | -          | -         | -          | - | C | A |
| PD7517a | Substitution | 13 | 91147254  | 91147254  | -               | -               | -          | -         | -          | - | C | T |
| PD7517a | Substitution | 13 | 103911616 | 103911616 | -               | -               | -          | -         | -          | - | T | G |
| PD7517a | Substitution | 13 | 105966202 | 105966202 | -               | -               | -          | -         | -          | - | C | T |
| PD7517a | Substitution | 13 | 107728268 | 107728268 | -               | -               | -          | -         | -          | - | G | A |
| PD7517a | Substitution | 13 | 111081903 | 111081903 | COL4A2          | CCDS41907.1     | Intronic   | -         | -          | - | C | T |
| PD7517a | Substitution | 14 | 25075023  | 25075023  | -               | -               | -          | -         | -          | - | T | C |
| PD7517a | Substitution | 14 | 28432788  | 28432788  | -               | -               | -          | -         | -          | - | G | T |
| PD7517a | Substitution | 14 | 42817140  | 42817140  | -               | -               | -          | -         | -          | - | C | G |
| PD7517a | Substitution | 14 | 42817141  | 42817141  | -               | -               | -          | -         | -          | - | C | A |
| PD7517a | Indel        | 14 | 62869193  | 62869193  | -               | -               | -          | -         | -          | - | - | - |
| PD7517a | Substitution | 14 | 75951247  | 75951247  | -               | -               | -          | -         | -          | - | G | T |
| PD7517a | Substitution | 14 | 79379333  | 79379333  | NRXN3           | CCDS9870.1      | Intronic   | -         | -          | - | A | C |
| PD7517a | Substitution | 14 | 80137869  | 80137869  | NRXN3           | CCDS45145.1     | Intronic   | -         | -          | - | T | A |
| PD7517a | Substitution | 14 | 81422473  | 81422473  | TSHR            | CCDS9872.1      | Intronic   | -         | -          | - | G | A |
| PD7517a | Substitution | 14 | 83602553  | 83602553  | -               | -               | -          | -         | -          | - | G | A |
| PD7517a | Substitution | 14 | 85222293  | 85222293  | -               | -               | -          | -         | -          | - | C | A |
| PD7517a | Substitution | 14 | 88555982  | 88555982  | -               | -               | -          | -         | -          | - | G | A |
| PD7517a | Substitution | 14 | 92724019  | 92724019  | -               | -               | -          | -         | -          | - | G | A |
| PD7517a | Substitution | 14 | 95997214  | 95997214  | -               | -               | -          | -         | -          | - | A | T |
| PD7517a | Substitution | 14 | 102440784 | 102440784 | DYNC1H1         | CCDS9966.1      | Intronic   | -         | -          | - | A | G |
| PD7517a | Substitution | 14 | 106230532 | 106230532 | -               | -               | -          | -         | -          | - | C | T |
| PD7517a | Substitution | 15 | 20059084  | 20059084  | ENSG00000215567 | ENST00000413399 | c.34C>T    | p.Q12*    | Nonsense   | - | C | T |
| PD7517a | Substitution | 15 | 25072085  | 25072085  | SNRPN           | CCDS10017.1     | Intronic   | -         | -          | - | G | A |
| PD7517a | Substitution | 15 | 28277557  | 28277557  | OCA2            | CCDS10020.1     | Intronic   | -         | -          | - | A | G |
| PD7517a | Substitution | 15 | 49318219  | 49318219  | SECISBP2L       | CCDS32234.1     | Intronic   | -         | -          | - | A | T |
| PD7517a | Substitution | 15 | 70938583  | 70938583  | -               | -               | -          | -         | -          | - | A | C |
| PD7517a | Substitution | 15 | 86753988  | 86753988  | AGBL1           | ENST00000421325 | Intronic   | -         | -          | - | G | A |
| PD7517a | Substitution | 15 | 88678180  | 88678180  | NTRK3           | CCDS10340.1     | Intronic   | -         | -          | - | G | A |
| PD7517a | Substitution | 15 | 93978720  | 93978720  | -               | -               | -          | -         | -          | - | C | T |
| PD7517a | Substitution | 15 | 97839409  | 97839409  | -               | -               | -          | -         | -          | - | C | A |
| PD7517a | Substitution | 16 | 6474295   | 6474295   | -               | -               | -          | -         | -          | - | G | T |
| PD7517a | Substitution | 16 | 9857819   | 9857819   | GRIN2A          | CCDS10539.1     | c.3582A>G  | p.K1194K  | Silent     | - | T | C |
| PD7517a | Substitution | 16 | 12637530  | 12637530  | SNX29           | CCDS45416.1     | Intronic   | -         | -          | - | T | C |
| PD7517a | Substitution | 16 | 17606842  | 17606842  | -               | -               | -          | -         | -          | - | G | C |
| PD7517a | Substitution | 16 | 22766796  | 22766796  | ENSG00000224154 | ENST00000430965 | Intronic   | -         | -          | - | A | G |
| PD7517a | Substitution | 16 | 29836087  | 29836087  | MVP             | CCDS10656.1     | Intronic   | -         | -          | - | G | T |
| PD7517a | Substitution | 16 | 33589902  | 33589902  | -               | -               | -          | -         | -          | - | C | G |
| PD7517a | Substitution | 16 | 52135034  | 52135034  | -               | -               | -          | -         | -          | - | C | T |
| PD7517a | Substitution | 16 | 60602272  | 60602272  | -               | -               | -          | -         | -          | - | C | A |
| PD7517a | Substitution | 16 | 71529154  | 71529154  | -               | -               | -          | -         | -          | - | G | A |
| PD7517a | Substitution | 16 | 83452436  | 83452436  | CDH13           | ENST00000268613 | Intronic   | -         | -          | - | C | T |
| PD7517a | Substitution | 16 | 84455678  | 84455678  | ATP2C2          | CCDS42207.1     | Intronic   | -         | -          | - | C | A |
| PD7517a | Substitution | 16 | 89018843  | 89018843  | CBFA2T3         | CCDS10972.1     | Intronic   | -         | -          | - | G | A |
| PD7517a | Substitution | 17 | 3093317   | 3093317   | -               | -               | -          | -         | -          | - | C | T |
| PD7517a | Substitution | 17 | 9743542   | 9743542   | GLP2R           | CCDS11150.1     | Intronic   | -         | -          | - | T | G |
| PD7517a | Substitution | 17 | 13323071  | 13323071  | -               | -               | -          | -         | -          | - | C | A |
| PD7517a | Substitution | 17 | 15595745  | 15595745  | -               | -               | -          | -         | -          | - | C | A |
| PD7517a | Substitution | 17 | 20802903  | 20802903  | -               | -               | -          | -         | -          | - | A | T |
| PD7517a | Substitution | 17 | 31550497  | 31550497  | ACCN1           | CCDS11276.1     | Intronic   | -         | -          | - | G | A |
| PD7517a | Substitution | 17 | 31645966  | 31645966  | ACCN1           | CCDS42296.1     | Intronic   | -         | -          | - | T | A |
| PD7517a | Substitution | 17 | 32840140  | 32840140  | -               | -               | -          | -         | -          | - | A | T |
| PD7517a | Substitution | 17 | 45252634  | 45252634  | CDC27           | CCDS45720.1     | Intronic   | -         | -          | - | A | T |
| PD7517a | Substitution | 17 | 68211089  | 68211089  | -               | -               | -          | -         | -          | - | G | T |
| PD7517a | Substitution | 17 | 68223374  | 68223374  | -               | -               | -          | -         | -          | - | G | T |
| PD7517a | Substitution | 17 | 68973045  | 68973045  | -               | -               | -          | -         | -          | - | T | C |
| PD7517a | Substitution | 17 | 73775146  | 73775146  | H3F3B           | CCDS11729.1     | c.110A>T   | p.K37M    | Missense   | - | T | A |
| PD7517a | Substitution | 17 | 79128901  | 79128901  | AATK            | CCDS45807.1     | Intronic   | -         | -          | - | C | T |
| PD7517a | Substitution | 18 | 3866942   | 3866942   | DLGAP1          | CCDS11836.1     | Intronic   | -         | -          | - | G | A |
| PD7517a | Substitution | 18 | 4577137   | 4577137   | -               | -               | -          | -         | -          | - | A | T |
| PD7517a | Substitution | 18 | 7162447   | 7162447   | -               | -               | -          | -         | -          | - | C | G |
| PD7517a | Substitution | 18 | 22798123  | 22798123  | ZNF521          | CCDS32806.1     | Intronic   | -         | -          | - | A | G |
| PD7517a | Substitution | 18 | 26687115  | 26687115  | -               | -               | -          | -         | -          | - | T | C |
| PD7517a | Substitution | 18 | 30559081  | 30559081  | C18orf34        | CCDS42424.1     | Intronic   | -         | -          | - | G | T |
| PD7517a | Substitution | 18 | 32548572  | 32548572  | -               | -               | -          | -         | -          | - | G | C |
| PD7517a | Substitution | 18 | 33997910  | 33997910  | FHOD3           | CCDS32816.1     | Intronic   | -         | -          | - | G | C |
| PD7517a | Substitution | 18 | 36806892  | 36806892  | AC105201.1      | ENST00000510201 | Intronic   | -         | -          | - | G | C |
| PD7517a | Substitution | 18 | 37771154  | 37771154  | -               | -               | -          | -         | -          | - | G | C |
| PD7517a | Substitution | 18 | 47212566  | 47212566  | -               | -               | -          | -         | -          | - | G | T |
| PD7517a | Substitution | 18 | 49883396  | 49883396  | DCC             | CCDS11952.1     | Intronic   | -         | -          | - | A | C |
| PD7517a | Substitution | 18 | 62253424  | 62253424  | -               | -               | -          | -         | -          | - | G | A |
| PD7517a | Substitution | 18 | 63163740  | 63163740  | -               | -               | -          | -         | -          | - | A | G |
| PD7517a | Substitution | 18 | 69492741  | 69492741  | -               | -               | -          | -         | -          | - | C | A |
| PD7517a | Substitution | 18 | 70272117  | 70272117  | -               | -               | -          | -         | -          | - | A | T |
| PD7517a | Substitution | 18 | 71975299  | 71975299  | -               | -               | -          | -         | -          | - | G | A |
| PD7517a | Substitution | 18 | 72089783  | 72089783  | -               | -               | -          | -         | -          | - | G | T |
| PD7517a | Substitution | 18 | 75813338  | 75813338  | -               | -               | -          | -         | -          | - | G | A |
| PD7517a | Substitution | 18 | 77514135  | 77514135  | CTDP1           | CCDS12017.1     | Non-coding | r.3378c>u | 3prime UTR | - | C | T |
| PD7517a | Substitution | 19 | 4282283   | 4282283   | SHD             | CCDS12125.1     | Intronic   | -         | -          | - | G | A |
| PD7517a | Substitution | 19 | 6435422   | 6435422   | -               | -               | -          | -         | -          | - | G | A |
| PD7517a | Substitution | 19 | 11057354  | 11057354  | -               | -               | -          | -         | -          | - | T | C |
| PD7517a | Substitution | 19 | 33545453  | 33545453  | RHPN2           | CCDS12427.1     | Intronic   | -         | -          | - | C | T |
| PD7517a | Substitution | 19 | 58194434  | 58194434  | ZNF551          | CCDS12959.1     | Intronic   | -         | -          | - | A | G |
| PD7517a | Substitution | 20 | 21179724  | 21179724  | -               | -               | -          | -         | -          | - | G | A |
| PD7517a | Substitution | 20 | 24296118  | 24296118  | -               | -               | -          | -         | -          | - | G | A |
| PD7517a | Substitution | 20 | 38919661  | 38919661  | -               | -               | -          | -         | -          | - | T | C |
| PD7517a | Substitution | 20 | 42804768  | 42804768  | JPH2            | CCDS13325.1     | Intronic   | -         | -          | - | T | C |
| PD7517a | Substitution | 20 | 43420074  | 43420074  | RIMS4           | CCDS13338.1     | Intronic   | -         | -          | - | C | T |
| PD7517a | Substitution | 20 | 48358710  | 48358710  | -               | -               | -          | -         | -          | - | T | G |
| PD7517a | Substitution | 20 | 56667573  | 56667573  | -               | -               | -          | -         | -          | - | G | T |
| PD7517a | Substitution | 21 | 16273549  | 16273549  | -               | -               | -          | -         | -          | - | A | G |
| PD7517a | Substitution | 21 | 18287565  | 18287565  | -               | -               | -          | -         | -          | - | C | T |
| PD7517a | Substitution | 21 | 19759506  | 19759506  | PRSS7           | CCDS13571.1     | Intronic   | -         | -          | - | T | A |
| PD7517a | Substitution | 21 | 21109364  | 21109364  | -               | -               | -          | -         | -          | - | T | A |
| PD7517a | Substitution | 21 | 23403459  | 23403459  | -               | -               | -          | -         | -          | - | T | A |
| PD7517a | Substitution | 21 | 23765918  | 23765918  | -               | -               | -          | -         | -          | - | T | A |
| PD7517a | Substitution | 21 | 35035051  | 35035051  | ITSN1           | CCDS33545.1     | Intronic   | -         | -          | - | C | T |
| PD7517a | Substitution | 21 | 39393340  | 39393340  | DISCR4          | ENST00000398948 | Intronic   | -         | -          | - | G | A |
| PD7517a | Substitution | 21 | 45654033  | 45654033  | ICOSLG          | CCDS42952.1     | Intronic   | -         | -          | - | C | A |
| PD7517a | Substitution | 22 | 17231207  | 17231207  | -               | -               | -          | -         | -          | - | T | C |
| PD7517a | Substitution | 22 | 19097611  | 19097611  | DGCR2           | CCDS33598.1     | Intronic   | -         | -          | - | T | A |
| PD7517a | Substitution | 22 | 22247861  | 22247861  | -               | -               | -          | -         | -          | - | C | A |
| PD7517a | Substitution | 22 | 29271334  | 29271334  | -               | -               | -          | -         | -          | - | G | A |
| PD7517a | Substitution | 22 | 29383867  | 29383867  | ZNRF3           | CCDS42999.1     | Intronic   | -         | -          | - | G | A |
| PD7517a | Substitution | 22 | 31709453  | 31709453  | -               | -               | -          | -         | -          | - | C | T |
| PD7517a | Substitution | 22 | 34277705  | 34277705  | LARGE           | CCDS13912.1     | Intronic   | -         | -          | - | G | A |
| PD7517a | Substitution | 22 | 34578998  | 34578998  | -               | -               | -          | -         | -          | - | C | T |
| PD7517a | Substitution | 22 | 34592871  | 34592871  | -               | -               | -          | -         | -          | - | A | T |
| PD7517a | Substitution | 22 | 40509228  | 40509228  | TNRC6B          | CCDS46712.1     | Intronic   | -         | -          | - | A | T |

|         |              |    |           |           |            |                 |          |        |          |   |   |   |   |
|---------|--------------|----|-----------|-----------|------------|-----------------|----------|--------|----------|---|---|---|---|
| PD7517a | Substitution | 22 | 48454293  | 48454293  | -          | -               | -        | -      | -        | - | - | A | T |
| PD7517a | Substitution | X  | 5175920   | 5175920   | -          | -               | -        | -      | -        | - | - | G | T |
| PD7517a | Substitution | X  | 25925459  | 25925459  | -          | -               | -        | -      | -        | - | - | T | C |
| PD7517a | Substitution | X  | 27433376  | 27433376  | -          | -               | -        | -      | -        | - | - | G | A |
| PD7517a | Substitution | X  | 33416985  | 33416985  | -          | -               | -        | -      | -        | - | - | A | G |
| PD7517a | Substitution | X  | 35991146  | 35991146  | CXorf22    | CCDS14237.2     | Intronic | -      | -        | - | - | C | A |
| PD7517a | Substitution | X  | 62149076  | 62149076  | -          | -               | -        | -      | -        | - | - | G | A |
| PD7517a | Substitution | X  | 81104959  | 81104959  | -          | -               | -        | -      | -        | - | - | G | C |
| PD7517a | Substitution | X  | 82485229  | 82485229  | -          | -               | -        | -      | -        | - | - | C | G |
| PD7517a | Substitution | X  | 86717098  | 86717098  | -          | -               | -        | -      | -        | - | - | C | T |
| PD7517a | Substitution | X  | 90318931  | 90318931  | -          | -               | -        | -      | -        | - | - | G | A |
| PD7517a | Substitution | X  | 97363830  | 97363830  | -          | -               | -        | -      | -        | - | - | A | G |
| PD7517a | Substitution | X  | 113963651 | 113963651 | HTR2C      | CCDS14564.1     | Intronic | -      | -        | - | - | A | G |
| PD7517a | Substitution | X  | 117217032 | 117217032 | KLHL13     | ENST00000371882 | Intronic | -      | -        | - | - | T | C |
| PD7517a | Substitution | X  | 124223013 | 124223013 | -          | -               | -        | -      | -        | - | - | C | G |
| PD7517a | Substitution | X  | 125424849 | 125424849 | -          | -               | -        | -      | -        | - | - | C | A |
| PD7517a | Substitution | X  | 131646223 | 131646223 | -          | -               | -        | -      | -        | - | - | T | C |
| PD7517a | Substitution | X  | 139129430 | 139129430 | -          | -               | -        | -      | -        | - | - | G | T |
| PD7517a | Substitution | X  | 140835371 | 140835371 | -          | -               | -        | -      | -        | - | - | A | T |
| PD7517a | Substitution | Y  | 4745449   | 4745449   | -          | -               | -        | -      | -        | - | - | A | G |
| PD7517a | Substitution | Y  | 18918278  | 18918278  | -          | -               | -        | -      | -        | - | - | C | A |
| PD7517a | Substitution | Y  | 23740344  | 23740344  | -          | -               | -        | -      | -        | - | - | G | C |
| PD7518a | Substitution | 1  | 6215355   | 6215355   | CHD5       | CCDS57.1        | Intronic | -      | -        | - | - | C | T |
| PD7518a | Substitution | 1  | 12319624  | 12319624  | VPS13D     | CCDS30588.1     | Intronic | -      | -        | - | - | G | A |
| PD7518a | Substitution | 1  | 13894257  | 13894257  | -          | -               | -        | -      | -        | - | - | G | A |
| PD7518a | Substitution | 1  | 22946496  | 22946496  | -          | -               | -        | -      | -        | - | - | C | T |
| PD7518a | Substitution | 1  | 37020816  | 37020816  | -          | -               | -        | -      | -        | - | - | G | A |
| PD7518a | Substitution | 1  | 42090148  | 42090148  | HIVEP3     | CCDS44124.1     | Intronic | -      | -        | - | - | G | T |
| PD7518a | Substitution | 1  | 49759992  | 49759992  | AGBL4      | CCDS44137.1     | Intronic | -      | -        | - | - | T | A |
| PD7518a | Substitution | 1  | 61552111  | 61552111  | NFIA       | CCDS44156.1     | Intronic | -      | -        | - | - | T | A |
| PD7518a | Substitution | 1  | 63969568  | 63969568  | ITGB3BP    | CCDS30736.1     | Intronic | -      | -        | - | - | G | T |
| PD7518a | Indel        | 1  | 64221682  | 64221682  | -          | -               | -        | -      | -        | - | - | - | - |
| PD7518a | Substitution | 1  | 69994062  | 69994062  | -          | -               | -        | -      | -        | - | - | A | C |
| PD7518a | Substitution | 1  | 81441946  | 81441946  | -          | -               | -        | -      | -        | - | - | A | G |
| PD7518a | Substitution | 1  | 84409004  | 84409004  | TTL7       | CCDS690.2       | Intronic | -      | -        | - | - | G | A |
| PD7518a | Substitution | 1  | 95879962  | 95879962  | -          | -               | -        | -      | -        | - | - | G | A |
| PD7518a | Substitution | 1  | 96129177  | 96129177  | -          | -               | -        | -      | -        | - | - | C | T |
| PD7518a | Substitution | 1  | 101606858 | 101606858 | -          | -               | -        | -      | -        | - | - | G | A |
| PD7518a | Substitution | 1  | 103012516 | 103012516 | -          | -               | -        | -      | -        | - | - | C | T |
| PD7518a | Substitution | 1  | 106456723 | 106456723 | -          | -               | -        | -      | -        | - | - | G | T |
| PD7518a | Substitution | 1  | 106943888 | 106943888 | -          | -               | -        | -      | -        | - | - | G | T |
| PD7518a | Substitution | 1  | 110441624 | 110441624 | -          | -               | -        | -      | -        | - | - | G | A |
| PD7518a | Substitution | 1  | 115079132 | 115079132 | -          | -               | -        | -      | -        | - | - | A | T |
| PD7518a | Substitution | 1  | 115947820 | 115947820 | -          | -               | -        | -      | -        | - | - | G | A |
| PD7518a | Substitution | 1  | 119897531 | 119897531 | -          | -               | -        | -      | -        | - | - | A | T |
| PD7518a | Substitution | 1  | 119954550 | 119954550 | AL121995.1 | ENST00000506663 | Intronic | -      | -        | - | - | G | A |
| PD7518a | Substitution | 1  | 164657755 | 164657755 | PBX1       | CCDS1246.1      | Intronic | -      | -        | - | - | C | T |
| PD7518a | Substitution | 1  | 173990295 | 173990295 | -          | -               | -        | -      | -        | - | - | G | T |
| PD7518a | Substitution | 1  | 174810710 | 174810710 | RABGAP1L   | CCDS1314.1      | Intronic | -      | -        | - | - | G | A |
| PD7518a | Substitution | 1  | 177880909 | 177880909 | -          | -               | -        | -      | -        | - | - | G | A |
| PD7518a | Substitution | 1  | 182306538 | 182306538 | -          | -               | -        | -      | -        | - | - | T | C |
| PD7518a | Substitution | 1  | 186040705 | 186040705 | HMCN1      | CCDS30956.1     | Intronic | -      | -        | - | - | C | A |
| PD7518a | Substitution | 1  | 194330552 | 194330552 | -          | -               | -        | -      | -        | - | - | G | C |
| PD7518a | Substitution | 1  | 200682220 | 200682220 | -          | -               | -        | -      | -        | - | - | G | A |
| PD7518a | Substitution | 1  | 202626187 | 202626187 | SYT2       | CCDS1427.1      | Intronic | -      | -        | - | - | T | C |
| PD7518a | Substitution | 1  | 210889506 | 210889506 | KCNH1      | CCDS31015.1     | Intronic | -      | -        | - | - | C | T |
| PD7518a | Substitution | 1  | 216840477 | 216840477 | ESRRG      | CCDS1517.1      | Intronic | -      | -        | - | - | G | A |
| PD7518a | Substitution | 1  | 221633218 | 221633218 | -          | -               | -        | -      | -        | - | - | T | A |
| PD7518a | Substitution | 1  | 225734622 | 225734622 | ENAH       | CCDS31041.1     | Intronic | -      | -        | - | - | G | C |
| PD7518a | Substitution | 1  | 226252162 | 226252162 | H3F3A      | CCDS1550.1      | c.110A>T | p.K37M | Missense | - | - | A | T |
| PD7518a | Substitution | 1  | 230394088 | 230394088 | GALNT2     | CCDS1582.1      | Intronic | -      | -        | - | - | G | C |
| PD7518a | Substitution | 1  | 232410650 | 232410650 | -          | -               | -        | -      | -        | - | - | G | A |
| PD7518a | Substitution | 1  | 237733418 | 237733418 | RYR2       | ENST00000366574 | Intronic | -      | -        | - | - | T | C |
| PD7518a | Substitution | 1  | 238255234 | 238255234 | -          | -               | -        | -      | -        | - | - | G | A |
| PD7518a | Substitution | 1  | 238933935 | 238933935 | -          | -               | -        | -      | -        | - | - | T | A |
| PD7518a | Substitution | 1  | 240599269 | 240599269 | FMN2       | CCDS31069.2     | Intronic | -      | -        | - | - | A | T |
| PD7518a | Substitution | 1  | 246095378 | 246095378 | SMYD3      | CCDS31083.1     | Intronic | -      | -        | - | - | G | A |
| PD7518a | Substitution | 1  | 247990408 | 247990408 | -          | -               | -        | -      | -        | - | - | G | C |
| PD7518a | Substitution | 2  | 2636847   | 2636847   | -          | -               | -        | -      | -        | - | - | A | T |
| PD7518a | Substitution | 2  | 3113392   | 3113392   | -          | -               | -        | -      | -        | - | - | G | A |
| PD7518a | Substitution | 2  | 3125339   | 3125339   | -          | -               | -        | -      | -        | - | - | G | A |
| PD7518a | Substitution | 2  | 15394742  | 15394742  | NBAS       | CCDS1685.1      | Intronic | -      | -        | - | - | T | C |
| PD7518a | Substitution | 2  | 16919579  | 16919579  | -          | -               | -        | -      | -        | - | - | A | T |
| PD7518a | Substitution | 2  | 19403690  | 19403690  | -          | -               | -        | -      | -        | - | - | C | T |
| PD7518a | Substitution | 2  | 23129588  | 23129588  | -          | -               | -        | -      | -        | - | - | C | T |
| PD7518a | Substitution | 2  | 24515088  | 24515088  | ITSN2      | CCDS1710.2      | Intronic | -      | -        | - | - | G | A |
| PD7518a | Substitution | 2  | 36615446  | 36615446  | CRIM1      | CCDS1783.1      | Intronic | -      | -        | - | - | A | T |
| PD7518a | Substitution | 2  | 41728790  | 41728790  | -          | -               | -        | -      | -        | - | - | A | T |
| PD7518a | Substitution | 2  | 51611986  | 51611986  | -          | -               | -        | -      | -        | - | - | C | A |
| PD7518a | Substitution | 2  | 54373842  | 54373842  | ACYP2      | CCDS1850.1      | Intronic | -      | -        | - | - | G | A |
| PD7518a | Indel        | 2  | 56181722  | 56181722  | -          | -               | -        | -      | -        | - | - | - | - |
| PD7518a | Substitution | 2  | 73226833  | 73226833  | SFXN5      | CCDS1922.1      | Intronic | -      | -        | - | - | A | G |
| PD7518a | Substitution | 2  | 73246789  | 73246789  | SFXN5      | CCDS1922.1      | Intronic | -      | -        | - | - | C | T |
| PD7518a | Substitution | 2  | 76627412  | 76627412  | -          | -               | -        | -      | -        | - | - | T | A |
| PD7518a | Substitution | 2  | 76627413  | 76627413  | -          | -               | -        | -      | -        | - | - | T | A |
| PD7518a | Substitution | 2  | 78584122  | 78584122  | -          | -               | -        | -      | -        | - | - | C | T |
| PD7518a | Substitution | 2  | 78806728  | 78806728  | -          | -               | -        | -      | -        | - | - | C | A |
| PD7518a | Substitution | 2  | 79266941  | 79266941  | -          | -               | -        | -      | -        | - | - | C | G |
| PD7518a | Substitution | 2  | 83086378  | 83086378  | -          | -               | -        | -      | -        | - | - | G | T |
| PD7518a | Substitution | 2  | 85667088  | 85667088  | -          | -               | -        | -      | -        | - | - | C | T |
| PD7518a | Substitution | 2  | 102809717 | 102809717 | IL1RL2     | CCDS2056.1      | Intronic | -      | -        | - | - | T | G |
| PD7518a | Substitution | 2  | 113232076 | 113232076 | -          | -               | -        | -      | -        | - | - | G | T |
| PD7518a | Substitution | 2  | 116859962 | 116859962 | -          | -               | -        | -      | -        | - | - | C | A |
| PD7518a | Substitution | 2  | 117443968 | 117443968 | -          | -               | -        | -      | -        | - | - | T | A |
| PD7518a | Substitution | 2  | 118203193 | 118203193 | -          | -               | -        | -      | -        | - | - | A | G |
| PD7518a | Substitution | 2  | 123290967 | 123290967 | -          | -               | -        | -      | -        | - | - | A | T |
| PD7518a | Substitution | 2  | 126501731 | 126501731 | -          | -               | -        | -      | -        | - | - | G | T |
| PD7518a | Substitution | 2  | 129773187 | 129773187 | -          | -               | -        | -      | -        | - | - | C | A |
| PD7518a | Substitution | 2  | 133302125 | 133302125 | GPR39      | CCDS2170.1      | Intronic | -      | -        | - | - | C | T |
| PD7518a | Substitution | 2  | 141466602 | 141466602 | LRP1B      | CCDS2182.1      | Intronic | -      | -        | - | - | G | T |
| PD7518a | Substitution | 2  | 141539094 | 141539094 | LRP1B      | CCDS2182.1      | Intronic | -      | -        | - | - | G | A |
| PD7518a | Substitution | 2  | 143724220 | 143724220 | KYNU       | CCDS2183.1      | Intronic | -      | -        | - | - | T | C |
| PD7518a | Substitution | 2  | 144102969 | 144102969 | ARHGAP15   | CCDS2184.1      | Intronic | -      | -        | - | - | C | A |
| PD7518a | Substitution | 2  | 144315256 | 144315256 | ARHGAP15   | CCDS2184.1      | Intronic | -      | -        | - | - | G | T |
| PD7518a | Substitution | 2  | 147555440 | 147555440 | -          | -               | -        | -      | -        | - | - | C | A |
| PD7518a | Substitution | 2  | 153377032 | 153377032 | FMNL2      | CCDS46429.1     | Intronic | -      | -        | - | - | C | A |
| PD7518a | Substitution | 2  | 154565257 | 154565257 | -          | -               | -        | -      | -        | - | - | T | G |
| PD7518a | Substitution | 2  | 155336026 | 155336026 | -          | -               | -        | -      | -        | - | - | T | A |
| PD7518a | Substitution | 2  | 155589187 | 155589187 | KCNJ3      | CCDS2200.1      | Intronic | -      | -        | - | - | C | T |
| PD7518a | Substitution | 2  | 156007974 | 156007974 | -          | -               | -        | -      | -        | - | - | T | C |
| PD7518a | Substitution | 2  | 167919241 | 167919241 | XIRP2      | CCDS42769.1     | Intronic | -      | -        | - | - | G | A |





|         |              |   |           |           |                 |                 |          |         |        |   |   |   |
|---------|--------------|---|-----------|-----------|-----------------|-----------------|----------|---------|--------|---|---|---|
| PD7518a | Substitution | 7 | 17568985  | 17568985  | -               | -               | -        | -       | -      | - | C | T |
| PD7518a | Substitution | 7 | 18446458  | 18446458  | HDAC9           | ENST00000433709 | Intronic | -       | -      | - | G | G |
| PD7518a | Substitution | 7 | 22129249  | 22129249  | -               | -               | -        | -       | -      | - | A | T |
| PD7518a | Substitution | 7 | 23239402  | 23239402  | NUPL2           | CCDS5379.1      | Intronic | -       | -      | - | G | T |
| PD7518a | Substitution | 7 | 23614785  | 23614785  | -               | -               | -        | -       | -      | - | A | C |
| PD7518a | Substitution | 7 | 26120939  | 26120939  | -               | -               | -        | -       | -      | - | G | A |
| PD7518a | Substitution | 7 | 30434991  | 30434991  | AC006978.1      | ENST00000507825 | Intronic | -       | -      | - | G | T |
| PD7518a | Substitution | 7 | 30599128  | 30599128  | AC006978.1      | ENST00000507825 | Intronic | -       | -      | - | C | T |
| PD7518a | Substitution | 7 | 32152003  | 32152003  | PDE1C           | ENST00000396193 | Intronic | -       | -      | - | G | T |
| PD7518a | Substitution | 7 | 34692113  | 34692113  | ENSG00000214841 | ENST00000399077 | Intronic | -       | -      | - | G | A |
| PD7518a | Substitution | 7 | 39866903  | 39866903  | -               | -               | -        | -       | -      | - | A | C |
| PD7518a | Substitution | 7 | 44697555  | 44697555  | OGDH            | CCDS34627.1     | Intronic | -       | -      | - | G | A |
| PD7518a | Substitution | 7 | 54042815  | 54042815  | -               | -               | -        | -       | -      | - | C | A |
| PD7518a | Substitution | 7 | 54511601  | 54511601  | -               | -               | -        | -       | -      | - | G | A |
| PD7518a | Substitution | 7 | 54621001  | 54621001  | VSTM2A          | CCDS5512.2      | Intronic | -       | -      | - | C | G |
| PD7518a | Substitution | 7 | 63247590  | 63247590  | -               | -               | -        | -       | -      | - | A | T |
| PD7518a | Substitution | 7 | 64796703  | 64796703  | -               | -               | -        | -       | -      | - | G | A |
| PD7518a | Substitution | 7 | 65909800  | 65909800  | AC008267.2      | ENST00000418858 | Intronic | -       | -      | - | T | G |
| PD7518a | Substitution | 7 | 67455175  | 67455175  | -               | -               | -        | -       | -      | - | T | C |
| PD7518a | Substitution | 7 | 81238309  | 81238309  | -               | -               | -        | -       | -      | - | C | T |
| PD7518a | Substitution | 7 | 84929097  | 84929097  | -               | -               | -        | -       | -      | - | A | G |
| PD7518a | Substitution | 7 | 85774577  | 85774577  | -               | -               | -        | -       | -      | - | C | T |
| PD7518a | Indel        | 7 | 86425546  | 86425546  | -               | -               | -        | -       | -      | - | - | - |
| PD7518a | Substitution | 7 | 88759210  | 88759210  | ZNF804B         | CCDS5613.1      | Intronic | -       | -      | - | T | C |
| PD7518a | Substitution | 7 | 88978284  | 88978284  | -               | -               | -        | -       | -      | - | G | A |
| PD7518a | Substitution | 7 | 89192104  | 89192104  | -               | -               | -        | -       | -      | - | T | G |
| PD7518a | Substitution | 7 | 106309875 | 106309875 | -               | -               | -        | -       | -      | - | T | C |
| PD7518a | Substitution | 7 | 106350236 | 106350236 | -               | -               | -        | -       | -      | - | C | G |
| PD7518a | Indel        | 7 | 119292095 | 119292095 | -               | -               | -        | -       | -      | - | - | - |
| PD7518a | Substitution | 7 | 119923938 | 119923938 | KCND2           | CCDS5776.1      | Intronic | -       | -      | - | C | T |
| PD7518a | Substitution | 7 | 132305893 | 132305893 | PLXNA4          | CCDS43646.1     | Intronic | -       | -      | - | C | T |
| PD7518a | Substitution | 7 | 132958503 | 132958503 | EXOC4           | CCDS5829.1      | Intronic | -       | -      | - | T | A |
| PD7518a | Substitution | 7 | 133542809 | 133542809 | EXOC4           | CCDS5829.1      | Intronic | -       | -      | - | C | A |
| PD7518a | Substitution | 7 | 139735187 | 139735187 | PARP12          | CCDS5857.1      | Intronic | -       | -      | - | A | C |
| PD7518a | Substitution | 7 | 142686178 | 142686178 | -               | -               | -        | -       | -      | - | C | T |
| PD7518a | Substitution | 7 | 145980462 | 145980462 | CNTNAP2         | CCDS5889.1      | Intronic | -       | -      | - | G | A |
| PD7518a | Substitution | 7 | 146775288 | 146775288 | CNTNAP2         | CCDS5889.1      | Intronic | -       | -      | - | T | G |
| PD7518a | Indel        | 7 | 153981506 | 153981506 | -               | -               | -        | -       | -      | - | - | - |
| PD7518a | Substitution | 8 | 1613178   | 1613178   | DLGAP2          | CCDS47760.1     | Intronic | -       | -      | - | T | A |
| PD7518a | Substitution | 8 | 5256010   | 5256010   | -               | -               | -        | -       | -      | - | C | A |
| PD7518a | Substitution | 8 | 5841860   | 5841860   | -               | -               | -        | -       | -      | - | C | T |
| PD7518a | Substitution | 8 | 6788232   | 6788232   | -               | -               | -        | -       | -      | - | G | A |
| PD7518a | Substitution | 8 | 8828675   | 8828675   | -               | -               | -        | -       | -      | - | C | T |
| PD7518a | Substitution | 8 | 11562660  | 11562660  | GATA4           | CCDS5983.1      | Intronic | -       | -      | - | G | T |
| PD7518a | Substitution | 8 | 15660796  | 15660796  | -               | -               | -        | -       | -      | - | T | A |
| PD7518a | Substitution | 8 | 15797443  | 15797443  | -               | -               | -        | -       | -      | - | A | T |
| PD7518a | Substitution | 8 | 16587661  | 16587661  | -               | -               | -        | -       | -      | - | G | A |
| PD7518a | Substitution | 8 | 19110739  | 19110739  | -               | -               | -        | -       | -      | - | C | A |
| PD7518a | Substitution | 8 | 21219489  | 21219489  | -               | -               | -        | -       | -      | - | G | A |
| PD7518a | Substitution | 8 | 28578003  | 28578003  | EXTL3           | CCDS6070.1      | Intronic | -       | -      | - | G | T |
| PD7518a | Substitution | 8 | 31531994  | 31531994  | NRG1            | CCDS47836.1     | -        | -       | -      | - | T | A |
| PD7518a | Substitution | 8 | 42716894  | 42716894  | RNF170          | CCDS6138.1      | c.501C>T | p.P167P | Silent | - | G | A |
| PD7518a | Substitution | 8 | 52434397  | 52434397  | PXNDL           | CCDS47855.1     | Intronic | -       | -      | - | C | T |
| PD7518a | Substitution | 8 | 5526257   | 5526257   | RP1             | ENST00000427058 | Intronic | -       | -      | - | G | A |
| PD7518a | Substitution | 8 | 56408667  | 56408667  | KKR4            | CCDS34893.1     | Intronic | -       | -      | - | G | T |
| PD7518a | Substitution | 8 | 57775660  | 57775660  | -               | -               | -        | -       | -      | - | T | G |
| PD7518a | Substitution | 8 | 60228565  | 60228565  | -               | -               | -        | -       | -      | - | T | G |
| PD7518a | Substitution | 8 | 60626440  | 60626440  | -               | -               | -        | -       | -      | - | C | T |
| PD7518a | Substitution | 8 | 63376597  | 63376597  | -               | -               | -        | -       | -      | - | C | T |
| PD7518a | Substitution | 8 | 64649937  | 64649937  | -               | -               | -        | -       | -      | - | G | A |
| PD7518a | Substitution | 8 | 66453721  | 66453721  | -               | -               | -        | -       | -      | - | C | A |
| PD7518a | Substitution | 8 | 67683440  | 67683440  | SGK3            | CCDS6195.1      | Intronic | -       | -      | - | T | C |
| PD7518a | Substitution | 8 | 69386262  | 69386262  | C8orf34         | CCDS6203.1      | Intronic | -       | -      | - | C | T |
| PD7518a | Substitution | 8 | 73579956  | 73579956  | KCNB2           | CCDS6209.1      | Intronic | -       | -      | - | T | C |
| PD7518a | Substitution | 8 | 73579958  | 73579958  | KCNB2           | CCDS6209.1      | Intronic | -       | -      | - | C | A |
| PD7518a | Substitution | 8 | 77444507  | 77444507  | -               | -               | -        | -       | -      | - | T | G |
| PD7518a | Substitution | 8 | 80080529  | 80080529  | -               | -               | -        | -       | -      | - | G | A |
| PD7518a | Substitution | 8 | 80452596  | 80452596  | -               | -               | -        | -       | -      | - | G | C |
| PD7518a | Substitution | 8 | 80490754  | 80490754  | -               | -               | -        | -       | -      | - | C | T |
| PD7518a | Substitution | 8 | 80512170  | 80512170  | -               | -               | -        | -       | -      | - | C | T |
| PD7518a | Substitution | 8 | 84239226  | 84239226  | -               | -               | -        | -       | -      | - | A | T |
| PD7518a | Substitution | 8 | 84239227  | 84239227  | -               | -               | -        | -       | -      | - | G | T |
| PD7518a | Substitution | 8 | 84854571  | 84854571  | -               | -               | -        | -       | -      | - | A | C |
| PD7518a | Substitution | 8 | 85310996  | 85310996  | -               | -               | -        | -       | -      | - | G | T |
| PD7518a | Substitution | 8 | 89831076  | 89831076  | -               | -               | -        | -       | -      | - | C | T |
| PD7518a | Substitution | 8 | 92481031  | 92481031  | -               | -               | -        | -       | -      | - | G | A |
| PD7518a | Substitution | 8 | 92504210  | 92504210  | -               | -               | -        | -       | -      | - | C | G |
| PD7518a | Substitution | 8 | 97547405  | 97547405  | SDC2            | CCDS6272.1      | Intronic | -       | -      | - | T | G |
| PD7518a | Substitution | 8 | 106566593 | 106566593 | ZPPM2           | CCDS47908.1     | Intronic | -       | -      | - | T | A |
| PD7518a | Substitution | 8 | 107302014 | 107302014 | OXR1            | CCDS47909.1     | Intronic | -       | -      | - | A | T |
| PD7518a | Substitution | 8 | 111247850 | 111247850 | -               | -               | -        | -       | -      | - | T | A |
| PD7518a | Substitution | 8 | 113573251 | 113573251 | CSMD3           | CCDS6315.1      | Intronic | -       | -      | - | T | A |
| PD7518a | Substitution | 8 | 114560446 | 114560446 | -               | -               | -        | -       | -      | - | T | C |
| PD7518a | Substitution | 8 | 114692476 | 114692476 | -               | -               | -        | -       | -      | - | C | A |
| PD7518a | Substitution | 8 | 118504558 | 118504558 | -               | -               | -        | -       | -      | - | C | T |
| PD7518a | Substitution | 8 | 123780170 | 123780170 | -               | -               | -        | -       | -      | - | C | T |
| PD7518a | Substitution | 8 | 124751943 | 124751943 | -               | -               | -        | -       | -      | - | C | T |
| PD7518a | Substitution | 8 | 125586245 | 125586245 | MTSS1           | CCDS6353.1      | Intronic | -       | -      | - | T | G |
| PD7518a | Substitution | 8 | 130701173 | 130701173 | -               | -               | -        | -       | -      | - | T | A |
| PD7518a | Substitution | 8 | 131967172 | 131967172 | ADCY8           | CCDS6363.1      | Intronic | -       | -      | - | A | G |
| PD7518a | Substitution | 8 | 132219045 | 132219045 | -               | -               | -        | -       | -      | - | C | G |
| PD7518a | Substitution | 8 | 132950465 | 132950465 | EFR3A           | CCDS34942.2     | Intronic | -       | -      | - | A | T |
| PD7518a | Substitution | 8 | 135001143 | 135001143 | -               | -               | -        | -       | -      | - | C | A |
| PD7518a | Substitution | 8 | 135497383 | 135497383 | ZFAT            | CCDS47924.1     | Intronic | -       | -      | - | A | C |
| PD7518a | Substitution | 8 | 136246232 | 136246232 | -               | -               | -        | -       | -      | - | G | T |
| PD7518a | Substitution | 8 | 137912595 | 137912595 | -               | -               | -        | -       | -      | - | C | G |
| PD7518a | Substitution | 9 | 8874663   | 8874663   | PTPRD           | CCDS43786.1     | Intronic | -       | -      | - | C | T |
| PD7518a | Substitution | 9 | 10329668  | 10329668  | PTPRD           | CCDS43786.1     | Intronic | -       | -      | - | G | T |
| PD7518a | Substitution | 9 | 10802072  | 10802072  | -               | -               | -        | -       | -      | - | A | T |
| PD7518a | Substitution | 9 | 14967699  | 14967699  | -               | -               | -        | -       | -      | - | G | A |
| PD7518a | Substitution | 9 | 21585123  | 21585123  | -               | -               | -        | -       | -      | - | A | G |
| PD7518a | Substitution | 9 | 23117155  | 23117155  | -               | -               | -        | -       | -      | - | A | C |
| PD7518a | Indel        | 9 | 24274329  | 24274329  | -               | -               | -        | -       | -      | - | - | - |
| PD7518a | Substitution | 9 | 28595892  | 28595892  | LINGO2          | CCDS6524.1      | Intronic | -       | -      | - | T | A |
| PD7518a | Substitution | 9 | 36505399  | 36505399  | -               | -               | -        | -       | -      | - | C | A |
| PD7518a | Substitution | 9 | 38640900  | 38640900  | -               | -               | -        | -       | -      | - | G | A |
| PD7518a | Substitution | 9 | 66257084  | 66257084  | -               | -               | -        | -       | -      | - | A | T |
| PD7518a | Substitution | 9 | 81008339  | 81008339  | -               | -               | -        | -       | -      | - | G | A |
| PD7518a | Substitution | 9 | 84315345  | 84315345  | -               | -               | -        | -       | -      | - | G | A |
| PD7518a | Substitution | 9 | 87769910  | 87769910  | -               | -               | -        | -       | -      | - | G | A |
| PD7518a | Substitution | 9 | 101707408 | 101707408 | COL15A1         | CCDS35081.1     | Intronic | -       | -      | - | T | C |

|         |              |    |           |           |                 |                 |            |           |            |   |   |
|---------|--------------|----|-----------|-----------|-----------------|-----------------|------------|-----------|------------|---|---|
| PD7518a | Substitution | 9  | 104019053 | 104019053 | ENSG00000148123 | CCDS6751.1      | Intronic   | -         | -          | G | A |
| PD7518a | Substitution | 9  | 104096874 | 104096874 | -               | -               | -          | -         | -          | G | A |
| PD7518a | Substitution | 9  | 104640077 | 104640077 | -               | -               | -          | -         | -          | G | T |
| PD7518a | Substitution | 9  | 108587973 | 108587973 | -               | -               | -          | -         | -          | A | G |
| PD7518a | Substitution | 9  | 112923479 | 112923479 | PALM2-AKAP2     | CCDS35100.1     | Intronic   | -         | -          | A | G |
| PD7518a | Substitution | 9  | 120471430 | 120471430 | TLR4            | CCDS6818.1      | Intronic   | -         | -          | T | A |
| PD7518a | Substitution | 9  | 128478338 | 128478338 | -               | -               | -          | -         | -          | A | T |
| PD7518a | Substitution | 10 | 1862759   | 1862759   | -               | -               | -          | -         | -          | T | C |
| PD7518a | Substitution | 10 | 27575905  | 27575905  | -               | -               | -          | -         | -          | A | T |
| PD7518a | Substitution | 10 | 43224470  | 43224470  | ENSG00000230425 | ENST00000453416 | Intronic   | -         | -          | G | A |
| PD7518a | Substitution | 10 | 43278845  | 43278845  | BMS1            | CCDS7199.1      | Intronic   | -         | -          | T | G |
| PD7518a | Substitution | 10 | 47372679  | 47372679  | -               | -               | -          | -         | -          | C | T |
| PD7518a | Substitution | 10 | 49989405  | 49989405  | WDFY4           | CCDS44385.1     | Intronic   | -         | -          | G | A |
| PD7518a | Substitution | 10 | 53634911  | 53634911  | PRKG1           | CCDS7244.1      | Intronic   | -         | -          | A | G |
| PD7518a | Substitution | 10 | 56618489  | 56618489  | PCDH15          | ENST00000373957 | Intronic   | -         | -          | T | A |
| PD7518a | Substitution | 10 | 56809327  | 56809327  | PCDH15          | ENST00000373957 | Intronic   | -         | -          | T | A |
| PD7518a | Substitution | 10 | 57800651  | 57800651  | -               | -               | -          | -         | -          | G | A |
| PD7518a | Substitution | 10 | 59280027  | 59280027  | -               | -               | -          | -         | -          | A | T |
| PD7518a | Indel        | 10 | 64455111  | 64455111  | -               | -               | -          | -         | -          | - | - |
| PD7518a | Substitution | 10 | 71366553  | 71366553  | -               | -               | -          | -         | -          | G | A |
| PD7518a | Indel        | 10 | 79070390  | 79070390  | -               | -               | -          | -         | -          | - | - |
| PD7518a | Substitution | 10 | 83410439  | 83410439  | -               | -               | -          | -         | -          | T | G |
| PD7518a | Substitution | 10 | 85314027  | 85314027  | -               | -               | -          | -         | -          | T | A |
| PD7518a | Substitution | 10 | 87073213  | 87073213  | -               | -               | -          | -         | -          | A | T |
| PD7518a | Substitution | 10 | 87602998  | 87602998  | GRID1           | CCDS31236.1     | Intronic   | -         | -          | A | G |
| PD7518a | Substitution | 10 | 96916454  | 96916454  | -               | -               | -          | -         | -          | C | G |
| PD7518a | Substitution | 10 | 108486559 | 108486559 | SORCS1          | CCDS7559.1      | Intronic   | -         | -          | T | G |
| PD7518a | Substitution | 10 | 120752940 | 120752940 | -               | -               | -          | -         | -          | C | T |
| PD7518a | Substitution | 10 | 122966810 | 122966810 | -               | -               | -          | -         | -          | A | C |
| PD7518a | Substitution | 11 | 558294    | 558294    | C11orf35        | CCDS7701.1      | Intronic   | -         | -          | G | T |
| PD7518a | Substitution | 11 | 5952039   | 5952039   | TRIM5           | ENST00000412903 | Intronic   | -         | -          | C | T |
| PD7518a | Substitution | 11 | 13556866  | 13556866  | -               | -               | -          | -         | -          | G | A |
| PD7518a | Substitution | 11 | 15827988  | 15827988  | -               | -               | -          | -         | -          | A | G |
| PD7518a | Substitution | 11 | 16437222  | 16437222  | SOX6            | CCDS7821.1      | Intronic   | -         | -          | A | T |
| PD7518a | Substitution | 11 | 23887913  | 23887913  | -               | -               | -          | -         | -          | A | G |
| PD7518a | Substitution | 11 | 24497601  | 24497601  | -               | -               | -          | -         | -          | C | T |
| PD7518a | Substitution | 11 | 28617392  | 28617392  | -               | -               | -          | -         | -          | C | T |
| PD7518a | Substitution | 11 | 36245189  | 36245189  | LDLRAD3         | CCDS31462.1     | Intronic   | -         | -          | G | C |
| PD7518a | Substitution | 11 | 39755010  | 39755010  | -               | -               | -          | -         | -          | C | A |
| PD7518a | Substitution | 11 | 40619450  | 40619450  | -               | -               | -          | -         | -          | G | A |
| PD7518a | Substitution | 11 | 57137781  | 57137781  | -               | -               | -          | -         | -          | C | T |
| PD7518a | Substitution | 11 | 58304926  | 58304926  | LPXN            | CCDS7969.1      | Intronic   | -         | -          | T | C |
| PD7518a | Substitution | 11 | 59394708  | 59394708  | -               | -               | -          | -         | -          | T | A |
| PD7518a | Substitution | 11 | 62369180  | 62369180  | MTA2            | CCDS8022.1      | Non-coding | r.124c>u  | 5prime UTR | G | A |
| PD7518a | Substitution | 11 | 68732339  | 68732339  | -               | -               | -          | -         | -          | G | A |
| PD7518a | Substitution | 11 | 69373464  | 69373464  | -               | -               | -          | -         | -          | G | T |
| PD7518a | Substitution | 11 | 69446778  | 69446778  | -               | -               | -          | -         | -          | G | T |
| PD7518a | Substitution | 11 | 71964352  | 71964352  | -               | -               | -          | -         | -          | C | T |
| PD7518a | Substitution | 11 | 78840211  | 78840211  | ODZ4            | CCDS44688.1     | Intronic   | -         | -          | G | A |
| PD7518a | Substitution | 11 | 82101986  | 82101986  | AP002802.1      | ENST00000500502 | Intronic   | -         | -          | C | A |
| PD7518a | Substitution | 11 | 85938636  | 85938636  | -               | -               | -          | -         | -          | C | T |
| PD7518a | Substitution | 11 | 86266351  | 86266351  | ME3             | CCDS8277.1      | Intronic   | -         | -          | G | C |
| PD7518a | Substitution | 11 | 88611643  | 88611643  | GRM5            | CCDS44694.1     | Intronic   | -         | -          | C | A |
| PD7518a | Substitution | 11 | 88645292  | 88645292  | GRM5            | CCDS44694.1     | Intronic   | -         | -          | G | A |
| PD7518a | Substitution | 11 | 88645293  | 88645293  | GRM5            | CCDS44694.1     | Intronic   | -         | -          | A | T |
| PD7518a | Substitution | 11 | 91506468  | 91506468  | -               | -               | -          | -         | -          | G | A |
| PD7518a | Substitution | 11 | 95580307  | 95580307  | MTMR2           | CCDS8305.1      | Intronic   | -         | -          | C | T |
| PD7518a | Indel        | 11 | 99787612  | 99787612  | -               | -               | -          | -         | -          | C | T |
| PD7518a | Substitution | 11 | 100104730 | 100104730 | CNTN5           | ENST00000279463 | Intronic   | -         | -          | C | T |
| PD7518a | Substitution | 11 | 101422772 | 101422772 | TRPC6           | CCDS8311.1      | Intronic   | -         | -          | T | C |
| PD7518a | Substitution | 11 | 102637617 | 102637617 | -               | -               | -          | -         | -          | A | T |
| PD7518a | Substitution | 11 | 105718382 | 105718382 | GRIA4           | CCDS41706.1     | Intronic   | -         | -          | G | T |
| PD7518a | Substitution | 11 | 111386590 | 111386590 | C11orf88        | CCDS41712.1     | Intronic   | -         | -          | C | G |
| PD7518a | Substitution | 11 | 116335101 | 116335101 | -               | -               | -          | -         | -          | C | T |
| PD7518a | Substitution | 11 | 118142597 | 118142597 | -               | -               | -          | -         | -          | G | A |
| PD7518a | Substitution | 11 | 127115255 | 127115255 | -               | -               | -          | -         | -          | T | A |
| PD7518a | Substitution | 11 | 127602825 | 127602825 | -               | -               | -          | -         | -          | T | C |
| PD7518a | Substitution | 11 | 128746717 | 128746717 | -               | -               | -          | -         | -          | C | A |
| PD7518a | Substitution | 11 | 128784691 | 128784691 | KCNJ5           | CCDS8479.1      | Intronic   | -         | -          | C | T |
| PD7518a | Substitution | 12 | 6340277   | 6340277   | CD9             | CCDS8540.1      | Intronic   | -         | -          | C | T |
| PD7518a | Substitution | 12 | 17802752  | 17802752  | -               | -               | -          | -         | -          | G | A |
| PD7518a | Substitution | 12 | 17968515  | 17968515  | -               | -               | -          | -         | -          | G | T |
| PD7518a | Substitution | 12 | 22064283  | 22064283  | ABCC9           | CCDS8693.1      | Intronic   | -         | -          | C | A |
| PD7518a | Substitution | 12 | 22981303  | 22981303  | -               | -               | -          | -         | -          | A | C |
| PD7518a | Substitution | 12 | 24015875  | 24015875  | SOX5            | CCDS8699.1      | Intronic   | -         | -          | T | C |
| PD7518a | Indel        | 12 | 33193255  | 33193255  | -               | -               | -          | -         | -          | - | - |
| PD7518a | Substitution | 12 | 38866930  | 38866930  | -               | -               | -          | -         | -          | C | G |
| PD7518a | Substitution | 12 | 43405652  | 43405652  | -               | -               | -          | -         | -          | A | G |
| PD7518a | Substitution | 12 | 58930149  | 58930149  | -               | -               | -          | -         | -          | C | A |
| PD7518a | Substitution | 12 | 62417702  | 62417702  | -               | -               | -          | -         | -          | T | C |
| PD7518a | Substitution | 12 | 65922939  | 65922939  | -               | -               | -          | -         | -          | T | A |
| PD7518a | Substitution | 12 | 65922941  | 65922941  | -               | -               | -          | -         | -          | A | C |
| PD7518a | Substitution | 12 | 68532496  | 68532496  | -               | -               | -          | -         | -          | A | C |
| PD7518a | Substitution | 12 | 68836520  | 68836520  | -               | -               | -          | -         | -          | G | T |
| PD7518a | Substitution | 12 | 78239296  | 78239296  | NAV3            | CCDS41815.1     | Intronic   | -         | -          | C | T |
| PD7518a | Substitution | 12 | 87313150  | 87313150  | -               | -               | -          | -         | -          | A | C |
| PD7518a | Substitution | 12 | 88260595  | 88260595  | -               | -               | -          | -         | -          | G | A |
| PD7518a | Substitution | 12 | 92561711  | 92561711  | AC025164.1      | ENST00000499685 | Intronic   | -         | -          | T | G |
| PD7518a | Substitution | 12 | 96811927  | 96811927  | -               | -               | -          | -         | -          | G | T |
| PD7518a | Substitution | 12 | 111716203 | 111716203 | CUX2            | CCDS41837.1     | Intronic   | -         | -          | C | T |
| PD7518a | Substitution | 12 | 115256535 | 115256535 | -               | -               | -          | -         | -          | G | A |
| PD7518a | Substitution | 12 | 121440129 | 121440129 | HNF1A           | CCDS9209.1      | Non-coding | r.3256c>a | 3prime UTR | C | A |
| PD7518a | Substitution | 12 | 124302890 | 124302890 | DNAH10          | CCDS9255.2      | Intronic   | -         | -          | A | T |
| PD7518a | Substitution | 12 | 127562229 | 127562229 | -               | -               | -          | -         | -          | C | A |
| PD7518a | Substitution | 12 | 129744171 | 129744171 | TMEM132D        | CCDS9266.1      | Intronic   | -         | -          | G | A |
| PD7518a | Substitution | 13 | 31616010  | 31616010  | -               | -               | -          | -         | -          | C | A |
| PD7518a | Substitution | 13 | 35372539  | 35372539  | -               | -               | -          | -         | -          | T | C |
| PD7518a | Substitution | 13 | 36143435  | 36143435  | NBEA            | CCDS45026.1     | Intronic   | -         | -          | T | C |
| PD7518a | Substitution | 13 | 37800686  | 37800686  | -               | -               | -          | -         | -          | A | G |
| PD7518a | Substitution | 13 | 46420306  | 46420306  | SLAH3           | CCDS41883.1     | Intronic   | -         | -          | C | T |
| PD7518a | Substitution | 13 | 51600699  | 51600699  | GUCY1B2         | ENST00000389600 | Intronic   | -         | -          | C | A |
| PD7518a | Indel        | 13 | 62042220  | 62042222  | -               | -               | -          | -         | -          | - | - |
| PD7518a | Substitution | 13 | 67848124  | 67848124  | -               | -               | -          | -         | -          | G | A |
| PD7518a | Substitution | 13 | 68644081  | 68644081  | -               | -               | -          | -         | -          | G | T |
| PD7518a | Substitution | 13 | 70824908  | 70824908  | -               | -               | -          | -         | -          | G | T |
| PD7518a | Indel        | 13 | 75919854  | 75919854  | -               | -               | -          | -         | -          | - | - |
| PD7518a | Indel        | 13 | 77282714  | 77282715  | -               | -               | -          | -         | -          | - | - |
| PD7518a | Substitution | 13 | 81820452  | 81820452  | -               | -               | -          | -         | -          | G | T |
| PD7518a | Substitution | 13 | 82298934  | 82298934  | -               | -               | -          | -         | -          | C | T |
| PD7518a | Substitution | 13 | 82960012  | 82960012  | -               | -               | -          | -         | -          | T | A |
| PD7518a | Substitution | 13 | 84603994  | 84603994  | -               | -               | -          | -         | -          | C | A |





|         |              |    |           |           |                 |                  |           |         |                  |   |   |   |
|---------|--------------|----|-----------|-----------|-----------------|------------------|-----------|---------|------------------|---|---|---|
| PD7518a | Substitution | 21 | 42178470  | 42178470  | DSCAM           | CCDS42929.1      | Intronic  | -       | -                | - | C | T |
| PD7518a | Substitution | 21 | 46117833  | 46117833  | KRTAP10-12      | CCDS42967.1      | c.717A>T  | p.T239T | Silent           | - | A | T |
| PD7518a | Substitution | 21 | 46771074  | 46771074  | -               | -                | -         | -       | -                | - | C | T |
| PD7518a | Substitution | 22 | 17809977  | 17809977  | -               | -                | -         | -       | -                | - | A | G |
| PD7518a | Substitution | 22 | 34479208  | 34479208  | -               | -                | -         | -       | -                | - | G | A |
| PD7518a | Substitution | 22 | 41480741  | 41480741  | -               | -                | -         | -       | -                | - | A | G |
| PD7518a | Substitution | X  | 5152742   | 5152742   | -               | -                | -         | -       | -                | - | C | T |
| PD7518a | Substitution | X  | 27057909  | 27057909  | -               | -                | -         | -       | -                | - | G | A |
| PD7518a | Substitution | X  | 32323194  | 32323194  | DMD             | CCDS14233.1      | Intronic  | -       | -                | - | C | T |
| PD7518a | Substitution | X  | 56038345  | 56038345  | -               | -                | -         | -       | -                | - | G | T |
| PD7518a | Substitution | X  | 66433317  | 66433317  | -               | -                | -         | -       | -                | - | C | T |
| PD7518a | Substitution | X  | 81375578  | 81375578  | -               | -                | -         | -       | -                | - | G | T |
| PD7518a | Substitution | X  | 86416174  | 86416174  | -               | -                | -         | -       | -                | - | C | T |
| PD7518a | Substitution | X  | 90870992  | 90870992  | -               | -                | -         | -       | -                | - | G | T |
| PD7518a | Substitution | X  | 96190222  | 96190222  | DIAPH2          | CCDS14467.1      | Intronic  | -       | -                | - | C | T |
| PD7518a | Substitution | X  | 97919050  | 97919050  | -               | -                | -         | -       | -                | - | C | T |
| PD7518a | Substitution | X  | 99534783  | 99534783  | -               | -                | -         | -       | -                | - | G | T |
| PD7518a | Substitution | X  | 102420684 | 102420684 | ENSG00000226623 | ENST000000416953 | Intronic  | -       | -                | - | C | G |
| PD7518a | Substitution | X  | 105166263 | 105166263 | -               | -                | -         | -       | -                | - | G | A |
| PD7518a | Substitution | X  | 116326051 | 116326051 | -               | -                | -         | -       | -                | - | C | A |
| PD7518a | Substitution | X  | 116725869 | 116725869 | -               | -                | -         | -       | -                | - | C | A |
| PD7518a | Substitution | X  | 120504471 | 120504471 | -               | -                | -         | -       | -                | - | T | G |
| PD7518a | Substitution | X  | 125155759 | 125155759 | -               | -                | -         | -       | -                | - | T | C |
| PD7518a | Substitution | X  | 126370654 | 126370654 | -               | -                | -         | -       | -                | - | G | T |
| PD7518a | Substitution | X  | 127317358 | 127317358 | -               | -                | -         | -       | -                | - | A | G |
| PD7518a | Substitution | X  | 133353503 | 133353503 | -               | -                | -         | -       | -                | - | G | T |
| PD7518a | Substitution | X  | 138238584 | 138238584 | FGF13           | ENST00000436198  | Intronic  | -       | -                | - | C | T |
| PD7518a | Substitution | X  | 145078987 | 145078987 | -               | -                | -         | -       | -                | - | T | A |
| PD7518a | Substitution | Y  | 9515319   | 9515319   | -               | -                | -         | -       | -                | - | G | A |
| PD7518a | Substitution | Y  | 13426248  | 13426248  | -               | -                | -         | -       | -                | - | G | A |
| PD7518a | Substitution | Y  | 17701139  | 17701139  | -               | -                | -         | -       | -                | - | G | A |
| PD7518a | Substitution | Y  | 22985124  | 22985124  | -               | -                | -         | -       | -                | - | A | G |
| PD7520a | Indel        | 1  | 18269611  | 18269611  | -               | -                | -         | -       | -                | - | - | - |
| PD7520a | Substitution | 1  | 33449497  | 33449497  | -               | -                | -         | -       | -                | - | G | A |
| PD7520a | Substitution | 1  | 50410578  | 50410578  | AGBL4           | CCDS44137.1      | Intronic  | -       | -                | - | G | C |
| PD7520a | Substitution | 1  | 61183814  | 61183814  | -               | -                | -         | -       | -                | - | G | A |
| PD7520a | Substitution | 1  | 61466615  | 61466615  | NFIA            | ENST00000371191  | Intronic  | -       | -                | - | T | C |
| PD7520a | Substitution | 1  | 66158451  | 66158451  | -               | -                | -         | -       | -                | - | G | A |
| PD7520a | Substitution | 1  | 70073433  | 70073433  | LRRC7           | ENST00000310961  | Intronic  | -       | -                | - | G | C |
| PD7520a | Substitution | 1  | 72419795  | 72419795  | NEGR1           | CCDS661.1        | Intronic  | -       | -                | - | G | C |
| PD7520a | Substitution | 1  | 74952791  | 74952791  | TNNI3K          | CCDS44161.1      | Intronic  | -       | -                | - | C | T |
| PD7520a | Substitution | 1  | 75869720  | 75869720  | SLC44A5         | CCDS667.1        | Intronic  | -       | -                | - | A | C |
| PD7520a | Substitution | 1  | 78797102  | 78797102  | PTGFR           | CCDS686.1        | Intronic  | -       | -                | - | A | T |
| PD7520a | Substitution | 1  | 78851201  | 78851201  | PTGFR           | CCDS686.1        | Intronic  | -       | -                | - | C | T |
| PD7520a | Substitution | 1  | 83083521  | 83083521  | -               | -                | -         | -       | -                | - | T | G |
| PD7520a | Indel        | 1  | 85854280  | 85854281  | -               | -                | -         | -       | -                | - | - | - |
| PD7520a | Substitution | 1  | 87241541  | 87241541  | -               | -                | -         | -       | -                | - | C | G |
| PD7520a | Substitution | 1  | 88165462  | 88165462  | -               | -                | -         | -       | -                | - | C | A |
| PD7520a | Substitution | 1  | 89342133  | 89342133  | GTF2B           | CCDS715.1        | Intronic  | -       | -                | - | T | C |
| PD7520a | Substitution | 1  | 96929893  | 96929893  | -               | -                | -         | -       | -                | - | C | T |
| PD7520a | Substitution | 1  | 97093782  | 97093782  | -               | -                | -         | -       | -                | - | G | T |
| PD7520a | Substitution | 1  | 107881698 | 107881698 | NTNG1           | CCDS44180.1      | Intronic  | -       | -                | - | A | C |
| PD7520a | Substitution | 1  | 109615056 | 109615056 | TAF13           | CCDS30788.1      | Intronic  | -       | -                | - | T | A |
| PD7520a | Substitution | 1  | 109725706 | 109725706 | KIAA1324        | CCDS794.1        | Intronic  | -       | -                | - | A | G |
| PD7520a | Substitution | 1  | 110327823 | 110327823 | -               | -                | -         | -       | -                | - | A | T |
| PD7520a | Substitution | 1  | 110925668 | 110925668 | SLC16A4         | CCDS823.1        | Intronic  | -       | -                | - | A | T |
| PD7520a | Substitution | 1  | 116809378 | 116809378 | -               | -                | -         | -       | -                | - | C | T |
| PD7520a | Substitution | 1  | 146963724 | 146963724 | -               | -                | -         | -       | -                | - | C | G |
| PD7520a | Substitution | 1  | 152610257 | 152610257 | -               | -                | -         | -       | -                | - | T | G |
| PD7520a | Substitution | 1  | 153989157 | 153989157 | NUP210L         | CCDS41399.1      | Intronic  | -       | -                | - | C | T |
| PD7520a | Substitution | 1  | 158200986 | 158200986 | -               | -                | -         | -       | -                | - | C | A |
| PD7520a | Substitution | 1  | 158212692 | 158212692 | -               | -                | -         | -       | -                | - | A | G |
| PD7520a | Substitution | 1  | 159031632 | 159031632 | -               | -                | -         | -       | -                | - | T | C |
| PD7520a | Substitution | 1  | 182484961 | 182484961 | -               | -                | -         | -       | -                | - | G | A |
| PD7520a | Substitution | 1  | 190063373 | 190063373 | -               | -                | -         | -       | -                | - | T | A |
| PD7520a | Indel        | 1  | 190311403 | 190311403 | -               | -                | -         | -       | -                | - | - | - |
| PD7520a | Substitution | 1  | 194649464 | 194649464 | -               | -                | -         | -       | -                | - | C | T |
| PD7520a | Substitution | 1  | 195492670 | 195492670 | -               | -                | -         | -       | -                | - | T | A |
| PD7520a | Substitution | 1  | 211186235 | 211186235 | KCNH1           | CCDS31015.1      | Intronic  | -       | -                | - | G | A |
| PD7520a | Substitution | 1  | 220566925 | 220566925 | -               | -                | -         | -       | -                | - | G | T |
| PD7520a | Substitution | 1  | 228294580 | 228294580 | MRPL55          | CCDS44325.1      | c.376C>T  | p.R126W | Missense         | - | G | A |
| PD7520a | Substitution | 1  | 229146157 | 229146157 | -               | -                | -         | -       | -                | - | C | A |
| PD7520a | Substitution | 1  | 232110053 | 232110053 | DISC1           | ENST00000439617  | Intronic  | -       | -                | - | G | A |
| PD7520a | Indel        | 1  | 236006568 | 236006581 | -               | -                | -         | -       | -                | - | - | - |
| PD7520a | Substitution | 1  | 239178503 | 239178503 | -               | -                | -         | -       | -                | - | T | A |
| PD7520a | Substitution | 1  | 240765654 | 240765654 | GREM2           | CCDS31070.1      | Intronic  | -       | -                | - | A | T |
| PD7520a | Substitution | 1  | 241480364 | 241480364 | RGS7            | CCDS31071.1      | Intronic  | -       | -                | - | G | C |
| PD7520a | Substitution | 1  | 244339331 | 244339331 | -               | -                | -         | -       | -                | - | G | A |
| PD7520a | Substitution | 1  | 245620949 | 245620949 | KIF26B          | CCDS44342.1      | Intronic  | -       | -                | - | A | T |
| PD7520a | Substitution | 1  | 248048554 | 248048554 | -               | -                | -         | -       | -                | - | G | T |
| PD7520a | Substitution | 1  | 248319858 | 248319858 | -               | -                | -         | -       | -                | - | C | T |
| PD7520a | Substitution | 2  | 969204    | 969204    | SNTG2           | CCDS46220.1      | Intronic  | -       | -                | - | G | A |
| PD7520a | Substitution | 2  | 4826902   | 4826902   | -               | -                | -         | -       | -                | - | A | G |
| PD7520a | Substitution | 2  | 6833338   | 6833338   | -               | -                | -         | -       | -                | - | G | A |
| PD7520a | Substitution | 2  | 15867968  | 15867968  | ENSG00000231031 | ENST00000436967  | Intronic  | -       | -                | - | C | G |
| PD7520a | Substitution | 2  | 27639290  | 27639290  | -               | -                | -         | -       | -                | - | A | G |
| PD7520a | Substitution | 2  | 32004631  | 32004631  | -               | -                | -         | -       | -                | - | C | T |
| PD7520a | Substitution | 2  | 37010588  | 37010588  | VIT             | CCDS33180.1      | Intronic  | -       | -                | - | C | T |
| PD7520a | Substitution | 2  | 43920276  | 43920276  | PLEKHH2         | CCDS1812.1       | Intronic  | -       | -                | - | G | T |
| PD7520a | Substitution | 2  | 49780038  | 49780038  | -               | -                | -         | -       | -                | - | G | C |
| PD7520a | Substitution | 2  | 50528262  | 50528262  | NRXN1           | CCDS46282.1      | Intronic  | -       | -                | - | A | C |
| PD7520a | Substitution | 2  | 52451819  | 52451819  | -               | -                | -         | -       | -                | - | T | A |
| PD7520a | Substitution | 2  | 57161254  | 57161254  | -               | -                | -         | -       | -                | - | G | T |
| PD7520a | Substitution | 2  | 58766246  | 58766246  | -               | -                | -         | -       | -                | - | A | T |
| PD7520a | Substitution | 2  | 60805756  | 60805756  | -               | -                | -         | -       | -                | - | G | T |
| PD7520a | Substitution | 2  | 75720737  | 75720737  | FAM176A         | CCDS1959.1       | c.86-2A>G | p.?     | Essential Splice | - | T | C |
| PD7520a | Substitution | 2  | 82892321  | 82892321  | -               | -                | -         | -       | -                | - | G | C |
| PD7520a | Substitution | 2  | 84239937  | 84239937  | -               | -                | -         | -       | -                | - | C | T |
| PD7520a | Substitution | 2  | 84244722  | 84244722  | -               | -                | -         | -       | -                | - | A | T |
| PD7520a | Substitution | 2  | 89362429  | 89362429  | -               | -                | -         | -       | -                | - | A | T |
| PD7520a | Substitution | 2  | 95991168  | 95991168  | KCNIP3          | CCDS2013.1       | Intronic  | -       | -                | - | C | T |
| PD7520a | Substitution | 2  | 101026187 | 101026187 | CHST10          | CCDS2047.1       | Intronic  | -       | -                | - | C | T |
| PD7520a | Substitution | 2  | 124210025 | 124210025 | -               | -                | -         | -       | -                | - | T | C |
| PD7520a | Substitution | 2  | 125816882 | 125816882 | -               | -                | -         | -       | -                | - | G | T |
| PD7520a | Substitution | 2  | 125882532 | 125882532 | -               | -                | -         | -       | -                | - | G | T |
| PD7520a | Substitution | 2  | 129771556 | 129771556 | -               | -                | -         | -       | -                | - | G | A |
| PD7520a | Substitution | 2  | 129786132 | 129786132 | -               | -                | -         | -       | -                | - | G | A |
| PD7520a | Substitution | 2  | 131455923 | 131455923 | -               | -                | -         | -       | -                | - | G | T |
| PD7520a | Substitution | 2  | 134053852 | 134053852 | NCKAP5          | CCDS46418.1      | Intronic  | -       | -                | - | G | T |
| PD7520a | Substitution | 2  | 140222239 | 140222239 | -               | -                | -         | -       | -                | - | T | A |
| PD7520a | Substitution | 2  | 146315169 | 146315169 | -               | -                | -         | -       | -                | - | G | T |





|         |              |    |           |           |                 |                 |          |   |   |   |   |   |   |
|---------|--------------|----|-----------|-----------|-----------------|-----------------|----------|---|---|---|---|---|---|
| PD7520a | Substitution | 8  | 65306507  | 65306507  | -               | -               | -        | - | - | - | - | A | T |
| PD7520a | Substitution | 8  | 72773575  | 72773575  | AC016057.1      | ENST00000457356 | Intronic | - | - | - | - | A | G |
| PD7520a | Substitution | 8  | 77366254  | 77366254  | -               | -               | -        | - | - | - | - | G | T |
| PD7520a | Substitution | 8  | 79323200  | 79323200  | -               | -               | -        | - | - | - | - | C | A |
| PD7520a | Substitution | 8  | 85372090  | 85372090  | -               | -               | -        | - | - | - | - | C | A |
| PD7520a | Substitution | 8  | 92630174  | 92630174  | -               | -               | -        | - | - | - | - | C | A |
| PD7520a | Substitution | 8  | 92934249  | 92934249  | -               | -               | -        | - | - | - | - | A | G |
| PD7520a | Substitution | 8  | 94475840  | 94475840  | AC011118.2      | ENST00000501400 | Intronic | - | - | - | - | G | A |
| PD7520a | Indel        | 8  | 97572181  | 97572181  | -               | -               | -        | - | - | - | - | - | - |
| PD7520a | Substitution | 8  | 108523879 | 108523879 | -               | -               | -        | - | - | - | - | G | A |
| PD7520a | Substitution | 8  | 108566821 | 108566821 | -               | -               | -        | - | - | - | - | T | G |
| PD7520a | Substitution | 8  | 111174616 | 111174616 | -               | -               | -        | - | - | - | - | C | A |
| PD7520a | Substitution | 8  | 111854773 | 111854773 | -               | -               | -        | - | - | - | - | A | T |
| PD7520a | Substitution | 8  | 112228515 | 112228515 | -               | -               | -        | - | - | - | - | G | C |
| PD7520a | Substitution | 8  | 112495871 | 112495871 | -               | -               | -        | - | - | - | - | T | C |
| PD7520a | Substitution | 8  | 115718944 | 115718944 | -               | -               | -        | - | - | - | - | A | G |
| PD7520a | Substitution | 8  | 115941780 | 115941780 | -               | -               | -        | - | - | - | - | A | G |
| PD7520a | Substitution | 8  | 120374344 | 120374344 | -               | -               | -        | - | - | - | - | C | A |
| PD7520a | Substitution | 8  | 125928105 | 125928105 | -               | -               | -        | - | - | - | - | T | C |
| PD7520a | Substitution | 8  | 129593163 | 129593163 | -               | -               | -        | - | - | - | - | A | G |
| PD7520a | Substitution | 8  | 132252442 | 132252442 | -               | -               | -        | - | - | - | - | G | C |
| PD7520a | Substitution | 9  | 8920468   | 8920468   | PTPRD           | CCDS43786.1     | Intronic | - | - | - | - | C | A |
| PD7520a | Substitution | 9  | 17628146  | 17628146  | SH3GL2          | CCDS6483.1      | Intronic | - | - | - | - | C | T |
| PD7520a | Substitution | 9  | 20758041  | 20758041  | KIAA1797        | CCDS34993.1     | Intronic | - | - | - | - | G | T |
| PD7520a | Substitution | 9  | 24180847  | 24180847  | -               | -               | -        | - | - | - | - | A | T |
| PD7520a | Substitution | 9  | 28454984  | 28454984  | LINGO2          | CCDS6524.1      | Intronic | - | - | - | - | A | G |
| PD7520a | Substitution | 9  | 29283581  | 29283581  | -               | -               | -        | - | - | - | - | G | T |
| PD7520a | Substitution | 9  | 30123869  | 30123869  | -               | -               | -        | - | - | - | - | G | A |
| PD7520a | Substitution | 9  | 31799590  | 31799590  | -               | -               | -        | - | - | - | - | C | A |
| PD7520a | Substitution | 9  | 42502400  | 42502400  | -               | -               | -        | - | - | - | - | G | A |
| PD7520a | Substitution | 9  | 79711100  | 79711100  | -               | -               | -        | - | - | - | - | C | T |
| PD7520a | Substitution | 9  | 81000595  | 81000595  | -               | -               | -        | - | - | - | - | T | A |
| PD7520a | Substitution | 9  | 85232832  | 85232832  | -               | -               | -        | - | - | - | - | G | A |
| PD7520a | Substitution | 9  | 87183686  | 87183686  | -               | -               | -        | - | - | - | - | G | T |
| PD7520a | Indel        | 9  | 88995374  | 88995374  | -               | -               | -        | - | - | - | - | - | - |
| PD7520a | Substitution | 9  | 97073352  | 97073352  | -               | -               | -        | - | - | - | - | G | C |
| PD7520a | Substitution | 9  | 97122570  | 97122570  | -               | -               | -        | - | - | - | - | G | T |
| PD7520a | Substitution | 9  | 116453530 | 116453530 | -               | -               | -        | - | - | - | - | C | A |
| PD7520a | Substitution | 9  | 118466813 | 118466813 | -               | -               | -        | - | - | - | - | C | T |
| PD7520a | Substitution | 9  | 128827733 | 128827733 | -               | -               | -        | - | - | - | - | G | A |
| PD7520a | Substitution | 10 | 2192427   | 2192427   | -               | -               | -        | - | - | - | - | A | T |
| PD7520a | Substitution | 10 | 2727317   | 2727317   | -               | -               | -        | - | - | - | - | G | T |
| PD7520a | Substitution | 10 | 6679889   | 6679889   | -               | -               | -        | - | - | - | - | C | A |
| PD7520a | Substitution | 10 | 8855966   | 8855966   | -               | -               | -        | - | - | - | - | A | C |
| PD7520a | Substitution | 10 | 8855968   | 8855968   | -               | -               | -        | - | - | - | - | A | C |
| PD7520a | Substitution | 10 | 9237532   | 9237532   | -               | -               | -        | - | - | - | - | C | T |
| PD7520a | Substitution | 10 | 10673506  | 10673506  | -               | -               | -        | - | - | - | - | G | C |
| PD7520a | Substitution | 10 | 13391963  | 13391963  | -               | -               | -        | - | - | - | - | C | G |
| PD7520a | Substitution | 10 | 14958904  | 14958904  | DCLRE1C         | CCDS7105.1      | Intronic | - | - | - | - | G | A |
| PD7520a | Substitution | 10 | 37510983  | 37510983  | ANKRD30A        | CCDS7193.1      | Intronic | - | - | - | - | C | A |
| PD7520a | Substitution | 10 | 44584483  | 44584483  | -               | -               | -        | - | - | - | - | G | A |
| PD7520a | Substitution | 10 | 45270402  | 45270402  | -               | -               | -        | - | - | - | - | T | A |
| PD7520a | Substitution | 10 | 53779899  | 53779899  | PRKG1           | CCDS7244.1      | Intronic | - | - | - | - | A | G |
| PD7520a | Substitution | 10 | 54451452  | 54451452  | -               | -               | -        | - | - | - | - | C | T |
| PD7520a | Substitution | 10 | 67280178  | 67280178  | -               | -               | -        | - | - | - | - | C | A |
| PD7520a | Substitution | 10 | 69839264  | 69839264  | -               | -               | -        | - | - | - | - | A | G |
| PD7520a | Substitution | 10 | 71480342  | 71480342  | -               | -               | -        | - | - | - | - | G | A |
| PD7520a | Substitution | 10 | 85096111  | 85096111  | -               | -               | -        | - | - | - | - | G | T |
| PD7520a | Substitution | 10 | 96760738  | 96760738  | -               | -               | -        | - | - | - | - | A | T |
| PD7520a | Substitution | 10 | 102492235 | 102492235 | -               | -               | -        | - | - | - | - | G | T |
| PD7520a | Substitution | 10 | 103328307 | 103328307 | -               | -               | -        | - | - | - | - | C | T |
| PD7520a | Substitution | 10 | 110134963 | 110134963 | -               | -               | -        | - | - | - | - | A | G |
| PD7520a | Substitution | 10 | 119005576 | 119005576 | SLC18A2         | CCDS7599.1      | Intronic | - | - | - | - | G | T |
| PD7520a | Substitution | 10 | 119345621 | 119345621 | -               | -               | -        | - | - | - | - | G | A |
| PD7520a | Substitution | 10 | 128568216 | 128568216 | -               | -               | -        | - | - | - | - | T | A |
| PD7520a | Substitution | 10 | 130597349 | 130597349 | -               | -               | -        | - | - | - | - | T | G |
| PD7520a | Substitution | 10 | 131954929 | 131954929 | GLRX3           | CCDS7661.1      | Intronic | - | - | - | - | C | G |
| PD7520a | Substitution | 10 | 132868414 | 132868414 | -               | -               | -        | - | - | - | - | C | T |
| PD7520a | Substitution | 11 | 7235062   | 7235062   | -               | -               | -        | - | - | - | - | G | A |
| PD7520a | Substitution | 11 | 11615802  | 11615802  | GALNTL4         | CCDS7807.1      | Intronic | - | - | - | - | C | G |
| PD7520a | Substitution | 11 | 21830242  | 21830242  | -               | -               | -        | - | - | - | - | T | G |
| PD7520a | Substitution | 11 | 22431890  | 22431890  | -               | -               | -        | - | - | - | - | T | A |
| PD7520a | Substitution | 11 | 25317848  | 25317848  | -               | -               | -        | - | - | - | - | T | A |
| PD7520a | Substitution | 11 | 38652158  | 38652158  | -               | -               | -        | - | - | - | - | A | T |
| PD7520a | Substitution | 11 | 43304957  | 43304957  | -               | -               | -        | - | - | - | - | C | G |
| PD7520a | Substitution | 11 | 47341800  | 47341800  | MADD            | CCDS7930.1      | Intronic | - | - | - | - | G | A |
| PD7520a | Substitution | 11 | 49844484  | 49844484  | -               | -               | -        | - | - | - | - | A | T |
| PD7520a | Substitution | 11 | 58251811  | 58251811  | -               | -               | -        | - | - | - | - | C | T |
| PD7520a | Substitution | 11 | 63520189  | 63520189  | RTN3            | CCDS8050.1      | Intronic | - | - | - | - | C | G |
| PD7520a | Substitution | 11 | 70557569  | 70557569  | SHANK2          | ENST00000338508 | Intronic | - | - | - | - | G | A |
| PD7520a | Substitution | 11 | 73701093  | 73701093  | -               | -               | -        | - | - | - | - | C | T |
| PD7520a | Substitution | 11 | 80827869  | 80827869  | -               | -               | -        | - | - | - | - | T | G |
| PD7520a | Substitution | 11 | 88945841  | 88945841  | TYR             | CCDS8284.1      | Intronic | - | - | - | - | G | A |
| PD7520a | Substitution | 11 | 96639293  | 96639293  | -               | -               | -        | - | - | - | - | G | A |
| PD7520a | Substitution | 11 | 98742689  | 98742689  | -               | -               | -        | - | - | - | - | G | T |
| PD7520a | Substitution | 11 | 103374282 | 103374282 | -               | -               | -        | - | - | - | - | A | T |
| PD7520a | Substitution | 11 | 116091860 | 116091860 | -               | -               | -        | - | - | - | - | C | T |
| PD7520a | Substitution | 11 | 123431807 | 123431807 | GRAMD1B         | ENST00000456860 | Intronic | - | - | - | - | G | A |
| PD7520a | Substitution | 11 | 126446529 | 126446529 | -               | -               | -        | - | - | - | - | C | A |
| PD7520a | Substitution | 11 | 126950860 | 126950860 | -               | -               | -        | - | - | - | - | T | A |
| PD7520a | Substitution | 11 | 133114426 | 133114426 | ENSG00000183715 | CCDS31722.1     | Intronic | - | - | - | - | C | A |
| PD7520a | Substitution | 12 | 10604233  | 10604233  | KLRC1           | CCDS8625.1      | Intronic | - | - | - | - | C | T |
| PD7520a | Substitution | 12 | 12098888  | 12098888  | -               | -               | -        | - | - | - | - | A | C |
| PD7520a | Substitution | 12 | 13076991  | 13076991  | -               | -               | -        | - | - | - | - | G | A |
| PD7520a | Substitution | 12 | 16637240  | 16637240  | -               | -               | -        | - | - | - | - | G | T |
| PD7520a | Substitution | 12 | 18118371  | 18118371  | -               | -               | -        | - | - | - | - | C | A |
| PD7520a | Substitution | 12 | 30387286  | 30387286  | -               | -               | -        | - | - | - | - | G | T |
| PD7520a | Substitution | 12 | 31151692  | 31151692  | -               | -               | -        | - | - | - | - | G | A |
| PD7520a | Substitution | 12 | 39191645  | 39191645  | CPNE8           | CCDS8733.1      | Intronic | - | - | - | - | A | G |
| PD7520a | Substitution | 12 | 53951167  | 53951167  | ATF7            | CCDS44905.1     | Intronic | - | - | - | - | G | A |
| PD7520a | Substitution | 12 | 70824102  | 70824102  | KCNMB4          | CCDS8997.1      | Intronic | - | - | - | - | C | G |
| PD7520a | Substitution | 12 | 74404136  | 74404136  | -               | -               | -        | - | - | - | - | T | C |
| PD7520a | Substitution | 12 | 75218528  | 75218528  | -               | -               | -        | - | - | - | - | G | A |
| PD7520a | Substitution | 12 | 77363106  | 77363106  | -               | -               | -        | - | - | - | - | C | G |
| PD7520a | Substitution | 12 | 81914214  | 81914214  | PPFIA2          | ENST00000443686 | Intronic | - | - | - | - | A | G |
| PD7520a | Substitution | 12 | 85363694  | 85363694  | -               | -               | -        | - | - | - | - | A | T |
| PD7520a | Substitution | 12 | 88038531  | 88038531  | -               | -               | -        | - | - | - | - | T | A |
| PD7520a | Substitution | 12 | 88306357  | 88306357  | -               | -               | -        | - | - | - | - | G | A |
| PD7520a | Substitution | 12 | 89318570  | 89318570  | -               | -               | -        | - | - | - | - | C | A |
| PD7520a | Substitution | 12 | 97331521  | 97331521  | NEDD1           | CCDS9063.1      | Intronic | - | - | - | - | T | T |
| PD7520a | Substitution | 12 | 118065277 | 118065277 | KSR2            | ENST00000425217 | Intronic | - | - | - | - | C | T |



|         |              |    |           |           |          |                 |            |           |            |   |   |   |
|---------|--------------|----|-----------|-----------|----------|-----------------|------------|-----------|------------|---|---|---|
| PD7520a | Substitution | 21 | 41290227  | 41290227  | PCP4     | CCDS33563.1     | Intronic   | -         | -          | - | G | A |
| PD7520a | Substitution | 21 | 46191773  | 46191773  | UBE2G2   | CCDS13714.1     | Intronic   | -         | -          | - | T | C |
| PD7520a | Substitution | 22 | 17345613  | 17345613  | -        | -               | -          | -         | -          | - | G | A |
| PD7520a | Substitution | 22 | 49495358  | 49495358  | -        | -               | -          | -         | -          | - | A | G |
| PD7520a | Substitution | 22 | 50010352  | 50010352  | -        | -               | -          | -         | -          | - | C | T |
| PD7520a | Substitution | X  | 19454461  | 19454461  | MAP3K15  | CCDS35212.1     | Intronic   | -         | -          | - | C | T |
| PD7520a | Substitution | X  | 20652763  | 20652763  | -        | -               | -          | -         | -          | - | C | A |
| PD7520a | Substitution | X  | 23446859  | 23446859  | -        | -               | -          | -         | -          | - | A | G |
| PD7520a | Substitution | X  | 32809368  | 32809368  | DMD      | CCDS14233.1     | Intronic   | -         | -          | - | T | G |
| PD7520a | Substitution | X  | 41822521  | 41822521  | -        | -               | -          | -         | -          | - | C | T |
| PD7520a | Substitution | X  | 53797712  | 53797712  | -        | -               | -          | -         | -          | - | G | A |
| PD7520a | Substitution | X  | 66030758  | 66030758  | -        | -               | -          | -         | -          | - | C | T |
| PD7520a | Substitution | X  | 81759283  | 81759283  | -        | -               | -          | -         | -          | - | G | A |
| PD7520a | Substitution | X  | 86409990  | 86409990  | -        | -               | -          | -         | -          | - | C | G |
| PD7520a | Substitution | X  | 89522993  | 89522993  | -        | -               | -          | -         | -          | - | C | A |
| PD7520a | Substitution | X  | 89659849  | 89659849  | -        | -               | -          | -         | -          | - | A | T |
| PD7520a | Substitution | X  | 90519523  | 90519523  | -        | -               | -          | -         | -          | - | A | T |
| PD7520a | Substitution | X  | 91746748  | 91746748  | PCDH11X  | CCDS14461.1     | Intronic   | -         | -          | - | G | A |
| PD7520a | Substitution | X  | 94133349  | 94133349  | -        | -               | -          | -         | -          | - | T | C |
| PD7520a | Substitution | X  | 95367574  | 95367574  | -        | -               | -          | -         | -          | - | T | G |
| PD7520a | Indel        | X  | 104006051 | 104006051 | -        | -               | -          | -         | -          | - | - | - |
| PD7520a | Substitution | X  | 138445678 | 138445678 | -        | -               | -          | -         | -          | - | G | C |
| PD7520a | Substitution | X  | 142064157 | 142064157 | -        | -               | -          | -         | -          | - | T | G |
| PD7520a | Substitution | X  | 146027654 | 146027654 | -        | -               | -          | -         | -          | - | C | A |
| PD7520a | Substitution | X  | 150903454 | 150903454 | -        | -               | -          | -         | -          | - | A | G |
| PD7520a | Substitution | Y  | 4432281   | 4432281   | -        | -               | -          | -         | -          | - | A | C |
| PD7520a | Substitution | Y  | 5182444   | 5182444   | PCDH11Y  | ENST00000400457 | Intronic   | -         | -          | - | C | T |
| PD7520a | Substitution | Y  | 21543691  | 21543691  | -        | -               | -          | -         | -          | - | A | G |
| PD7520a | Substitution | Y  | 23422289  | 23422289  | -        | -               | -          | -         | -          | - | G | A |
| PD7522a | Substitution | 1  | 3833332   | 3833332   | -        | -               | -          | -         | -          | - | G | T |
| PD7522a | Substitution | 1  | 12930659  | 12930659  | -        | -               | -          | -         | -          | - | G | T |
| PD7522a | Substitution | 1  | 22682989  | 22682989  | -        | -               | -          | -         | -          | - | C | T |
| PD7522a | Substitution | 1  | 32678192  | 32678192  | DCDC2B   | CCDS44100.1     | c.629A>T   | p.Y210F   | Missense   | - | A | T |
| PD7522a | Substitution | 1  | 33867852  | 33867852  | -        | -               | -          | -         | -          | - | C | G |
| PD7522a | Substitution | 1  | 37093448  | 37093448  | -        | -               | -          | -         | -          | - | C | A |
| PD7522a | Substitution | 1  | 37615534  | 37615534  | -        | -               | -          | -         | -          | - | G | A |
| PD7522a | Substitution | 1  | 42080750  | 42080750  | HIVEP3   | CCDS44124.1     | Intronic   | -         | -          | - | C | A |
| PD7522a | Substitution | 1  | 42511635  | 42511635  | -        | -               | -          | -         | -          | - | A | G |
| PD7522a | Substitution | 1  | 53123024  | 53123024  | -        | -               | -          | -         | -          | - | A | G |
| PD7522a | Substitution | 1  | 57313295  | 57313295  | -        | -               | -          | -         | -          | - | T | C |
| PD7522a | Substitution | 1  | 61802100  | 61802100  | NFIA     | CCDS44156.1     | Intronic   | -         | -          | - | G | A |
| PD7522a | Substitution | 1  | 67445656  | 67445656  | MIER1    | CCDS41348.1     | Intronic   | -         | -          | - | A | T |
| PD7522a | Substitution | 1  | 67708392  | 67708392  | IL23R    | CCDS637.1       | Intronic   | -         | -          | - | C | T |
| PD7522a | Substitution | 1  | 68862135  | 68862135  | -        | -               | -          | -         | -          | - | G | A |
| PD7522a | Substitution | 1  | 69268194  | 69268194  | -        | -               | -          | -         | -          | - | C | T |
| PD7522a | Substitution | 1  | 73507195  | 73507195  | -        | -               | -          | -         | -          | - | C | A |
| PD7522a | Substitution | 1  | 74172967  | 74172967  | -        | -               | -          | -         | -          | - | C | T |
| PD7522a | Substitution | 1  | 78901405  | 78901405  | PTGFR    | CCDS686.1       | Intronic   | -         | -          | - | G | A |
| PD7522a | Substitution | 1  | 80802922  | 80802922  | -        | -               | -          | -         | -          | - | T | A |
| PD7522a | Substitution | 1  | 80898403  | 80898403  | -        | -               | -          | -         | -          | - | G | T |
| PD7522a | Substitution | 1  | 81602958  | 81602958  | -        | -               | -          | -         | -          | - | G | A |
| PD7522a | Substitution | 1  | 81669010  | 81669010  | -        | -               | -          | -         | -          | - | G | T |
| PD7522a | Substitution | 1  | 81757584  | 81757584  | -        | -               | -          | -         | -          | - | C | A |
| PD7522a | Substitution | 1  | 82239478  | 82239478  | LPHN2    | CCDS689.1       | Intronic   | -         | -          | - | T | C |
| PD7522a | Substitution | 1  | 82853264  | 82853264  | -        | -               | -          | -         | -          | - | T | C |
| PD7522a | Substitution | 1  | 86794046  | 86794046  | -        | -               | -          | -         | -          | - | T | A |
| PD7522a | Substitution | 1  | 87808991  | 87808991  | LMO4     | CCDS713.1       | Intronic   | -         | -          | - | C | G |
| PD7522a | Substitution | 1  | 93158898  | 93158898  | EVIS     | CCDS30774.1     | Intronic   | -         | -          | - | A | C |
| PD7522a | Substitution | 1  | 96044503  | 96044503  | -        | -               | -          | -         | -          | - | A | T |
| PD7522a | Substitution | 1  | 100509443 | 100509443 | HIAT1    | CCDS763.1       | Intronic   | -         | -          | - | C | G |
| PD7522a | Substitution | 1  | 111749085 | 111749085 | -        | -               | -          | -         | -          | - | T | C |
| PD7522a | Substitution | 1  | 112763324 | 112763324 | -        | -               | -          | -         | -          | - | G | T |
| PD7522a | Substitution | 1  | 152325109 | 152325109 | FLG2     | CCDS30861.1     | c.5153C>A  | p.S1718Y  | Missense   | - | G | T |
| PD7522a | Substitution | 1  | 160430608 | 160430608 | -        | -               | -          | -         | -          | - | A | T |
| PD7522a | Substitution | 1  | 163085105 | 163085105 | -        | -               | -          | -         | -          | - | T | G |
| PD7522a | Substitution | 1  | 163574475 | 163574475 | -        | -               | -          | -         | -          | - | G | A |
| PD7522a | Substitution | 1  | 172191406 | 172191406 | DNM3     | CCDS44276.1     | Intronic   | -         | -          | - | C | T |
| PD7522a | Substitution | 1  | 179294489 | 179294489 | SOAT1    | CCDS1330.1      | Intronic   | -         | -          | - | G | A |
| PD7522a | Substitution | 1  | 181299338 | 181299338 | -        | -               | -          | -         | -          | - | C | T |
| PD7522a | Substitution | 1  | 188651984 | 188651984 | -        | -               | -          | -         | -          | - | C | T |
| PD7522a | Substitution | 1  | 188954643 | 188954643 | -        | -               | -          | -         | -          | - | T | C |
| PD7522a | Substitution | 1  | 190086725 | 190086725 | FAM5C    | CCDS1373.1      | Intronic   | -         | -          | - | G | A |
| PD7522a | Substitution | 1  | 193507351 | 193507351 | -        | -               | -          | -         | -          | - | G | C |
| PD7522a | Substitution | 1  | 195577488 | 195577488 | -        | -               | -          | -         | -          | - | T | A |
| PD7522a | Substitution | 1  | 195634746 | 195634746 | -        | -               | -          | -         | -          | - | G | A |
| PD7522a | Substitution | 1  | 196054123 | 196054123 | -        | -               | -          | -         | -          | - | C | G |
| PD7522a | Substitution | 1  | 198093478 | 198093478 | -        | -               | -          | -         | -          | - | T | A |
| PD7522a | Substitution | 1  | 200156753 | 200156753 | -        | -               | -          | -         | -          | - | C | A |
| PD7522a | Substitution | 1  | 203572109 | 203572109 | -        | -               | -          | -         | -          | - | C | T |
| PD7522a | Substitution | 1  | 206240414 | 206240414 | C1orf186 | ENST00000331555 | Intronic   | -         | -          | - | A | T |
| PD7522a | Substitution | 1  | 209397492 | 209397492 | -        | -               | -          | -         | -          | - | T | C |
| PD7522a | Substitution | 1  | 214233506 | 214233506 | -        | -               | -          | -         | -          | - | C | G |
| PD7522a | Substitution | 1  | 237528236 | 237528236 | RYR2     | ENST00000366574 | Intronic   | -         | -          | - | C | G |
| PD7522a | Substitution | 1  | 242186861 | 242186861 | -        | -               | -          | -         | -          | - | G | A |
| PD7522a | Substitution | 1  | 244640732 | 244640732 | C1orf101 | CCDS44340.1     | Intronic   | -         | -          | - | G | A |
| PD7522a | Substitution | 1  | 245866093 | 245866093 | KIF26B   | ENST00000366518 | Non-coding | r.5473g>u | 3prime UTR | - | G | T |
| PD7522a | Substitution | 2  | 121767    | 121767    | -        | -               | -          | -         | -          | - | G | A |
| PD7522a | Substitution | 2  | 6305539   | 6305539   | -        | -               | -          | -         | -          | - | G | T |
| PD7522a | Substitution | 2  | 11810408  | 11810408  | -        | -               | -          | -         | -          | - | G | T |
| PD7522a | Substitution | 2  | 12757904  | 12757904  | -        | -               | -          | -         | -          | - | T | G |
| PD7522a | Substitution | 2  | 16613939  | 16613939  | -        | -               | -          | -         | -          | - | C | T |
| PD7522a | Substitution | 2  | 16893658  | 16893658  | -        | -               | -          | -         | -          | - | G | T |
| PD7522a | Substitution | 2  | 17391726  | 17391726  | -        | -               | -          | -         | -          | - | C | T |
| PD7522a | Substitution | 2  | 20370525  | 20370525  | -        | -               | -          | -         | -          | - | G | A |
| PD7522a | Substitution | 2  | 21227116  | 21227116  | APOB     | CCDS1703.1      | Intronic   | -         | -          | - | G | A |
| PD7522a | Substitution | 2  | 51070456  | 51070456  | NRXN1    | CCDS46282.1     | Intronic   | -         | -          | - | T | C |
| PD7522a | Substitution | 2  | 51070457  | 51070457  | NRXN1    | CCDS46282.1     | Intronic   | -         | -          | - | G | T |
| PD7522a | Substitution | 2  | 54441822  | 54441822  | ACYP2    | CCDS1850.1      | Intronic   | -         | -          | - | A | T |
| PD7522a | Substitution | 2  | 65278485  | 65278485  | -        | -               | -          | -         | -          | - | T | A |
| PD7522a | Substitution | 2  | 75567300  | 75567300  | -        | -               | -          | -         | -          | - | T | A |
| PD7522a | Substitution | 2  | 81179593  | 81179593  | -        | -               | -          | -         | -          | - | G | C |
| PD7522a | Substitution | 2  | 81538892  | 81538892  | -        | -               | -          | -         | -          | - | C | T |
| PD7522a | Substitution | 2  | 82449612  | 82449612  | -        | -               | -          | -         | -          | - | C | T |
| PD7522a | Substitution | 2  | 107680344 | 107680344 | -        | -               | -          | -         | -          | - | C | T |
| PD7522a | Substitution | 2  | 110283560 | 110283560 | -        | -               | -          | -         | -          | - | G | A |
| PD7522a | Indel        | 2  | 111784004 | 111784007 | -        | -               | -          | -         | -          | - | - | - |
| PD7522a | Substitution | 2  | 116021568 | 116021568 | DPP10    | CCDS46400.1     | Intronic   | -         | -          | - | C | T |
| PD7522a | Substitution | 2  | 117185798 | 117185798 | -        | -               | -          | -         | -          | - | T | G |
| PD7522a | Substitution | 2  | 119073857 | 119073857 | -        | -               | -          | -         | -          | - | G | A |
| PD7522a | Substitution | 2  | 124275134 | 124275134 | -        | -               | -          | -         | -          | - | T | G |
| PD7522a | Substitution | 2  | 135690150 | 135690150 | CCNT2    | CCDS2174.1      | Intronic   | -         | -          | - | T | C |





|         |              |   |           |           |          |                 |            |          |            |   |   |   |
|---------|--------------|---|-----------|-----------|----------|-----------------|------------|----------|------------|---|---|---|
| PD7522a | Substitution | 4 | 67340973  | 67340973  | -        | -               | -          | -        | -          | - | T | C |
| PD7522a | Substitution | 4 | 67496380  | 67496380  | -        | -               | -          | -        | -          | - | C | A |
| PD7522a | Substitution | 4 | 72374429  | 72374429  | SLC4A4   | CCDS3549.1      | Intronic   | -        | -          | - | C | G |
| PD7522a | Substitution | 4 | 72510820  | 72510820  | -        | -               | -          | -        | -          | - | T | A |
| PD7522a | Substitution | 4 | 73889489  | 73889489  | -        | -               | -          | -        | -          | - | G | T |
| PD7522a | Substitution | 4 | 80121150  | 80121150  | -        | -               | -          | -        | -          | - | A | T |
| PD7522a | Substitution | 4 | 84764852  | 84764852  | -        | -               | -          | -        | -          | - | G | A |
| PD7522a | Substitution | 4 | 84938330  | 84938330  | -        | -               | -          | -        | -          | - | T | C |
| PD7522a | Substitution | 4 | 86609022  | 86609022  | ARHGAP24 | CCDS34025.1     | Intronic   | -        | -          | - | T | A |
| PD7522a | Substitution | 4 | 88590620  | 88590620  | -        | -               | -          | -        | -          | - | G | A |
| PD7522a | Substitution | 4 | 90522767  | 90522767  | -        | -               | -          | -        | -          | - | C | T |
| PD7522a | Substitution | 4 | 91520457  | 91520457  | FAM190A  | CCDS47100.1     | Intronic   | -        | -          | - | A | T |
| PD7522a | Substitution | 4 | 94452084  | 94452084  | GRID2    | CCDS3637.1      | Intronic   | -        | -          | - | A | T |
| PD7522a | Substitution | 4 | 100410998 | 100410998 | -        | -               | -          | -        | -          | - | C | T |
| PD7522a | Substitution | 4 | 106019774 | 106019774 | -        | -               | -          | -        | -          | - | G | A |
| PD7522a | Substitution | 4 | 106998525 | 106998525 | TBCK     | CCDS3673.1      | Intronic   | -        | -          | - | T | A |
| PD7522a | Substitution | 4 | 109849276 | 109849276 | COL25A1  | CCDS43258.1     | Intronic   | -        | -          | - | C | A |
| PD7522a | Substitution | 4 | 116068127 | 116068127 | -        | -               | -          | -        | -          | - | T | A |
| PD7522a | Substitution | 4 | 116816321 | 116816321 | -        | -               | -          | -        | -          | - | C | T |
| PD7522a | Substitution | 4 | 117026317 | 117026317 | -        | -               | -          | -        | -          | - | A | C |
| PD7522a | Substitution | 4 | 120894498 | 120894498 | -        | -               | -          | -        | -          | - | C | T |
| PD7522a | Substitution | 4 | 122140590 | 122140590 | TNIP3    | ENST00000509841 | Intronic   | -        | -          | - | C | T |
| PD7522a | Substitution | 4 | 128898761 | 128898761 | C4orf29  | CCDS47131.1     | Intronic   | -        | -          | - | A | T |
| PD7522a | Substitution | 4 | 133635921 | 133635921 | -        | -               | -          | -        | -          | - | G | T |
| PD7522a | Substitution | 4 | 136028262 | 136028262 | -        | -               | -          | -        | -          | - | A | C |
| PD7522a | Substitution | 4 | 137551230 | 137551230 | -        | -               | -          | -        | -          | - | C | A |
| PD7522a | Substitution | 4 | 141156363 | 141156363 | -        | -               | -          | -        | -          | - | A | T |
| PD7522a | Substitution | 4 | 142237621 | 142237621 | -        | -               | -          | -        | -          | - | A | T |
| PD7522a | Substitution | 4 | 142713190 | 142713190 | -        | -               | -          | -        | -          | - | G | C |
| PD7522a | Substitution | 4 | 144883162 | 144883162 | -        | -               | -          | -        | -          | - | C | G |
| PD7522a | Substitution | 4 | 150678111 | 150678111 | -        | -               | -          | -        | -          | - | C | T |
| PD7522a | Substitution | 4 | 161563184 | 161563184 | -        | -               | -          | -        | -          | - | T | A |
| PD7522a | Substitution | 4 | 165000734 | 165000734 | MARCH1   | CCDS45732.1     | Intronic   | -        | -          | - | T | C |
| PD7522a | Substitution | 4 | 171423331 | 171423331 | -        | -               | -          | -        | -          | - | C | T |
| PD7522a | Substitution | 4 | 172514409 | 172514409 | -        | -               | -          | -        | -          | - | G | T |
| PD7522a | Substitution | 4 | 175606571 | 175606571 | GLRA3    | CCDS3822.1      | Intronic   | -        | -          | - | T | C |
| PD7522a | Substitution | 4 | 177216538 | 177216538 | -        | -               | -          | -        | -          | - | G | A |
| PD7522a | Indel        | 4 | 179954186 | 179954186 | -        | -               | -          | -        | -          | - | - | - |
| PD7522a | Substitution | 5 | 2366432   | 2366432   | -        | -               | -          | -        | -          | - | C | A |
| PD7522a | Substitution | 5 | 8180866   | 8180866   | -        | -               | -          | -        | -          | - | C | T |
| PD7522a | Substitution | 5 | 12102246  | 12102246  | -        | -               | -          | -        | -          | - | C | T |
| PD7522a | Substitution | 5 | 12767601  | 12767601  | -        | -               | -          | -        | -          | - | A | C |
| PD7522a | Substitution | 5 | 13544661  | 13544661  | -        | -               | -          | -        | -          | - | A | T |
| PD7522a | Substitution | 5 | 16168636  | 16168636  | MARCH11  | CCDS47192.1     | Intronic   | -        | -          | - | A | T |
| PD7522a | Substitution | 5 | 16634429  | 16634429  | -        | -               | -          | -        | -          | - | C | T |
| PD7522a | Substitution | 5 | 20428399  | 20428399  | CDH18    | CCDS3652.1      | Intronic   | -        | -          | - | G | A |
| PD7522a | Substitution | 5 | 21120855  | 21120855  | -        | -               | -          | -        | -          | - | G | T |
| PD7522a | Substitution | 5 | 21251438  | 21251438  | -        | -               | -          | -        | -          | - | G | A |
| PD7522a | Substitution | 5 | 21265675  | 21265675  | -        | -               | -          | -        | -          | - | A | C |
| PD7522a | Substitution | 5 | 26123472  | 26123472  | -        | -               | -          | -        | -          | - | C | T |
| PD7522a | Substitution | 5 | 27072647  | 27072647  | CDH9     | ENST00000513289 | Intronic   | -        | -          | - | A | G |
| PD7522a | Substitution | 5 | 27164929  | 27164929  | -        | -               | -          | -        | -          | - | T | A |
| PD7522a | Substitution | 5 | 29063330  | 29063330  | -        | -               | -          | -        | -          | - | G | A |
| PD7522a | Substitution | 5 | 37341057  | 37341057  | NUP155   | CCDS3921.1      | Intronic   | -        | -          | - | C | A |
| PD7522a | Substitution | 5 | 40366279  | 40366279  | -        | -               | -          | -        | -          | - | C | A |
| PD7522a | Substitution | 5 | 40458878  | 40458878  | -        | -               | -          | -        | -          | - | G | T |
| PD7522a | Substitution | 5 | 45906933  | 45906933  | -        | -               | -          | -        | -          | - | C | G |
| PD7522a | Substitution | 5 | 52202191  | 52202191  | ITGA1    | CCDS3955.1      | Intronic   | -        | -          | - | G | T |
| PD7522a | Substitution | 5 | 52316930  | 52316930  | ITGA2    | CCDS3957.1      | Intronic   | -        | -          | - | C | A |
| PD7522a | Substitution | 5 | 57591922  | 57591922  | -        | -               | -          | -        | -          | - | C | T |
| PD7522a | Indel        | 5 | 59246985  | 59246987  | -        | -               | -          | -        | -          | - | - | - |
| PD7522a | Substitution | 5 | 66748536  | 66748536  | -        | -               | -          | -        | -          | - | A | G |
| PD7522a | Substitution | 5 | 75899176  | 75899176  | IQGAP2   | CCDS34188.1     | Intronic   | -        | -          | - | T | C |
| PD7522a | Substitution | 5 | 80405750  | 80405750  | RASGRF2  | CCDS4052.1      | Intronic   | -        | -          | - | C | T |
| PD7522a | Substitution | 5 | 81437698  | 81437698  | ATG10    | CCDS4057.1      | Intronic   | -        | -          | - | G | A |
| PD7522a | Substitution | 5 | 86121502  | 86121502  | -        | -               | -          | -        | -          | - | A | T |
| PD7522a | Substitution | 5 | 90845383  | 90845383  | -        | -               | -          | -        | -          | - | C | A |
| PD7522a | Substitution | 5 | 91523508  | 91523508  | -        | -               | -          | -        | -          | - | G | T |
| PD7522a | Indel        | 5 | 95457676  | 95457679  | -        | -               | -          | -        | -          | - | - | - |
| PD7522a | Substitution | 5 | 104819620 | 104819620 | -        | -               | -          | -        | -          | - | T | A |
| PD7522a | Substitution | 5 | 111812367 | 111812367 | -        | -               | -          | -        | -          | - | A | G |
| PD7522a | Substitution | 5 | 113564692 | 113564692 | -        | -               | -          | -        | -          | - | C | T |
| PD7522a | Substitution | 5 | 113879568 | 113879568 | -        | -               | -          | -        | -          | - | A | C |
| PD7522a | Substitution | 5 | 114387462 | 114387462 | -        | -               | -          | -        | -          | - | A | T |
| PD7522a | Substitution | 5 | 114410834 | 114410834 | -        | -               | -          | -        | -          | - | A | T |
| PD7522a | Substitution | 5 | 116121883 | 116121883 | -        | -               | -          | -        | -          | - | G | A |
| PD7522a | Substitution | 5 | 135856617 | 135856617 | -        | -               | -          | -        | -          | - | G | A |
| PD7522a | Substitution | 5 | 136589926 | 136589926 | SPOCK1   | CCDS4191.1      | Intronic   | -        | -          | - | C | G |
| PD7522a | Substitution | 5 | 139239156 | 139239156 | NRG2     | CCDS47277.1     | Intronic   | -        | -          | - | G | A |
| PD7522a | Substitution | 5 | 147971525 | 147971525 | HTR4     | CCDS34272.1     | Intronic   | -        | -          | - | T | A |
| PD7522a | Substitution | 5 | 151739305 | 151739305 | -        | -               | -          | -        | -          | - | C | A |
| PD7522a | Substitution | 5 | 151868676 | 151868676 | -        | -               | -          | -        | -          | - | C | A |
| PD7522a | Substitution | 5 | 152442768 | 152442768 | -        | -               | -          | -        | -          | - | G | T |
| PD7522a | Substitution | 5 | 160334020 | 160334020 | -        | -               | -          | -        | -          | - | C | T |
| PD7522a | Substitution | 5 | 160533547 | 160533547 | -        | -               | -          | -        | -          | - | T | C |
| PD7522a | Substitution | 5 | 163101383 | 163101383 | -        | -               | -          | -        | -          | - | A | T |
| PD7522a | Substitution | 5 | 164179017 | 164179017 | -        | -               | -          | -        | -          | - | A | G |
| PD7522a | Substitution | 5 | 174432329 | 174432329 | -        | -               | -          | -        | -          | - | G | A |
| PD7522a | Substitution | 5 | 175284778 | 175284778 | CPLX2    | CCDS4396.1      | Intronic   | -        | -          | - | C | T |
| PD7522a | Indel        | 5 | 179018046 | 179018085 | -        | -               | -          | -        | -          | - | - | - |
| PD7522a | Substitution | 5 | 180585743 | 180585743 | -        | -               | -          | -        | -          | - | C | T |
| PD7522a | Substitution | 6 | 2889312   | 2889312   | SERPIN9  | CCDS4478.1      | Non-coding | r.2306>u | 3prime UTR | - | A | G |
| PD7522a | Substitution | 6 | 8800541   | 8800541   | -        | -               | -          | -        | -          | - | G | A |
| PD7522a | Substitution | 6 | 9219061   | 9219061   | -        | -               | -          | -        | -          | - | A | T |
| PD7522a | Substitution | 6 | 11352197  | 11352197  | NEDD9    | ENST00000504387 | Intronic   | -        | -          | - | A | C |
| PD7522a | Substitution | 6 | 12326065  | 12326065  | -        | -               | -          | -        | -          | - | T | G |
| PD7522a | Substitution | 6 | 32631958  | 32631958  | HLA-DQB1 | CCDS43451.1     | Intronic   | -        | -          | - | C | T |
| PD7522a | Substitution | 6 | 35741593  | 35741593  | -        | -               | -          | -        | -          | - | C | T |
| PD7522a | Substitution | 6 | 48240877  | 48240877  | -        | -               | -          | -        | -          | - | G | T |
| PD7522a | Substitution | 6 | 50308721  | 50308721  | -        | -               | -          | -        | -          | - | A | T |
| PD7522a | Substitution | 6 | 57267896  | 57267896  | PRIM2    | ENST00000389488 | Intronic   | -        | -          | - | G | A |
| PD7522a | Substitution | 6 | 63278782  | 63278782  | -        | -               | -          | -        | -          | - | A | G |
| PD7522a | Indel        | 6 | 68701907  | 68701907  | -        | -               | -          | -        | -          | - | - | - |
| PD7522a | Substitution | 6 | 68822235  | 68822235  | -        | -               | -          | -        | -          | - | G | T |
| PD7522a | Substitution | 6 | 81400274  | 81400274  | -        | -               | -          | -        | -          | - | T | C |
| PD7522a | Substitution | 6 | 92795581  | 92795581  | -        | -               | -          | -        | -          | - | G | T |
| PD7522a | Substitution | 6 | 103172230 | 103172230 | -        | -               | -          | -        | -          | - | A | G |
| PD7522a | Substitution | 6 | 110631006 | 110631006 | C6orf186 | CCDS43489.1     | Intronic   | -        | -          | - | C | T |
| PD7522a | Substitution | 6 | 117488986 | 117488986 | -        | -               | -          | -        | -          | - | C | A |
| PD7522a | Substitution | 6 | 121820362 | 121820362 | -        | -               | -          | -        | -          | - | C | T |
| PD7522a | Substitution | 6 | 123956649 | 123956649 | TRDN     | ENST00000334268 | Intronic   | -        | -          | - | T | A |

|         |              |    |           |           |                 |                 |           |         |        |   |   |   |
|---------|--------------|----|-----------|-----------|-----------------|-----------------|-----------|---------|--------|---|---|---|
| PD7522a | Substitution | 6  | 123994491 | 123994491 | -               | -               | -         | -       | -      | - | T | A |
| PD7522a | Substitution | 6  | 124869511 | 124869511 | NKAIN2          | CCDS34526.1     | Intronic  | -       | -      | - | T | A |
| PD7522a | Substitution | 6  | 125693843 | 125693843 | -               | -               | -         | -       | -      | - | G | T |
| PD7522a | Substitution | 6  | 134100521 | 134100521 | -               | -               | -         | -       | -      | - | G | A |
| PD7522a | Substitution | 6  | 135411092 | 135411092 | -               | -               | -         | -       | -      | - | C | A |
| PD7522a | Substitution | 6  | 141240822 | 141240822 | -               | -               | -         | -       | -      | - | C | T |
| PD7522a | Substitution | 6  | 146113542 | 146113542 | -               | -               | -         | -       | -      | - | T | A |
| PD7522a | Substitution | 6  | 169166943 | 169166943 | -               | -               | -         | -       | -      | - | C | A |
| PD7522a | Substitution | 7  | 4466517   | 4466517   | -               | -               | -         | -       | -      | - | C | A |
| PD7522a | Substitution | 7  | 9235026   | 9235026   | -               | -               | -         | -       | -      | - | T | G |
| PD7522a | Substitution | 7  | 9660714   | 9660714   | -               | -               | -         | -       | -      | - | C | T |
| PD7522a | Substitution | 7  | 12518178  | 12518178  | -               | -               | -         | -       | -      | - | G | A |
| PD7522a | Substitution | 7  | 14624186  | 14624186  | DGKB            | CCDS47547.1     | Intronic  | -       | -      | - | C | T |
| PD7522a | Substitution | 7  | 19362412  | 19362412  | -               | -               | -         | -       | -      | - | T | A |
| PD7522a | Substitution | 7  | 21203037  | 21203037  | -               | -               | -         | -       | -      | - | A | C |
| PD7522a | Substitution | 7  | 25017447  | 25017447  | OSBPL3          | CCDS5390.1      | Intronic  | -       | -      | - | C | T |
| PD7522a | Substitution | 7  | 26024683  | 26024683  | -               | -               | -         | -       | -      | - | A | C |
| PD7522a | Substitution | 7  | 29669999  | 29669999  | -               | -               | -         | -       | -      | - | T | C |
| PD7522a | Substitution | 7  | 31920905  | 31920905  | PDE1C           | CCDS5437.1      | Intronic  | -       | -      | - | C | T |
| PD7522a | Substitution | 7  | 39485564  | 39485564  | POU6F2          | CCDS34620.2     | Intronic  | -       | -      | - | T | A |
| PD7522a | Substitution | 7  | 44553999  | 44553999  | NPC1L1          | CCDS5491.1      | Intronic  | -       | -      | - | G | A |
| PD7522a | Substitution | 7  | 45375260  | 45375260  | -               | -               | -         | -       | -      | - | G | T |
| PD7522a | Substitution | 7  | 49995349  | 49995349  | ZPBP            | CCDS5509.1      | Intronic  | -       | -      | - | C | A |
| PD7522a | Indel        | 7  | 51974572  | 51974572  | -               | -               | -         | -       | -      | - | - | - |
| PD7522a | Substitution | 7  | 73077103  | 73077103  | -               | -               | -         | -       | -      | - | C | T |
| PD7522a | Substitution | 7  | 83508529  | 83508529  | -               | -               | -         | -       | -      | - | C | T |
| PD7522a | Substitution | 7  | 85201296  | 85201296  | -               | -               | -         | -       | -      | - | G | A |
| PD7522a | Substitution | 7  | 85476139  | 85476139  | -               | -               | -         | -       | -      | - | G | A |
| PD7522a | Substitution | 7  | 90822345  | 90822345  | CDK14           | CCDS5619.1      | Intronic  | -       | -      | - | G | C |
| PD7522a | Substitution | 7  | 93833736  | 93833736  | -               | -               | -         | -       | -      | - | C | T |
| PD7522a | Substitution | 7  | 94205137  | 94205137  | -               | -               | -         | -       | -      | - | G | T |
| PD7522a | Substitution | 7  | 100636091 | 100636091 | MUC12           | ENST00000379442 | c.2676T>A | p.T892T | Silent | - | T | A |
| PD7522a | Substitution | 7  | 103829482 | 103829482 | ORCSL           | CCDS5734.1      | Intronic  | -       | -      | - | A | T |
| PD7522a | Substitution | 7  | 109451573 | 109451573 | -               | -               | -         | -       | -      | - | C | G |
| PD7522a | Substitution | 7  | 118570176 | 118570176 | -               | -               | -         | -       | -      | - | T | A |
| PD7522a | Substitution | 7  | 121254958 | 121254958 | -               | -               | -         | -       | -      | - | A | G |
| PD7522a | Substitution | 7  | 137989248 | 137989248 | -               | -               | -         | -       | -      | - | G | T |
| PD7522a | Substitution | 7  | 146128499 | 146128499 | CNTNAP2         | CCDS5889.1      | Intronic  | -       | -      | - | T | A |
| PD7522a | Substitution | 7  | 146673344 | 146673344 | CNTNAP2         | CCDS5889.1      | Intronic  | -       | -      | - | C | G |
| PD7522a | Substitution | 8  | 3368992   | 3368992   | CSMD1           | ENST00000318252 | Intronic  | -       | -      | - | G | A |
| PD7522a | Substitution | 8  | 3423850   | 3423850   | CSMD1           | ENST00000318252 | Intronic  | -       | -      | - | C | T |
| PD7522a | Substitution | 8  | 5085512   | 5085512   | -               | -               | -         | -       | -      | - | C | A |
| PD7522a | Substitution | 8  | 11881684  | 11881684  | -               | -               | -         | -       | -      | - | A | G |
| PD7522a | Substitution | 8  | 21236953  | 21236953  | -               | -               | -         | -       | -      | - | T | A |
| PD7522a | Substitution | 8  | 27833825  | 27833825  | SCARA5          | CCDS6064.1      | Intronic  | -       | -      | - | G | A |
| PD7522a | Substitution | 8  | 29935838  | 29935838  | TMEM66          | CCDS6074.1      | Intronic  | -       | -      | - | C | T |
| PD7522a | Substitution | 8  | 31669847  | 31669847  | NRG1            | CCDS47836.1     | Intronic  | -       | -      | - | G | A |
| PD7522a | Substitution | 8  | 34556582  | 34556582  | -               | -               | -         | -       | -      | - | T | A |
| PD7522a | Substitution | 8  | 50849042  | 50849042  | -               | -               | -         | -       | -      | - | G | T |
| PD7522a | Substitution | 8  | 52012134  | 52012134  | -               | -               | -         | -       | -      | - | G | A |
| PD7522a | Substitution | 8  | 53823625  | 53823625  | -               | -               | -         | -       | -      | - | A | C |
| PD7522a | Substitution | 8  | 54272542  | 54272542  | -               | -               | -         | -       | -      | - | T | C |
| PD7522a | Substitution | 8  | 55287072  | 55287072  | -               | -               | -         | -       | -      | - | A | G |
| PD7522a | Substitution | 8  | 60156302  | 60156302  | -               | -               | -         | -       | -      | - | A | C |
| PD7522a | Substitution | 8  | 64532078  | 64532078  | -               | -               | -         | -       | -      | - | T | G |
| PD7522a | Substitution | 8  | 65787675  | 65787675  | -               | -               | -         | -       | -      | - | T | C |
| PD7522a | Substitution | 8  | 65926957  | 65926957  | -               | -               | -         | -       | -      | - | G | A |
| PD7522a | Substitution | 8  | 80036560  | 80036560  | -               | -               | -         | -       | -      | - | C | A |
| PD7522a | Substitution | 8  | 80667086  | 80667086  | -               | -               | -         | -       | -      | - | G | T |
| PD7522a | Substitution | 8  | 82372517  | 82372517  | FABP9           | CCDS34914.1     | Intronic  | -       | -      | - | G | T |
| PD7522a | Substitution | 8  | 82812224  | 82812224  | -               | -               | -         | -       | -      | - | G | A |
| PD7522a | Substitution | 8  | 84673546  | 84673546  | -               | -               | -         | -       | -      | - | G | C |
| PD7522a | Substitution | 8  | 87850964  | 87850964  | -               | -               | -         | -       | -      | - | G | A |
| PD7522a | Substitution | 8  | 107367211 | 107367211 | OXR1            | CCDS47909.1     | Intronic  | -       | -      | - | A | G |
| PD7522a | Substitution | 8  | 111407873 | 111407873 | -               | -               | -         | -       | -      | - | C | A |
| PD7522a | Substitution | 8  | 111502546 | 111502546 | -               | -               | -         | -       | -      | - | C | A |
| PD7522a | Substitution | 8  | 111515074 | 111515074 | -               | -               | -         | -       | -      | - | G | C |
| PD7522a | Substitution | 8  | 112021277 | 112021277 | -               | -               | -         | -       | -      | - | G | C |
| PD7522a | Substitution | 8  | 112963320 | 112963320 | -               | -               | -         | -       | -      | - | T | C |
| PD7522a | Substitution | 8  | 118167386 | 118167386 | SLC30A8         | CCDS6322.1      | Intronic  | -       | -      | - | G | T |
| PD7522a | Substitution | 8  | 130820608 | 130820608 | -               | -               | -         | -       | -      | - | T | A |
| PD7522a | Substitution | 8  | 135871527 | 135871527 | AC103764.1      | ENST00000505083 | Intronic  | -       | -      | - | C | T |
| PD7522a | Substitution | 8  | 139558292 | 139558292 | -               | -               | -         | -       | -      | - | G | A |
| PD7522a | Substitution | 8  | 144229035 | 144229035 | -               | -               | -         | -       | -      | - | C | A |
| PD7522a | Substitution | 9  | 9444011   | 9444011   | PTPRD           | CCDS43786.1     | Intronic  | -       | -      | - | T | A |
| PD7522a | Substitution | 9  | 10358936  | 10358936  | PTPRD           | CCDS43786.1     | Intronic  | -       | -      | - | G | T |
| PD7522a | Substitution | 9  | 24408829  | 24408829  | -               | -               | -         | -       | -      | - | C | A |
| PD7522a | Substitution | 9  | 24424151  | 24424151  | -               | -               | -         | -       | -      | - | C | A |
| PD7522a | Substitution | 9  | 25615980  | 25615980  | -               | -               | -         | -       | -      | - | G | T |
| PD7522a | Substitution | 9  | 28286952  | 28286952  | LINGO2          | CCDS6524.1      | Intronic  | -       | -      | - | C | A |
| PD7522a | Substitution | 9  | 29748946  | 29748946  | -               | -               | -         | -       | -      | - | A | T |
| PD7522a | Substitution | 9  | 30756396  | 30756396  | -               | -               | -         | -       | -      | - | C | A |
| PD7522a | Substitution | 9  | 30810608  | 30810608  | -               | -               | -         | -       | -      | - | C | A |
| PD7522a | Substitution | 9  | 30850557  | 30850557  | -               | -               | -         | -       | -      | - | G | A |
| PD7522a | Substitution | 9  | 34213545  | 34213545  | UBAP1           | CCDS6550.1      | Intronic  | -       | -      | - | C | T |
| PD7522a | Substitution | 9  | 37631800  | 37631800  | -               | -               | -         | -       | -      | - | T | C |
| PD7522a | Substitution | 9  | 74152220  | 74152220  | -               | -               | -         | -       | -      | - | C | A |
| PD7522a | Substitution | 9  | 76262140  | 76262140  | -               | -               | -         | -       | -      | - | C | T |
| PD7522a | Substitution | 9  | 89375041  | 89375041  | -               | -               | -         | -       | -      | - | A | T |
| PD7522a | Substitution | 9  | 90943489  | 90943489  | -               | -               | -         | -       | -      | - | A | G |
| PD7522a | Substitution | 9  | 100294176 | 100294176 | TMOD1           | CCDS6726.1      | Intronic  | -       | -      | - | G | A |
| PD7522a | Substitution | 9  | 103832015 | 103832015 | ENSG00000148123 | CCDS6751.1      | Intronic  | -       | -      | - | C | A |
| PD7522a | Substitution | 9  | 105099639 | 105099639 | -               | -               | -         | -       | -      | - | C | T |
| PD7522a | Substitution | 9  | 107293529 | 107293529 | -               | -               | -         | -       | -      | - | C | T |
| PD7522a | Substitution | 9  | 110710434 | 110710434 | -               | -               | -         | -       | -      | - | G | A |
| PD7522a | Substitution | 9  | 113625127 | 113625127 | -               | -               | -         | -       | -      | - | A | C |
| PD7522a | Substitution | 9  | 117514739 | 117514739 | -               | -               | -         | -       | -      | - | A | T |
| PD7522a | Substitution | 9  | 118541558 | 118541558 | -               | -               | -         | -       | -      | - | A | C |
| PD7522a | Substitution | 9  | 120656607 | 120656607 | -               | -               | -         | -       | -      | - | T | A |
| PD7522a | Substitution | 9  | 127123849 | 127123849 | PSMB7           | CCDS6855.1      | Intronic  | -       | -      | - | C | A |
| PD7522a | Substitution | 9  | 134210489 | 134210489 | -               | -               | -         | -       | -      | - | G | T |
| PD7522a | Substitution | 10 | 592908    | 592908    | DIP2C           | CCDS7054.1      | Intronic  | -       | -      | - | C | A |
| PD7522a | Substitution | 10 | 8025671   | 8025671   | TAF3            | CCDS41487.1     | Intronic  | -       | -      | - | G | A |
| PD7522a | Substitution | 10 | 8144814   | 8144814   | -               | -               | -         | -       | -      | - | A | T |
| PD7522a | Substitution | 10 | 16758658  | 16758658  | RSU1            | CCDS7112.1      | Intronic  | -       | -      | - | C | A |
| PD7522a | Substitution | 10 | 24682227  | 24682227  | KIAA1217        | CCDS31165.1     | Intronic  | -       | -      | - | C | T |
| PD7522a | Substitution | 10 | 28280355  | 28280355  | ARMC4           | CCDS7157.1      | Intronic  | -       | -      | - | G | T |
| PD7522a | Substitution | 10 | 37721730  | 37721730  | -               | -               | -         | -       | -      | - | A | T |
| PD7522a | Substitution | 10 | 47082337  | 47082337  | -               | -               | -         | -       | -      | - | G | A |
| PD7522a | Substitution | 10 | 54129855  | 54129855  | -               | -               | -         | -       | -      | - | C | A |
| PD7522a | Substitution | 10 | 54883114  | 54883114  | -               | -               | -         | -       | -      | - | G | A |

|         |              |    |           |           |                 |                 |            |          |            |   |   |
|---------|--------------|----|-----------|-----------|-----------------|-----------------|------------|----------|------------|---|---|
| PD7522a | Substitution | 10 | 56341493  | 56341493  | PCDH15          | CCDS44404.1     | Intronic   | -        | -          | C | T |
| PD7522a | Substitution | 10 | 57475692  | 57475692  | -               | -               | -          | -        | -          | A | G |
| PD7522a | Substitution | 10 | 60093896  | 60093896  | -               | -               | -          | -        | -          | T | A |
| PD7522a | Substitution | 10 | 65512185  | 65512185  | -               | -               | -          | -        | -          | T | A |
| PD7522a | Substitution | 10 | 65958691  | 65958691  | -               | -               | -          | -        | -          | A | T |
| PD7522a | Substitution | 10 | 67046140  | 67046140  | -               | -               | -          | -        | -          | T | A |
| PD7522a | Substitution | 10 | 68607885  | 68607885  | CTNNA3          | CCDS7269.1      | Intronic   | -        | -          | A | T |
| PD7522a | Substitution | 10 | 89729654  | 89729654  | PTEN            | ENST00000371953 | Non-coding | r.6994>c | 3prime UTR | T | C |
| PD7522a | Substitution | 10 | 90575266  | 90575266  | LIPM            | CCDS44457.1     | c.858+6T>A | p.?      | Splice     | T | A |
| PD7522a | Substitution | 10 | 99853893  | 99853893  | -               | -               | -          | -        | -          | A | G |
| PD7522a | Substitution | 10 | 108877910 | 108877910 | SORCS1          | CCDS7559.1      | Intronic   | -        | -          | G | A |
| PD7522a | Indel        | 10 | 110573174 | 110573177 | -               | -               | -          | -        | -          | - | - |
| PD7522a | Substitution | 10 | 117187060 | 117187060 | ATRNL1          | CCDS7592.1      | Intronic   | -        | -          | T | A |
| PD7522a | Substitution | 10 | 117629815 | 117629815 | ATRNL1          | CCDS7592.1      | Intronic   | -        | -          | C | T |
| PD7522a | Substitution | 10 | 118158247 | 118158247 | -               | -               | -          | -        | -          | T | C |
| PD7522a | Indel        | 10 | 123935198 | 123935199 | -               | -               | -          | -        | -          | - | - |
| PD7522a | Substitution | 10 | 133224344 | 133224344 | -               | -               | -          | -        | -          | G | A |
| PD7522a | Substitution | 11 | 1760892   | 1760892   | ENSG00000244242 | ENST00000382123 | Intronic   | -        | -          | A | T |
| PD7522a | Substitution | 11 | 7803182   | 7803182   | -               | -               | -          | -        | -          | C | A |
| PD7522a | Substitution | 11 | 21795446  | 21795446  | -               | -               | -          | -        | -          | T | A |
| PD7522a | Substitution | 11 | 24057388  | 24057388  | -               | -               | -          | -        | -          | G | A |
| PD7522a | Substitution | 11 | 30976927  | 30976927  | ENSG00000226746 | ENST00000399333 | Intronic   | -        | -          | A | T |
| PD7522a | Substitution | 11 | 37411017  | 37411017  | -               | -               | -          | -        | -          | C | T |
| PD7522a | Substitution | 11 | 37753096  | 37753096  | -               | -               | -          | -        | -          | G | A |
| PD7522a | Substitution | 11 | 38805322  | 38805322  | -               | -               | -          | -        | -          | C | T |
| PD7522a | Substitution | 11 | 42919585  | 42919585  | -               | -               | -          | -        | -          | C | T |
| PD7522a | Substitution | 11 | 42996247  | 42996247  | -               | -               | -          | -        | -          | G | A |
| PD7522a | Substitution | 11 | 45314133  | 45314133  | -               | -               | -          | -        | -          | G | A |
| PD7522a | Substitution | 11 | 49888117  | 49888117  | -               | -               | -          | -        | -          | C | T |
| PD7522a | Substitution | 11 | 49889380  | 49889380  | -               | -               | -          | -        | -          | T | A |
| PD7522a | Substitution | 11 | 56450817  | 56450817  | -               | -               | -          | -        | -          | A | T |
| PD7522a | Substitution | 11 | 69314756  | 69314756  | -               | -               | -          | -        | -          | C | T |
| PD7522a | Substitution | 11 | 80369910  | 80369910  | -               | -               | -          | -        | -          | C | T |
| PD7522a | Substitution | 11 | 88747488  | 88747488  | GRM5            | CCDS44694.1     | Intronic   | -        | -          | G | A |
| PD7522a | Substitution | 11 | 89322666  | 89322666  | -               | -               | -          | -        | -          | A | T |
| PD7522a | Substitution | 11 | 96965070  | 96965070  | -               | -               | -          | -        | -          | C | T |
| PD7522a | Substitution | 11 | 99993807  | 99993807  | CNTN5           | ENST00000279463 | Intronic   | -        | -          | A | T |
| PD7522a | Substitution | 11 | 101687956 | 101687956 | -               | -               | -          | -        | -          | C | T |
| PD7522a | Substitution | 11 | 103551556 | 103551556 | -               | -               | -          | -        | -          | G | T |
| PD7522a | Substitution | 11 | 105574844 | 105574844 | GRIA4           | CCDS41706.1     | Intronic   | -        | -          | T | C |
| PD7522a | Substitution | 11 | 109906842 | 109906842 | -               | -               | -          | -        | -          | C | T |
| PD7522a | Substitution | 11 | 112346443 | 112346443 | -               | -               | -          | -        | -          | C | A |
| PD7522a | Substitution | 11 | 115403635 | 115403635 | -               | -               | -          | -        | -          | C | G |
| PD7522a | Substitution | 11 | 115986959 | 115986959 | -               | -               | -          | -        | -          | C | G |
| PD7522a | Substitution | 11 | 115986963 | 115986963 | -               | -               | -          | -        | -          | T | G |
| PD7522a | Substitution | 11 | 117901712 | 117901712 | -               | -               | -          | -        | -          | A | G |
| PD7522a | Substitution | 11 | 124276066 | 124276066 | -               | -               | -          | -        | -          | C | A |
| PD7522a | Substitution | 11 | 127139495 | 127139495 | -               | -               | -          | -        | -          | G | A |
| PD7522a | Substitution | 11 | 127862582 | 127862582 | -               | -               | -          | -        | -          | G | T |
| PD7522a | Substitution | 11 | 130295652 | 130295652 | ADAMTS8         | CCDS41732.1     | Intronic   | -        | -          | C | T |
| PD7522a | Substitution | 11 | 131353421 | 131353421 | OPCML           | CCDS41733.1     | Intronic   | -        | -          | A | G |
| PD7522a | Substitution | 12 | 582566    | 582566    | B4GALNT3        | CCDS8504.1      | Intronic   | -        | -          | C | G |
| PD7522a | Substitution | 12 | 3767972   | 3767972   | EFCAB4B         | CCDS44803.1     | Intronic   | -        | -          | A | G |
| PD7522a | Substitution | 12 | 9296337   | 9296337   | -               | -               | -          | -        | -          | G | A |
| PD7522a | Substitution | 12 | 16253018  | 16253018  | -               | -               | -          | -        | -          | C | A |
| PD7522a | Substitution | 12 | 17615327  | 17615327  | -               | -               | -          | -        | -          | C | A |
| PD7522a | Substitution | 12 | 21025121  | 21025121  | SLCO1B3         | CCDS8684.1      | Intronic   | -        | -          | T | A |
| PD7522a | Substitution | 12 | 29065054  | 29065054  | -               | -               | -          | -        | -          | G | A |
| PD7522a | Substitution | 12 | 37908386  | 37908386  | -               | -               | -          | -        | -          | T | A |
| PD7522a | Substitution | 12 | 39342014  | 39342014  | -               | -               | -          | -        | -          | A | T |
| PD7522a | Substitution | 12 | 46111426  | 46111426  | -               | -               | -          | -        | -          | T | A |
| PD7522a | Substitution | 12 | 47869634  | 47869634  | -               | -               | -          | -        | -          | C | T |
| PD7522a | Substitution | 12 | 48699469  | 48699469  | -               | -               | -          | -        | -          | G | T |
| PD7522a | Substitution | 12 | 49907109  | 49907109  | SPATS2          | CCDS31794.1     | Intronic   | -        | -          | C | T |
| PD7522a | Substitution | 12 | 58677902  | 58677902  | -               | -               | -          | -        | -          | C | T |
| PD7522a | Substitution | 12 | 69430477  | 69430477  | -               | -               | -          | -        | -          | G | A |
| PD7522a | Substitution | 12 | 72627407  | 72627407  | -               | -               | -          | -        | -          | G | A |
| PD7522a | Substitution | 12 | 73969396  | 73969396  | -               | -               | -          | -        | -          | T | A |
| PD7522a | Substitution | 12 | 76817471  | 76817471  | OSBPL8          | CCDS31862.1     | Intronic   | -        | -          | C | T |
| PD7522a | Substitution | 12 | 79706407  | 79706407  | SYT1            | CCDS9017.1      | Intronic   | -        | -          | C | T |
| PD7522a | Substitution | 12 | 82541058  | 82541058  | -               | -               | -          | -        | -          | C | G |
| PD7522a | Substitution | 12 | 82874804  | 82874804  | -               | -               | -          | -        | -          | G | A |
| PD7522a | Substitution | 12 | 83696729  | 83696729  | -               | -               | -          | -        | -          | T | G |
| PD7522a | Indel        | 12 | 84962346  | 84962347  | -               | -               | -          | -        | -          | - | - |
| PD7522a | Substitution | 12 | 88880377  | 88880377  | -               | -               | -          | -        | -          | T | A |
| PD7522a | Substitution | 12 | 91933767  | 91933767  | -               | -               | -          | -        | -          | G | A |
| PD7522a | Substitution | 12 | 115818645 | 115818645 | -               | -               | -          | -        | -          | G | T |
| PD7522a | Substitution | 12 | 118560138 | 118560138 | -               | -               | -          | -        | -          | C | T |
| PD7522a | Substitution | 12 | 119253138 | 119253138 | -               | -               | -          | -        | -          | G | A |
| PD7522a | Substitution | 12 | 127897336 | 127897336 | -               | -               | -          | -        | -          | A | T |
| PD7522a | Substitution | 12 | 128928880 | 128928880 | TMEM132C        | CCDS45009.1     | Intronic   | -        | -          | C | T |
| PD7522a | Substitution | 12 | 129584270 | 129584270 | TMEM132D        | CCDS9266.1      | Intronic   | -        | -          | G | A |
| PD7522a | Substitution | 12 | 131382654 | 131382654 | -               | -               | -          | -        | -          | G | A |
| PD7522a | Substitution | 12 | 132322653 | 132322653 | -               | -               | -          | -        | -          | C | T |
| PD7522a | Substitution | 13 | 28271597  | 28271597  | MMP17           | CCDS31927.1     | Intronic   | -        | -          | A | T |
| PD7522a | Substitution | 13 | 29217330  | 29217330  | -               | -               | -          | -        | -          | G | T |
| PD7522a | Substitution | 13 | 42094774  | 42094774  | -               | -               | -          | -        | -          | G | C |
| PD7522a | Substitution | 13 | 42292272  | 42292272  | KIAA0564        | CCDS41881.1     | Intronic   | -        | -          | A | C |
| PD7522a | Substitution | 13 | 46045978  | 46045978  | COG3            | CCDS9398.1      | Intronic   | -        | -          | C | T |
| PD7522a | Substitution | 13 | 46884935  | 46884935  | -               | -               | -          | -        | -          | A | T |
| PD7522a | Substitution | 13 | 50372425  | 50372425  | -               | -               | -          | -        | -          | G | A |
| PD7522a | Substitution | 13 | 52145997  | 52145997  | -               | -               | -          | -        | -          | G | A |
| PD7522a | Substitution | 13 | 55865846  | 55865846  | -               | -               | -          | -        | -          | C | G |
| PD7522a | Substitution | 13 | 57674633  | 57674633  | -               | -               | -          | -        | -          | C | A |
| PD7522a | Substitution | 13 | 64958812  | 64958812  | -               | -               | -          | -        | -          | G | T |
| PD7522a | Substitution | 13 | 65218802  | 65218802  | -               | -               | -          | -        | -          | A | C |
| PD7522a | Substitution | 13 | 66640670  | 66640670  | -               | -               | -          | -        | -          | A | T |
| PD7522a | Substitution | 13 | 70418007  | 70418007  | KLHL1           | CCDS9445.1      | Intronic   | -        | -          | C | A |
| PD7522a | Substitution | 13 | 71497974  | 71497974  | -               | -               | -          | -        | -          | G | T |
| PD7522a | Substitution | 13 | 72018509  | 72018509  | DACH1           | ENST00000305425 | Intronic   | -        | -          | A | G |
| PD7522a | Substitution | 13 | 72445433  | 72445433  | -               | -               | -          | -        | -          | G | A |
| PD7522a | Substitution | 13 | 72912737  | 72912737  | -               | -               | -          | -        | -          | C | A |
| PD7522a | Substitution | 13 | 77307403  | 77307403  | -               | -               | -          | -        | -          | C | T |
| PD7522a | Substitution | 13 | 80173648  | 80173648  | -               | -               | -          | -        | -          | C | T |
| PD7522a | Substitution | 13 | 81675895  | 81675895  | -               | -               | -          | -        | -          | A | T |
| PD7522a | Substitution | 13 | 88776159  | 88776159  | -               | -               | -          | -        | -          | C | T |
| PD7522a | Substitution | 13 | 90122549  | 90122549  | -               | -               | -          | -        | -          | A | T |
| PD7522a | Substitution | 13 | 90267065  | 90267065  | -               | -               | -          | -        | -          | T | A |
| PD7522a | Substitution | 13 | 102949335 | 102949335 | FGF14           | CCDS9500.1      | Intronic   | -        | -          | A | T |
| PD7522a | Substitution | 13 | 104647936 | 104647936 | -               | -               | -          | -        | -          | C | G |
| PD7522a | Substitution | 13 | 104991649 | 104991649 | -               | -               | -          | -        | -          | C | T |





|         |              |   |           |           |                 |                 |          |   |   |   |   |
|---------|--------------|---|-----------|-----------|-----------------|-----------------|----------|---|---|---|---|
| PD7523a | Substitution | 2 | 61131410  | 61131410  | REL             | CCDS1864.1      | Intronic | - | - | G | C |
| PD7523a | Substitution | 2 | 62506396  | 62506396  | AC107081.2      | ENST00000506268 | Intronic | - | - | G | A |
| PD7523a | Substitution | 2 | 66998829  | 66998829  | -               | -               | -        | - | - | C | T |
| PD7523a | Substitution | 2 | 79865285  | 79865285  | CTNNA2          | CCDS42703.2     | Intronic | - | - | T | G |
| PD7523a | Substitution | 2 | 84435490  | 84435490  | -               | -               | -        | - | - | A | G |
| PD7523a | Indel        | 2 | 92293241  | 92293242  | -               | -               | -        | - | - | - | - |
| PD7523a | Substitution | 2 | 96580463  | 96580463  | ENSG00000174501 | ENST00000456556 | Intronic | - | - | C | A |
| PD7523a | Substitution | 2 | 100114129 | 100114129 | -               | -               | -        | - | - | G | A |
| PD7523a | Substitution | 2 | 101336130 | 101336130 | -               | -               | -        | - | - | C | G |
| PD7523a | Substitution | 2 | 105165910 | 105165910 | -               | -               | -        | - | - | C | A |
| PD7523a | Substitution | 2 | 108556331 | 108556331 | -               | -               | -        | - | - | G | T |
| PD7523a | Substitution | 2 | 115144283 | 115144283 | -               | -               | -        | - | - | A | T |
| PD7523a | Substitution | 2 | 118288533 | 118288533 | -               | -               | -        | - | - | C | T |
| PD7523a | Substitution | 2 | 118322484 | 118322484 | -               | -               | -        | - | - | C | A |
| PD7523a | Substitution | 2 | 119031715 | 119031715 | -               | -               | -        | - | - | C | T |
| PD7523a | Substitution | 2 | 123312351 | 123312351 | -               | -               | -        | - | - | C | G |
| PD7523a | Substitution | 2 | 124093448 | 124093448 | -               | -               | -        | - | - | G | T |
| PD7523a | Substitution | 2 | 124226591 | 124226591 | -               | -               | -        | - | - | T | C |
| PD7523a | Substitution | 2 | 125418728 | 125418728 | CNTNAP5         | CCDS46401.1     | Intronic | - | - | A | C |
| PD7523a | Substitution | 2 | 127421424 | 127421424 | GYPC            | CCDS2136.1      | Intronic | - | - | C | T |
| PD7523a | Substitution | 2 | 131708865 | 131708865 | ARHGFE4         | CCDS42754.1     | Intronic | - | - | G | T |
| PD7523a | Substitution | 2 | 132397051 | 132397051 | -               | -               | -        | - | - | A | G |
| PD7523a | Substitution | 2 | 133712679 | 133712679 | NCKAP5          | CCDS46418.1     | Intronic | - | - | G | A |
| PD7523a | Substitution | 2 | 142512906 | 142512906 | LRP1B           | CCDS2182.1      | Intronic | - | - | T | G |
| PD7523a | Substitution | 2 | 142816414 | 142816414 | LRP1B           | CCDS2182.1      | Intronic | - | - | A | G |
| PD7523a | Substitution | 2 | 145120370 | 145120370 | -               | -               | -        | - | - | C | T |
| PD7523a | Substitution | 2 | 145957966 | 145957966 | -               | -               | -        | - | - | G | A |
| PD7523a | Substitution | 2 | 155478899 | 155478899 | -               | -               | -        | - | - | A | G |
| PD7523a | Substitution | 2 | 161549758 | 161549758 | -               | -               | -        | - | - | C | G |
| PD7523a | Substitution | 2 | 162122289 | 162122289 | -               | -               | -        | - | - | C | T |
| PD7523a | Substitution | 2 | 170418695 | 170418695 | FASTKD1         | CCDS33318.1     | Intronic | - | - | G | T |
| PD7523a | Substitution | 2 | 171342876 | 171342876 | MYO3B           | CCDS42773.1     | Intronic | - | - | G | A |
| PD7523a | Substitution | 2 | 172644248 | 172644248 | SLC25A12        | CCDS33327.1     | Intronic | - | - | G | A |
| PD7523a | Substitution | 2 | 181108494 | 181108494 | -               | -               | -        | - | - | G | C |
| PD7523a | Substitution | 2 | 185756548 | 185756548 | ZNF804A         | CCDS2291.1      | Intronic | - | - | C | T |
| PD7523a | Substitution | 2 | 187489529 | 187489529 | ITGAV           | CCDS2292.1      | Intronic | - | - | C | T |
| PD7523a | Substitution | 2 | 189516306 | 189516306 | -               | -               | -        | - | - | G | T |
| PD7523a | Substitution | 2 | 190803278 | 190803278 | -               | -               | -        | - | - | G | A |
| PD7523a | Substitution | 2 | 195246153 | 195246153 | -               | -               | -        | - | - | T | G |
| PD7523a | Substitution | 2 | 195354351 | 195354351 | -               | -               | -        | - | - | A | C |
| PD7523a | Substitution | 2 | 195955309 | 195955309 | -               | -               | -        | - | - | G | C |
| PD7523a | Substitution | 2 | 199737457 | 199737457 | -               | -               | -        | - | - | A | G |
| PD7523a | Substitution | 2 | 205035049 | 205035049 | -               | -               | -        | - | - | C | T |
| PD7523a | Substitution | 2 | 223481523 | 223481523 | FARSB           | CCDS2454.1      | Intronic | - | - | A | T |
| PD7523a | Substitution | 2 | 225253547 | 225253547 | FAM124B         | CCDS2461.1      | Intronic | - | - | A | G |
| PD7523a | Substitution | 2 | 229309362 | 229309362 | -               | -               | -        | - | - | G | A |
| PD7523a | Substitution | 2 | 229539435 | 229539435 | -               | -               | -        | - | - | C | A |
| PD7523a | Substitution | 2 | 23298152  | 23298152  | -               | -               | -        | - | - | C | T |
| PD7523a | Substitution | 2 | 235974108 | 235974108 | -               | -               | -        | - | - | C | A |
| PD7523a | Substitution | 2 | 239228490 | 239228490 | -               | -               | -        | - | - | C | T |
| PD7523a | Substitution | 2 | 240966946 | 240966946 | -               | -               | -        | - | - | C | T |
| PD7523a | Substitution | 3 | 1772928   | 1772928   | -               | -               | -        | - | - | T | A |
| PD7523a | Substitution | 3 | 15055619  | 15055619  | NR2C2           | CCDS2621.1      | Intronic | - | - | T | C |
| PD7523a | Substitution | 3 | 40780279  | 40780279  | -               | -               | -        | - | - | C | T |
| PD7523a | Substitution | 3 | 54704714  | 54704714  | CACNA2D3        | ENST00000474759 | Intronic | - | - | C | T |
| PD7523a | Substitution | 3 | 67776291  | 67776291  | -               | -               | -        | - | - | A | T |
| PD7523a | Substitution | 3 | 68662930  | 68662930  | -               | -               | -        | - | - | C | T |
| PD7523a | Substitution | 3 | 70813358  | 70813358  | -               | -               | -        | - | - | T | A |
| PD7523a | Substitution | 3 | 70813359  | 70813359  | -               | -               | -        | - | - | A | C |
| PD7523a | Substitution | 3 | 73554728  | 73554728  | PDZRN3          | CCDS33789.1     | Intronic | - | - | A | G |
| PD7523a | Substitution | 3 | 75173495  | 75173495  | -               | -               | -        | - | - | C | A |
| PD7523a | Substitution | 3 | 76221059  | 76221059  | ROBO2           | ENST00000487694 | Intronic | - | - | A | G |
| PD7523a | Substitution | 3 | 77810997  | 77810997  | -               | -               | -        | - | - | T | C |
| PD7523a | Substitution | 3 | 82432770  | 82432770  | -               | -               | -        | - | - | A | T |
| PD7523a | Substitution | 3 | 82686466  | 82686466  | -               | -               | -        | - | - | A | T |
| PD7523a | Substitution | 3 | 85100613  | 85100613  | CADM2           | ENST00000383699 | Intronic | - | - | A | G |
| PD7523a | Substitution | 3 | 85591345  | 85591345  | CADM2           | ENST00000383699 | Intronic | - | - | A | G |
| PD7523a | Substitution | 3 | 90364353  | 90364353  | -               | -               | -        | - | - | A | T |
| PD7523a | Substitution | 3 | 94388870  | 94388870  | -               | -               | -        | - | - | A | G |
| PD7523a | Substitution | 3 | 113433595 | 113433595 | -               | -               | -        | - | - | A | G |
| PD7523a | Substitution | 3 | 115997101 | 115997101 | LSAMP           | CCDS2982.1      | Intronic | - | - | C | T |
| PD7523a | Substitution | 3 | 128224419 | 128224419 | -               | -               | -        | - | - | G | A |
| PD7523a | Substitution | 3 | 134712098 | 134712098 | EPHB1           | CCDS46921.1     | Intronic | - | - | C | A |
| PD7523a | Substitution | 3 | 138673191 | 138673191 | -               | -               | -        | - | - | C | T |
| PD7523a | Substitution | 3 | 140180350 | 140180350 | CLSTN2          | CCDS3112.1      | Intronic | - | - | G | T |
| PD7523a | Indel        | 3 | 143541397 | 143541397 | -               | -               | -        | - | - | - | - |
| PD7523a | Substitution | 3 | 143826521 | 143826521 | -               | -               | -        | - | - | A | G |
| PD7523a | Substitution | 3 | 144308352 | 144308352 | -               | -               | -        | - | - | A | T |
| PD7523a | Substitution | 3 | 160967553 | 160967553 | NMD3            | CCDS3194.1      | Intronic | - | - | A | T |
| PD7523a | Substitution | 3 | 161520069 | 161520069 | -               | -               | -        | - | - | A | T |
| PD7523a | Substitution | 3 | 164159620 | 164159620 | -               | -               | -        | - | - | C | A |
| PD7523a | Substitution | 3 | 164433240 | 164433240 | -               | -               | -        | - | - | A | T |
| PD7523a | Substitution | 3 | 165921074 | 165921074 | -               | -               | -        | - | - | G | T |
| PD7523a | Substitution | 3 | 173497315 | 173497315 | NLGN1           | CCDS3222.1      | Intronic | - | - | A | G |
| PD7523a | Substitution | 3 | 175236154 | 175236154 | NAALADL2        | CCDS46960.1     | Intronic | - | - | T | A |
| PD7523a | Indel        | 3 | 178001350 | 178001353 | -               | -               | -        | - | - | - | - |
| PD7523a | Substitution | 3 | 180014643 | 180014643 | -               | -               | -        | - | - | A | T |
| PD7523a | Substitution | 3 | 181596343 | 181596343 | -               | -               | -        | - | - | G | T |
| PD7523a | Substitution | 3 | 183329793 | 183329793 | -               | -               | -        | - | - | G | C |
| PD7523a | Substitution | 4 | 9522854   | 9522854   | -               | -               | -        | - | - | T | C |
| PD7523a | Substitution | 4 | 9653776   | 9653776   | -               | -               | -        | - | - | G | C |
| PD7523a | Indel        | 4 | 16942768  | 16942771  | -               | -               | -        | - | - | - | - |
| PD7523a | Substitution | 4 | 18894882  | 18894882  | -               | -               | -        | - | - | T | A |
| PD7523a | Substitution | 4 | 19732410  | 19732410  | -               | -               | -        | - | - | A | T |
| PD7523a | Substitution | 4 | 36759402  | 36759402  | -               | -               | -        | - | - | T | A |
| PD7523a | Substitution | 4 | 40029732  | 40029732  | -               | -               | -        | - | - | G | C |
| PD7523a | Substitution | 4 | 41859473  | 41859473  | -               | -               | -        | - | - | C | T |
| PD7523a | Substitution | 4 | 59028867  | 59028867  | -               | -               | -        | - | - | G | C |
| PD7523a | Substitution | 4 | 59354739  | 59354739  | -               | -               | -        | - | - | T | C |
| PD7523a | Substitution | 4 | 59591542  | 59591542  | -               | -               | -        | - | - | A | T |
| PD7523a | Substitution | 4 | 59980487  | 59980487  | -               | -               | -        | - | - | A | G |
| PD7523a | Substitution | 4 | 60032099  | 60032099  | -               | -               | -        | - | - | A | T |
| PD7523a | Substitution | 4 | 61217947  | 61217947  | -               | -               | -        | - | - | T | C |
| PD7523a | Substitution | 4 | 64676340  | 64676340  | -               | -               | -        | - | - | G | T |
| PD7523a | Substitution | 4 | 66879354  | 66879354  | -               | -               | -        | - | - | C | A |
| PD7523a | Substitution | 4 | 70079294  | 70079294  | UGT2B11         | CCDS3527.1      | Intronic | - | - | A | G |
| PD7523a | Substitution | 4 | 85573955  | 85573955  | -               | -               | -        | - | - | G | T |
| PD7523a | Substitution | 4 | 97738150  | 97738150  | -               | -               | -        | - | - | A | T |
| PD7523a | Substitution | 4 | 103366904 | 103366904 | -               | -               | -        | - | - | C | T |
| PD7523a | Substitution | 4 | 112275694 | 112275694 | -               | -               | -        | - | - | T | A |
| PD7523a | Substitution | 4 | 125728882 | 125728882 | -               | -               | -        | - | - | A | T |

|         |              |   |           |           |                 |                 |                                     |   |   |   |          |   |
|---------|--------------|---|-----------|-----------|-----------------|-----------------|-------------------------------------|---|---|---|----------|---|
| PD7523a | Substitution | 4 | 128603057 | 128603057 | INTU            | CCDS34061.1     | Intronic                            | - | - | - | T        | A |
| PD7523a | Substitution | 4 | 129478176 | 129478176 | -               | -               | -                                   | - | - | - | A        | G |
| PD7523a | Substitution | 4 | 134687955 | 134687955 | -               | -               | -                                   | - | - | - | A        | G |
| PD7523a | Indel        | 4 | 136110550 | 136110551 | -               | -               | -                                   | - | - | - | -        | - |
| PD7523a | Substitution | 4 | 136267396 | 136267396 | -               | -               | -                                   | - | - | - | T        | A |
| PD7523a | Substitution | 4 | 144889958 | 144889958 | -               | -               | -                                   | - | - | - | T        | C |
| PD7523a | Substitution | 4 | 146226736 | 146226736 | -               | -               | -                                   | - | - | - | A        | G |
| PD7523a | Substitution | 4 | 146617976 | 146617976 | C4orf51         | CCDS47140.1     | Intronic                            | - | - | - | C        | T |
| PD7523a | Substitution | 4 | 162363886 | 162363886 | FSTL5           | CCDS3802.1      | Intronic                            | - | - | - | C        | T |
| PD7523a | Substitution | 4 | 165350597 | 165350597 | -               | -               | -                                   | - | - | - | G        | T |
| PD7523a | Substitution | 4 | 169617513 | 169617513 | PALLD           | CCDS34098.1     | Intronic                            | - | - | - | A        | T |
| PD7523a | Substitution | 4 | 170692281 | 170692281 | -               | -               | -                                   | - | - | - | C        | A |
| PD7523a | Substitution | 4 | 171123436 | 171123436 | -               | -               | -                                   | - | - | - | C        | T |
| PD7523a | Substitution | 4 | 175039445 | 175039445 | -               | -               | -                                   | - | - | - | C        | T |
| PD7523a | Substitution | 4 | 176237578 | 176237578 | -               | -               | -                                   | - | - | - | C        | T |
| PD7523a | Substitution | 4 | 176700393 | 176700393 | GPM6A           | CCDS3824.1      | Intronic                            | - | - | - | C        | T |
| PD7523a | Substitution | 4 | 179287330 | 179287330 | -               | -               | -                                   | - | - | - | A        | G |
| PD7523a | Substitution | 4 | 179626113 | 179626113 | -               | -               | -                                   | - | - | - | A        | C |
| PD7523a | Substitution | 4 | 184578111 | 184578111 | RWDD4A          | CCDS34111.1     | Intronic                            | - | - | - | G        | A |
| PD7523a | Substitution | 4 | 185700767 | 185700767 | ACSL1           | CCDS3839.1      | Intronic                            | - | - | - | G        | A |
| PD7523a | Substitution | 4 | 185796742 | 185796742 | -               | -               | -                                   | - | - | - | C        | A |
| PD7523a | Substitution | 5 | 11224839  | 11224839  | CTNND2          | CCDS3881.1      | Intronic                            | - | - | - | C        | T |
| PD7523a | Substitution | 5 | 14318981  | 14318981  | TRIO            | CCDS3883.1      | Intronic                            | - | - | - | G        | T |
| PD7523a | Substitution | 5 | 21786273  | 21786273  | CDH12           | CCDS3890.1      | Intronic                            | - | - | - | C        | A |
| PD7523a | Indel        | 5 | 21957617  | 21957617  | -               | -               | -                                   | - | - | - | -        | - |
| PD7523a | Substitution | 5 | 22295233  | 22295233  | CDH12           | CCDS3890.1      | Intronic                            | - | - | - | G        | T |
| PD7523a | Substitution | 5 | 22363912  | 22363912  | CDH12           | CCDS3890.1      | Intronic                            | - | - | - | T        | G |
| PD7523a | Substitution | 5 | 23743500  | 23743500  | -               | -               | -                                   | - | - | - | A        | T |
| PD7523a | Substitution | 5 | 29945612  | 29945612  | -               | -               | -                                   | - | - | - | A        | G |
| PD7523a | Substitution | 5 | 30844919  | 30844919  | -               | -               | -                                   | - | - | - | A        | G |
| PD7523a | Substitution | 5 | 32127774  | 32127774  | GOLPH3          | CCDS3896.1      | Intronic                            | - | - | - | T        | C |
| PD7523a | Substitution | 5 | 32727398  | 32727398  | NPR3            | CCDS47196.1     | Intronic                            | - | - | - | A        | G |
| PD7523a | Substitution | 5 | 32912231  | 32912231  | -               | -               | -                                   | - | - | - | G        | T |
| PD7523a | Substitution | 5 | 51163158  | 51163158  | -               | -               | -                                   | - | - | - | C        | A |
| PD7523a | Substitution | 5 | 51363032  | 51363032  | ENSG00000248789 | ENST00000510583 | Intronic                            | - | - | - | G        | T |
| PD7523a | Substitution | 5 | 54947145  | 54947145  | SLC38A9         | CCDS3968.1      | Intronic                            | - | - | - | C        | A |
| PD7523a | Substitution | 5 | 55547073  | 55547073  | -               | -               | -                                   | - | - | - | G        | T |
| PD7523a | Substitution | 5 | 57711880  | 57711880  | -               | -               | -                                   | - | - | - | T        | A |
| PD7523a | Substitution | 5 | 61208085  | 61208085  | -               | -               | -                                   | - | - | - | T        | A |
| PD7523a | Substitution | 5 | 61346887  | 61346887  | -               | -               | -                                   | - | - | - | C        | G |
| PD7523a | Substitution | 5 | 63050155  | 63050155  | -               | -               | -                                   | - | - | - | T        | A |
| PD7523a | Substitution | 5 | 72372512  | 72372512  | FCH02           | CCDS47230.1     | Intronic                            | - | - | - | T        | C |
| PD7523a | Substitution | 5 | 76180941  | 76180941  | S100Z           | CCDS43333.1     | Intronic                            | - | - | - | G        | A |
| PD7523a | Substitution | 5 | 77239218  | 77239218  | -               | -               | -                                   | - | - | - | G        | A |
| PD7523a | Substitution | 5 | 77900439  | 77900439  | LHFPL2          | CCDS4042.1      | Intronic                            | - | - | - | T        | C |
| PD7523a | Substitution | 5 | 97111061  | 97111061  | -               | -               | -                                   | - | - | - | G        | A |
| PD7523a | Substitution | 5 | 106088057 | 106088057 | -               | -               | -                                   | - | - | - | C        | A |
| PD7523a | Substitution | 5 | 106115743 | 106115743 | -               | -               | -                                   | - | - | - | C        | A |
| PD7523a | Substitution | 5 | 106115744 | 106115744 | -               | -               | -                                   | - | - | - | A        | T |
| PD7523a | Substitution | 5 | 113579608 | 113579608 | -               | -               | -                                   | - | - | - | C        | A |
| PD7523a | Substitution | 5 | 117268911 | 117268911 | -               | -               | -                                   | - | - | - | C        | A |
| PD7523a | Substitution | 5 | 128837915 | 128837915 | ADAMTS19        | CCDS4146.1      | Intronic                            | - | - | - | A        | T |
| PD7523a | Substitution | 5 | 130200292 | 130200292 | -               | -               | -                                   | - | - | - | A        | G |
| PD7523a | Substitution | 5 | 150853155 | 150853155 | SLC36A1         | CCDS4316.1      | Intronic                            | - | - | - | C        | T |
| PD7523a | Substitution | 5 | 157966399 | 157966399 | -               | -               | -                                   | - | - | - | A        | G |
| PD7523a | Substitution | 5 | 164223586 | 164223586 | -               | -               | -                                   | - | - | - | C        | T |
| PD7523a | Substitution | 5 | 166697408 | 166697408 | -               | -               | -                                   | - | - | - | A        | T |
| PD7523a | Substitution | 5 | 170529393 | 170529393 | RANBP17         | CCDS34287.1     | Intronic                            | - | - | - | A        | G |
| PD7523a | Substitution | 5 | 177441135 | 177441135 | FAM153C         | CCDS43407.1     | Intronic                            | - | - | - | C        | T |
| PD7523a | Substitution | 6 | 6115835   | 6115835   | -               | -               | -                                   | - | - | - | A        | T |
| PD7523a | Substitution | 6 | 9818932   | 9818932   | OFCC1           | ENST00000460363 | Intronic                            | - | - | - | C        | T |
| PD7523a | Substitution | 6 | 11825927  | 11825927  | -               | -               | -                                   | - | - | - | C        | T |
| PD7523a | Substitution | 6 | 19759062  | 19759062  | -               | -               | -                                   | - | - | - | A        | C |
| PD7523a | Substitution | 6 | 22554598  | 22554598  | -               | -               | -                                   | - | - | - | T        | A |
| PD7523a | Substitution | 6 | 24417191  | 24417191  | MRS2            | CCDS4552.1      | Intronic                            | - | - | - | T        | G |
| PD7523a | Substitution | 6 | 31038755  | 31038755  | -               | -               | -                                   | - | - | - | T        | A |
| PD7523a | Substitution | 6 | 37471771  | 37471771  | -               | -               | -                                   | - | - | - | C        | T |
| PD7523a | Substitution | 6 | 51208928  | 51208928  | -               | -               | -                                   | - | - | - | A        | G |
| PD7523a | Substitution | 6 | 52724641  | 52724641  | -               | -               | -                                   | - | - | - | C        | T |
| PD7523a | Substitution | 6 | 57545254  | 57545254  | -               | -               | -                                   | - | - | - | G        | T |
| PD7523a | Substitution | 6 | 57855758  | 57855758  | -               | -               | -                                   | - | - | - | A        | C |
| PD7523a | Substitution | 6 | 65013944  | 65013944  | EYS             | CCDS47445.1     | Intronic                            | - | - | - | G        | A |
| PD7523a | Substitution | 6 | 65836948  | 65836948  | EYS             | CCDS47445.1     | Intronic                            | - | - | - | G        | A |
| PD7523a | Substitution | 6 | 67367012  | 67367012  | -               | -               | -                                   | - | - | - | A        | G |
| PD7523a | Substitution | 6 | 69200431  | 69200431  | -               | -               | -                                   | - | - | - | A        | C |
| PD7523a | Substitution | 6 | 70825101  | 70825101  | COL19A1         | CCDS4970.1      | Intronic                            | - | - | - | G        | A |
| PD7523a | Substitution | 6 | 74506524  | 74506524  | CD109           | CCDS4982.1      | Intronic                            | - | - | - | C        | T |
| PD7523a | Substitution | 6 | 75537725  | 75537725  | -               | -               | -                                   | - | - | - | A        | T |
| PD7523a | Substitution | 6 | 77045743  | 77045743  | -               | -               | -                                   | - | - | - | A        | T |
| PD7523a | Substitution | 6 | 77898598  | 77898598  | -               | -               | -                                   | - | - | - | G        | A |
| PD7523a | Substitution | 6 | 79546752  | 79546752  | -               | -               | -                                   | - | - | - | G        | C |
| PD7523a | Substitution | 6 | 80759833  | 80759833  | -               | -               | -                                   | - | - | - | A        | C |
| PD7523a | Substitution | 6 | 81589121  | 81589121  | -               | -               | -                                   | - | - | - | A        | T |
| PD7523a | Substitution | 6 | 86591650  | 86591650  | -               | -               | -                                   | - | - | - | A        | G |
| PD7523a | Substitution | 6 | 86724285  | 86724285  | -               | -               | -                                   | - | - | - | C        | T |
| PD7523a | Substitution | 6 | 91536487  | 91536487  | -               | -               | -                                   | - | - | - | G        | A |
| PD7523a | Substitution | 6 | 92618441  | 92618441  | -               | -               | -                                   | - | - | - | C        | T |
| PD7523a | Substitution | 6 | 94660881  | 94660881  | -               | -               | -                                   | - | - | - | T        | A |
| PD7523a | Substitution | 6 | 96876897  | 96876897  | -               | -               | -                                   | - | - | - | C        | T |
| PD7523a | Substitution | 6 | 104001652 | 104001652 | -               | -               | -                                   | - | - | - | A        | G |
| PD7523a | Substitution | 6 | 107330312 | 107330312 | -               | -               | -                                   | - | - | - | A        | T |
| PD7523a | Substitution | 6 | 111264240 | 111264240 | -               | -               | -                                   | - | - | - | A        | C |
| PD7523a | Substitution | 6 | 112309366 | 112309366 | -               | -               | -                                   | - | - | - | G        | T |
| PD7523a | Substitution | 6 | 113263128 | 113263128 | -               | -               | -                                   | - | - | - | C        | A |
| PD7523a | Substitution | 6 | 119043151 | 119043151 | -               | -               | -                                   | - | - | - | C        | T |
| PD7523a | Substitution | 6 | 124359063 | 124359063 | NKAIN2          | CCDS34526.1     | Intronic                            | - | - | - | C        | T |
| PD7523a | Indel        | 6 | 126237345 | 126237348 | -               | -               | -                                   | - | - | - | -        | - |
| PD7523a | Substitution | 6 | 127189916 | 127189916 | -               | -               | -                                   | - | - | - | G        | T |
| PD7523a | Indel        | 6 | 132270507 | 132270509 | CTGF            | CCDS5151.1      | r.1146_1148delc.945_947dup.K315delK | - | - | - | Deletion | - |
| PD7523a | Substitution | 6 | 137902178 | 137902178 | -               | -               | -                                   | - | - | - | C        | T |
| PD7523a | Substitution | 6 | 137992416 | 137992416 | -               | -               | -                                   | - | - | - | C        | G |
| PD7523a | Substitution | 6 | 140023782 | 140023782 | -               | -               | -                                   | - | - | - | A        | G |
| PD7523a | Substitution | 6 | 141506440 | 141506440 | -               | -               | -                                   | - | - | - | G        | A |
| PD7523a | Substitution | 6 | 145423688 | 145423688 | -               | -               | -                                   | - | - | - | C        | T |
| PD7523a | Substitution | 6 | 150833576 | 150833576 | -               | -               | -                                   | - | - | - | G        | A |
| PD7523a | Substitution | 6 | 153957865 | 153957865 | -               | -               | -                                   | - | - | - | G        | A |
| PD7523a | Substitution | 6 | 153986727 | 153986727 | -               | -               | -                                   | - | - | - | A        | C |
| PD7523a | Substitution | 6 | 158712415 | 158712415 | -               | -               | -                                   | - | - | - | G        | T |
| PD7523a | Substitution | 6 | 166934795 | 166934795 | RPS6KA2         | CCDS5294.1      | Intronic                            | - | - | - | C        | T |
| PD7523a | Substitution | 6 | 169928027 | 169928027 | WDR27           | CCDS47520.1     | Intronic                            | - | - | - | C        | G |
| PD7523a | Substitution | 7 | 4741971   | 4741971   | FOXX1           | CCDS34591.1     | Intronic                            | - | - | - | T        | A |

|         |              |    |           |           |                 |                 |             |           |            |   |   |
|---------|--------------|----|-----------|-----------|-----------------|-----------------|-------------|-----------|------------|---|---|
| PD7523a | Substitution | 7  | 4796617   | 4796617   | FOXK1           | CCDS34591.1     | c.1051-8C>A | p.?       | Splice     | C | A |
| PD7523a | Substitution | 7  | 13129536  | 13129536  | -               | -               | -           | -         | -          | C | T |
| PD7523a | Substitution | 7  | 33076110  | 33076110  | NT5C3           | CCDS34617.1     | Intronic    | -         | -          | T | C |
| PD7523a | Substitution | 7  | 33269098  | 33269098  | BBS9            | CCDS43566.1     | Intronic    | -         | -          | A | T |
| PD7523a | Substitution | 7  | 36445998  | 36445998  | ANLN            | CCDS5447.1      | c.696C>T    | p.T232T   | Silent     | C | T |
| PD7523a | Indel        | 7  | 48426633  | 48426662  | -               | -               | -           | -         | -          | - | - |
| PD7523a | Substitution | 7  | 48541200  | 48541200  | ABCA13          | CCDS47584.1     | Intronic    | -         | -          | G | T |
| PD7523a | Substitution | 7  | 51922124  | 51922124  | -               | -               | -           | -         | -          | A | T |
| PD7523a | Substitution | 7  | 52209794  | 52209794  | -               | -               | -           | -         | -          | G | T |
| PD7523a | Substitution | 7  | 52624210  | 52624210  | -               | -               | -           | -         | -          | A | G |
| PD7523a | Substitution | 7  | 53550164  | 53550164  | -               | -               | -           | -         | -          | A | G |
| PD7523a | Indel        | 7  | 53972247  | 53972253  | -               | -               | -           | -         | -          | - | - |
| PD7523a | Substitution | 7  | 57529896  | 57529896  | ZNF716          | ENST00000420713 | Non-coding  | r.1841a>u | 3prime UTR | A | T |
| PD7523a | Substitution | 7  | 61832874  | 61832874  | -               | -               | -           | -         | -          | G | T |
| PD7523a | Substitution | 7  | 67578245  | 67578245  | -               | -               | -           | -         | -          | G | C |
| PD7523a | Substitution | 7  | 84562503  | 84562503  | -               | -               | -           | -         | -          | A | G |
| PD7523a | Substitution | 7  | 94853596  | 94853596  | PPP1R9A         | CCDS34683.1     | Intronic    | -         | -          | G | T |
| PD7523a | Substitution | 7  | 94853597  | 94853597  | PPP1R9A         | CCDS34683.1     | Intronic    | -         | -          | G | T |
| PD7523a | Substitution | 7  | 97513084  | 97513084  | -               | -               | -           | -         | -          | C | T |
| PD7523a | Substitution | 7  | 97545344  | 97545344  | AC079781.1      | ENST00000510081 | Intronic    | -         | -          | T | C |
| PD7523a | Substitution | 7  | 107118330 | 107118330 | COG5            | CCDS5743.1      | Intronic    | -         | -          | T | C |
| PD7523a | Substitution | 7  | 109054927 | 109054927 | -               | -               | -           | -         | -          | A | T |
| PD7523a | Substitution | 7  | 109689911 | 109689911 | -               | -               | -           | -         | -          | G | T |
| PD7523a | Substitution | 7  | 118923247 | 118923247 | -               | -               | -           | -         | -          | T | C |
| PD7523a | Substitution | 7  | 130931250 | 130931250 | MKLN1           | ENST00000421797 | Intronic    | -         | -          | G | A |
| PD7523a | Substitution | 7  | 137551573 | 137551573 | -               | -               | -           | -         | -          | G | A |
| PD7523a | Substitution | 7  | 139497560 | 139497560 | TBXAS1          | CCDS5855.1      | Intronic    | -         | -          | A | T |
| PD7523a | Substitution | 7  | 152781027 | 152781027 | -               | -               | -           | -         | -          | C | T |
| PD7523a | Substitution | 7  | 155230006 | 155230006 | -               | -               | -           | -         | -          | T | C |
| PD7523a | Substitution | 8  | 4166877   | 4166877   | -               | -               | -           | -         | -          | A | T |
| PD7523a | Substitution | 8  | 10599895  | 10599895  | SOX7            | ENST00000354846 | Intronic    | -         | -          | G | A |
| PD7523a | Substitution | 8  | 12752768  | 12752768  | -               | -               | -           | -         | -          | G | T |
| PD7523a | Substitution | 8  | 12752769  | 12752769  | -               | -               | -           | -         | -          | A | T |
| PD7523a | Substitution | 8  | 15527010  | 15527010  | TUSC3           | CCDS5993.1      | Intronic    | -         | -          | T | A |
| PD7523a | Substitution | 8  | 19153387  | 19153387  | -               | -               | -           | -         | -          | G | A |
| PD7523a | Substitution | 8  | 37167933  | 37167933  | -               | -               | -           | -         | -          | C | T |
| PD7523a | Substitution | 8  | 37462542  | 37462542  | -               | -               | -           | -         | -          | G | A |
| PD7523a | Substitution | 8  | 40102791  | 40102791  | -               | -               | -           | -         | -          | A | C |
| PD7523a | Substitution | 8  | 55165684  | 55165684  | -               | -               | -           | -         | -          | G | A |
| PD7523a | Substitution | 8  | 58902411  | 58902411  | -               | -               | -           | -         | -          | G | A |
| PD7523a | Substitution | 8  | 61124496  | 61124496  | CA8             | CCDS6174.1      | Intronic    | -         | -          | A | T |
| PD7523a | Substitution | 8  | 63294926  | 63294926  | -               | -               | -           | -         | -          | T | A |
| PD7523a | Indel        | 8  | 64578176  | 64578176  | -               | -               | -           | -         | -          | - | - |
| PD7523a | Substitution | 8  | 66811504  | 66811504  | -               | -               | -           | -         | -          | G | A |
| PD7523a | Substitution | 8  | 71716371  | 71716371  | -               | -               | -           | -         | -          | A | T |
| PD7523a | Substitution | 8  | 78892509  | 78892509  | -               | -               | -           | -         | -          | C | G |
| PD7523a | Substitution | 8  | 83628610  | 83628610  | -               | -               | -           | -         | -          | C | T |
| PD7523a | Substitution | 8  | 84180304  | 84180304  | -               | -               | -           | -         | -          | C | T |
| PD7523a | Substitution | 8  | 86524514  | 86524514  | -               | -               | -           | -         | -          | G | A |
| PD7523a | Substitution | 8  | 89649503  | 89649503  | -               | -               | -           | -         | -          | G | C |
| PD7523a | Substitution | 8  | 95085761  | 95085761  | -               | -               | -           | -         | -          | G | A |
| PD7523a | Substitution | 8  | 98814546  | 98814546  | LAPTM4B         | CCDS6275.1      | Intronic    | -         | -          | A | G |
| PD7523a | Substitution | 8  | 102776759 | 102776759 | NCALD           | CCDS6292.1      | Intronic    | -         | -          | G | A |
| PD7523a | Substitution | 8  | 109359780 | 109359780 | -               | -               | -           | -         | -          | C | T |
| PD7523a | Substitution | 8  | 111098612 | 111098612 | -               | -               | -           | -         | -          | T | A |
| PD7523a | Indel        | 8  | 111474265 | 111474266 | -               | -               | -           | -         | -          | - | - |
| PD7523a | Substitution | 8  | 111669300 | 111669300 | -               | -               | -           | -         | -          | A | T |
| PD7523a | Substitution | 8  | 114981347 | 114981347 | -               | -               | -           | -         | -          | A | T |
| PD7523a | Substitution | 8  | 129657113 | 129657113 | -               | -               | -           | -         | -          | A | T |
| PD7523a | Substitution | 8  | 129854549 | 129854549 | -               | -               | -           | -         | -          | A | T |
| PD7523a | Substitution | 8  | 132402028 | 132402028 | -               | -               | -           | -         | -          | A | C |
| PD7523a | Substitution | 8  | 132673146 | 132673146 | -               | -               | -           | -         | -          | C | A |
| PD7523a | Substitution | 9  | 1655253   | 1655253   | -               | -               | -           | -         | -          | C | T |
| PD7523a | Substitution | 9  | 7944009   | 7944009   | -               | -               | -           | -         | -          | C | T |
| PD7523a | Substitution | 9  | 11207072  | 11207072  | -               | -               | -           | -         | -          | A | G |
| PD7523a | Substitution | 9  | 11959645  | 11959645  | -               | -               | -           | -         | -          | C | A |
| PD7523a | Substitution | 9  | 22194106  | 22194106  | -               | -               | -           | -         | -          | A | G |
| PD7523a | Substitution | 9  | 24057508  | 24057508  | -               | -               | -           | -         | -          | T | A |
| PD7523a | Substitution | 9  | 29931487  | 29931487  | -               | -               | -           | -         | -          | C | G |
| PD7523a | Substitution | 9  | 29931497  | 29931497  | -               | -               | -           | -         | -          | G | A |
| PD7523a | Substitution | 9  | 29931498  | 29931498  | -               | -               | -           | -         | -          | G | T |
| PD7523a | Substitution | 9  | 30168202  | 30168202  | -               | -               | -           | -         | -          | T | C |
| PD7523a | Substitution | 9  | 30740261  | 30740261  | -               | -               | -           | -         | -          | C | G |
| PD7523a | Substitution | 9  | 32986304  | 32986304  | APTX            | CCDS6532.1      | Intronic    | -         | -          | C | T |
| PD7523a | Substitution | 9  | 39115199  | 39115199  | CNTNAP3         | CCDS6616.1      | Intronic    | -         | -          | C | T |
| PD7523a | Substitution | 9  | 46874109  | 46874109  | -               | -               | -           | -         | -          | C | T |
| PD7523a | Substitution | 9  | 68742530  | 68742530  | -               | -               | -           | -         | -          | C | G |
| PD7523a | Substitution | 9  | 76441447  | 76441447  | -               | -               | -           | -         | -          | T | C |
| PD7523a | Substitution | 9  | 85596100  | 85596100  | RASEF           | CCDS6662.1      | Non-coding  | r.3976c>u | 3prime UTR | G | A |
| PD7523a | Substitution | 9  | 87891773  | 87891773  | -               | -               | -           | -         | -          | A | T |
| PD7523a | Substitution | 9  | 93255081  | 93255081  | -               | -               | -           | -         | -          | A | T |
| PD7523a | Substitution | 9  | 103607331 | 103607331 | -               | -               | -           | -         | -          | C | T |
| PD7523a | Indel        | 9  | 104991003 | 104991003 | -               | -               | -           | -         | -          | - | - |
| PD7523a | Substitution | 9  | 105619390 | 105619390 | -               | -               | -           | -         | -          | A | C |
| PD7523a | Substitution | 9  | 107402722 | 107402722 | -               | -               | -           | -         | -          | T | G |
| PD7523a | Substitution | 9  | 109387148 | 109387148 | -               | -               | -           | -         | -          | T | C |
| PD7523a | Substitution | 9  | 117088890 | 117088890 | -               | -               | -           | -         | -          | G | A |
| PD7523a | Substitution | 9  | 134883514 | 134883514 | MED27           | CCDS6945.1      | Intronic    | -         | -          | T | C |
| PD7523a | Substitution | 9  | 135318081 | 135318081 | C9orf171        | CCDS6949.1      | Intronic    | -         | -          | G | A |
| PD7523a | Substitution | 9  | 135505472 | 135505472 | DDX31           | CCDS6951.1      | Intronic    | -         | -          | C | T |
| PD7523a | Substitution | 10 | 2212377   | 2212377   | -               | -               | -           | -         | -          | C | A |
| PD7523a | Substitution | 10 | 2837119   | 2837119   | ENSG00000214531 | ENST00000398522 | Intronic    | -         | -          | A | C |
| PD7523a | Substitution | 10 | 5350356   | 5350356   | -               | -               | -           | -         | -          | A | G |
| PD7523a | Substitution | 10 | 7034099   | 7034099   | -               | -               | -           | -         | -          | C | T |
| PD7523a | Substitution | 10 | 8477664   | 8477664   | -               | -               | -           | -         | -          | A | T |
| PD7523a | Substitution | 10 | 9454897   | 9454897   | -               | -               | -           | -         | -          | A | C |
| PD7523a | Substitution | 10 | 17346718  | 17346718  | -               | -               | -           | -         | -          | C | T |
| PD7523a | Substitution | 10 | 18459912  | 18459912  | CACNB2          | CCDS7127.1      | Intronic    | -         | -          | T | G |
| PD7523a | Substitution | 10 | 27570056  | 27570056  | -               | -               | -           | -         | -          | A | G |
| PD7523a | Indel        | 10 | 31188514  | 31188514  | -               | -               | -           | -         | -          | - | - |
| PD7523a | Substitution | 10 | 33112526  | 33112526  | C10orf68        | CCDS31177.1     | Intronic    | -         | -          | G | T |
| PD7523a | Substitution | 10 | 33715107  | 33715107  | -               | -               | -           | -         | -          | T | A |
| PD7523a | Substitution | 10 | 55190880  | 55190880  | -               | -               | -           | -         | -          | T | A |
| PD7523a | Substitution | 10 | 55910670  | 55910670  | PCDH15          | CCDS44404.1     | Intronic    | -         | -          | T | A |
| PD7523a | Substitution | 10 | 58487592  | 58487592  | -               | -               | -           | -         | -          | A | T |
| PD7523a | Substitution | 10 | 59341772  | 59341772  | -               | -               | -           | -         | -          | C | T |
| PD7523a | Indel        | 10 | 59538536  | 59538537  | -               | -               | -           | -         | -          | - | - |
| PD7523a | Substitution | 10 | 62803294  | 62803294  | -               | -               | -           | -         | -          | C | T |
| PD7523a | Substitution | 10 | 65253708  | 65253708  | -               | -               | -           | -         | -          | T | C |
| PD7523a | Substitution | 10 | 81420305  | 81420305  | -               | -               | -           | -         | -          | G | T |
| PD7523a | Substitution | 10 | 85077284  | 85077284  | -               | -               | -           | -         | -          | G | T |





|         |              |    |           |           |                 |                 |            |           |            |   |   |
|---------|--------------|----|-----------|-----------|-----------------|-----------------|------------|-----------|------------|---|---|
| PD7523a | Substitution | 16 | 1888120   | 1888120   | FAHD1           | CCDS32367.1     | c.740G>A   | p.R247H   | Missense   | G | A |
| PD7523a | Substitution | 16 | 3519261   | 3519261   | NAT15           | CCDS45396.1     | Intronic   | -         | -          | A | G |
| PD7523a | Substitution | 16 | 16773048  | 16773048  | -               | -               | -          | -         | -          | T | A |
| PD7523a | Substitution | 16 | 26879253  | 26879253  | -               | -               | -          | -         | -          | G | A |
| PD7523a | Substitution | 16 | 34765592  | 34765592  | -               | -               | -          | -         | -          | G | T |
| PD7523a | Substitution | 16 | 49279743  | 49279743  | -               | -               | -          | -         | -          | G | A |
| PD7523a | Substitution | 16 | 50267908  | 50267908  | PAPD5           | ENST00000436909 | Non-coding | r.6766c>u | 3prime UTR | C | T |
| PD7523a | Substitution | 16 | 54276257  | 54276257  | -               | -               | -          | -         | -          | G | A |
| PD7523a | Substitution | 16 | 54562451  | 54562451  | ENSG00000227093 | ENST00000449142 | Intronic   | -         | -          | A | C |
| PD7523a | Substitution | 16 | 56270608  | 56270608  | GNAO1           | CCDS10756.1     | Intronic   | -         | -          | T | G |
| PD7523a | Substitution | 16 | 64814446  | 64814446  | -               | -               | -          | -         | -          | G | T |
| PD7523a | Substitution | 16 | 65447846  | 65447846  | AC009055.1      | ENST00000505989 | Intronic   | -         | -          | C | T |
| PD7523a | Substitution | 16 | 76095103  | 76095103  | -               | -               | -          | -         | -          | C | T |
| PD7523a | Substitution | 16 | 83078781  | 83078781  | CDH13           | ENST00000268613 | Intronic   | -         | -          | T | A |
| PD7523a | Substitution | 16 | 88300884  | 88300884  | -               | -               | -          | -         | -          | C | G |
| PD7523a | Substitution | 17 | 4673675   | 4673675   | -               | -               | -          | -         | -          | T | A |
| PD7523a | Indel        | 17 | 16128600  | 16128600  | -               | -               | -          | -         | -          | - | - |
| PD7523a | Substitution | 17 | 27586229  | 27586229  | NUFIP2          | CCDS32600.1     | Non-coding | r.7505g>a | 3prime UTR | C | T |
| PD7523a | Substitution | 17 | 30313506  | 30313506  | SUZ12P          | CCDS11270.1     | Intronic   | -         | -          | C | G |
| PD7523a | Substitution | 17 | 34461606  | 34461606  | -               | -               | -          | -         | -          | G | A |
| PD7523a | Substitution | 17 | 40749046  | 40749046  | FAM134C         | CCDS11432.1     | Intronic   | -         | -          | T | A |
| PD7523a | Substitution | 17 | 43457160  | 43457160  | -               | -               | -          | -         | -          | C | T |
| PD7523a | Substitution | 17 | 46859680  | 46859680  | TTL6            | CCDS45724.1     | Intronic   | -         | -          | C | T |
| PD7523a | Substitution | 17 | 48437700  | 48437700  | XYLT2           | CCDS11563.1     | Non-coding | r.2695c>u | 3prime UTR | C | T |
| PD7523a | Substitution | 17 | 49612508  | 49612508  | -               | -               | -          | -         | -          | G | A |
| PD7523a | Substitution | 17 | 49633661  | 49633661  | -               | -               | -          | -         | -          | G | A |
| PD7523a | Substitution | 17 | 51829995  | 51829995  | -               | -               | -          | -         | -          | C | T |
| PD7523a | Substitution | 17 | 52514960  | 52514960  | -               | -               | -          | -         | -          | A | T |
| PD7523a | Substitution | 17 | 56466183  | 56466183  | RNF43           | CCDS11607.1     | Intronic   | -         | -          | T | C |
| PD7523a | Substitution | 17 | 57728342  | 57728342  | CLTC            | CCDS32696.1     | Intronic   | -         | -          | A | T |
| PD7523a | Substitution | 17 | 69318029  | 69318029  | -               | -               | -          | -         | -          | C | T |
| PD7523a | Substitution | 17 | 72319162  | 72319162  | -               | -               | -          | -         | -          | C | T |
| PD7523a | Substitution | 17 | 73421513  | 73421513  | -               | -               | -          | -         | -          | G | A |
| PD7523a | Substitution | 17 | 77128819  | 77128819  | ENSG00000167281 | CCDS45805.1     | Intronic   | -         | -          | C | T |
| PD7523a | Substitution | 18 | 2269347   | 2269347   | -               | -               | -          | -         | -          | G | A |
| PD7523a | Substitution | 18 | 4226021   | 4226021   | -               | -               | -          | -         | -          | A | T |
| PD7523a | Substitution | 18 | 12178615  | 12178615  | -               | -               | -          | -         | -          | A | G |
| PD7523a | Indel        | 18 | 14128722  | 14128722  | -               | -               | -          | -         | -          | - | - |
| PD7523a | Substitution | 18 | 26736184  | 26736184  | -               | -               | -          | -         | -          | A | G |
| PD7523a | Substitution | 18 | 31620978  | 31620978  | NOL4            | CCDS11907.2     | Intronic   | -         | -          | G | A |
| PD7523a | Substitution | 18 | 42204723  | 42204723  | -               | -               | -          | -         | -          | G | A |
| PD7523a | Substitution | 18 | 45595700  | 45595700  | -               | -               | -          | -         | -          | C | T |
| PD7523a | Substitution | 18 | 56217408  | 56217408  | ALPK2           | CCDS11966.2     | Intronic   | -         | -          | A | T |
| PD7523a | Substitution | 18 | 62601226  | 62601226  | -               | -               | -          | -         | -          | T | A |
| PD7523a | Substitution | 18 | 67259025  | 67259025  | DOK6            | CCDS32841.1     | Intronic   | -         | -          | G | A |
| PD7523a | Substitution | 18 | 69889811  | 69889811  | -               | -               | -          | -         | -          | C | T |
| PD7523a | Substitution | 19 | 6119893   | 6119893   | -               | -               | -          | -         | -          | C | T |
| PD7523a | Substitution | 19 | 32272177  | 32272177  | -               | -               | -          | -         | -          | T | G |
| PD7523a | Substitution | 19 | 38229418  | 38229418  | ZNF573          | CCDS12508.1     | c.1799G>T  | p.R600I   | Missense   | C | A |
| PD7523a | Substitution | 19 | 44466709  | 44466709  | ZNF230          | CCDS12633.1     | Intronic   | -         | -          | C | G |
| PD7523a | Substitution | 19 | 50579005  | 50579005  | -               | -               | -          | -         | -          | G | A |
| PD7523a | Substitution | 19 | 57338056  | 57338056  | PEG3AS          | CCDS12948.1     | Intronic   | -         | -          | C | T |
| PD7523a | Substitution | 20 | 7377051   | 7377051   | -               | -               | -          | -         | -          | C | T |
| PD7523a | Substitution | 20 | 8551678   | 8551678   | PLCB1           | CCDS13103.1     | Intronic   | -         | -          | G | A |
| PD7523a | Substitution | 20 | 9126589   | 9126589   | PLCB4           | CCDS13104.1     | Intronic   | -         | -          | T | C |
| PD7523a | Substitution | 20 | 10297976  | 10297976  | -               | -               | -          | -         | -          | G | C |
| PD7523a | Substitution | 20 | 18835307  | 18835307  | -               | -               | -          | -         | -          | C | A |
| PD7523a | Substitution | 20 | 19842258  | 19842258  | -               | -               | -          | -         | -          | A | G |
| PD7523a | Substitution | 20 | 20455591  | 20455591  | RALGAP2         | CCDS46584.1     | Intronic   | -         | -          | C | T |
| PD7523a | Substitution | 20 | 23687689  | 23687689  | -               | -               | -          | -         | -          | A | T |
| PD7523a | Substitution | 20 | 39230023  | 39230023  | -               | -               | -          | -         | -          | C | G |
| PD7523a | Substitution | 20 | 41620046  | 41620046  | PTPRT           | CCDS42874.1     | Intronic   | -         | -          | G | A |
| PD7523a | Substitution | 20 | 48525648  | 48525648  | SPATA2          | CCDS13422.1     | Intronic   | -         | -          | C | T |
| PD7523a | Substitution | 20 | 49296592  | 49296592  | FAM65C          | CCDS13431.2     | Intronic   | -         | -          | C | T |
| PD7523a | Substitution | 21 | 20415017  | 20415017  | -               | -               | -          | -         | -          | T | A |
| PD7523a | Substitution | 21 | 23214521  | 23214521  | -               | -               | -          | -         | -          | C | T |
| PD7523a | Substitution | 21 | 28543429  | 28543429  | -               | -               | -          | -         | -          | A | G |
| PD7523a | Substitution | 21 | 28988004  | 28988004  | -               | -               | -          | -         | -          | C | A |
| PD7523a | Substitution | 22 | 23379662  | 23379662  | -               | -               | -          | -         | -          | C | T |
| PD7523a | Substitution | 22 | 23786002  | 23786002  | -               | -               | -          | -         | -          | A | G |
| PD7523a | Substitution | 22 | 25073241  | 25073241  | -               | -               | -          | -         | -          | G | C |
| PD7523a | Substitution | 22 | 34588084  | 34588084  | -               | -               | -          | -         | -          | G | T |
| PD7523a | Substitution | 22 | 37840820  | 37840820  | -               | -               | -          | -         | -          | C | T |
| PD7523a | Substitution | 22 | 38544060  | 38544060  | PLA2G6          | CCDS13967.1     | Intronic   | -         | -          | A | C |
| PD7523a | Substitution | 22 | 45140464  | 45140464  | PRRS-ARHGAP8    | ENST00000352766 | Intronic   | -         | -          | G | C |
| PD7523a | Substitution | X  | 5633579   | 5633579   | -               | -               | -          | -         | -          | G | A |
| PD7523a | Substitution | X  | 7682956   | 7682956   | -               | -               | -          | -         | -          | T | A |
| PD7523a | Substitution | X  | 15065509  | 15065509  | -               | -               | -          | -         | -          | T | C |
| PD7523a | Substitution | X  | 25265834  | 25265834  | -               | -               | -          | -         | -          | G | A |
| PD7523a | Substitution | X  | 31902521  | 31902521  | DMD             | CCDS14233.1     | Intronic   | -         | -          | A | G |
| PD7523a | Substitution | X  | 33025161  | 33025161  | DMD             | CCDS14233.1     | Intronic   | -         | -          | C | T |
| PD7523a | Substitution | X  | 34486016  | 34486016  | -               | -               | -          | -         | -          | A | G |
| PD7523a | Substitution | X  | 36103964  | 36103964  | CXorf59         | CCDS14238.1     | Intronic   | -         | -          | T | C |
| PD7523a | Substitution | X  | 55160846  | 55160846  | -               | -               | -          | -         | -          | T | C |
| PD7523a | Substitution | X  | 56346795  | 56346795  | -               | -               | -          | -         | -          | T | C |
| PD7523a | Substitution | X  | 78713183  | 78713183  | -               | -               | -          | -         | -          | T | C |
| PD7523a | Substitution | X  | 89991438  | 89991438  | -               | -               | -          | -         | -          | G | A |
| PD7523a | Substitution | X  | 92440025  | 92440025  | -               | -               | -          | -         | -          | T | A |
| PD7523a | Substitution | X  | 93490895  | 93490895  | -               | -               | -          | -         | -          | T | A |
| PD7523a | Substitution | X  | 94161634  | 94161634  | -               | -               | -          | -         | -          | A | C |
| PD7523a | Substitution | X  | 94522655  | 94522655  | -               | -               | -          | -         | -          | G | A |
| PD7523a | Substitution | X  | 96461439  | 96461439  | DIAPH2          | CCDS14467.1     | Intronic   | -         | -          | A | G |
| PD7523a | Substitution | X  | 97389656  | 97389656  | -               | -               | -          | -         | -          | T | A |
| PD7523a | Substitution | X  | 108310508 | 108310508 | -               | -               | -          | -         | -          | A | T |
| PD7523a | Substitution | X  | 110724082 | 110724082 | -               | -               | -          | -         | -          | G | A |
| PD7523a | Substitution | X  | 116904883 | 116904883 | -               | -               | -          | -         | -          | C | G |
| PD7523a | Substitution | X  | 140993840 | 140993840 | MAGEC1          | CCDS35417.1     | c.650C>T   | p.S217F   | Missense   | C | T |
| PD7523a | Substitution | X  | 144516714 | 144516714 | -               | -               | -          | -         | -          | T | C |
| PD7523a | Substitution | X  | 146023088 | 146023088 | -               | -               | -          | -         | -          | A | C |
| PD7523a | Substitution | Y  | 4016039   | 4016039   | -               | -               | -          | -         | -          | G | A |
| PD7523a | Substitution | Y  | 14316304  | 14316304  | -               | -               | -          | -         | -          | G | A |
